# Supplementary material
Source: PubMed Central journal article supplement (PMC9985066)

# Supplementary File 2

## One-variant images of CSVs detected by SVision in HG00733

### Note:

- CSVs are grouped based on their graph ID. For CSVs belonging a certain graph, the diagram of the graph is first shown, following by complex events.
- Each CSV is named as *chrom-start-end*.
- The y-axis of the denoised image is the read used by SVision for discovery, and the x-axis is the reference sequence.

# GraphID-12, Inverted duplication

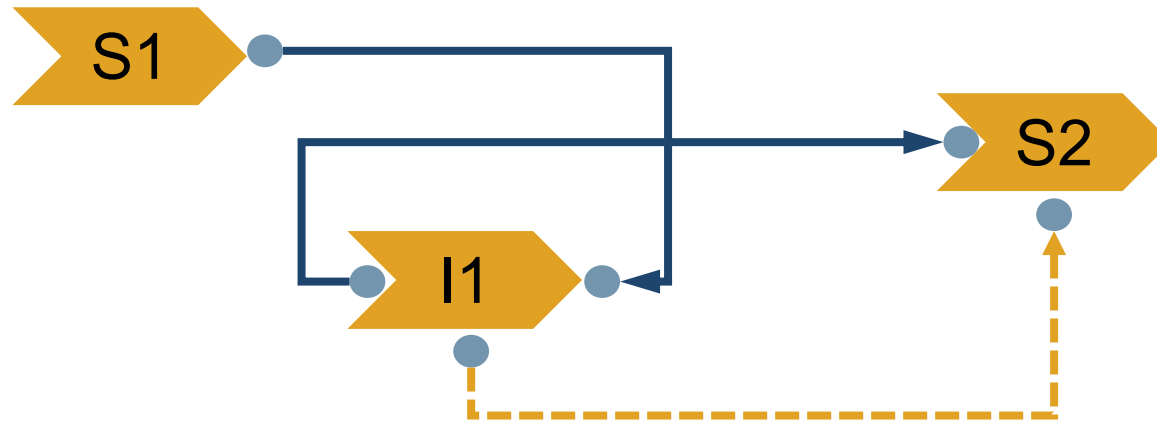

Nodes=S:2,I:1,D:1

❖ chr1-81194666-81195870

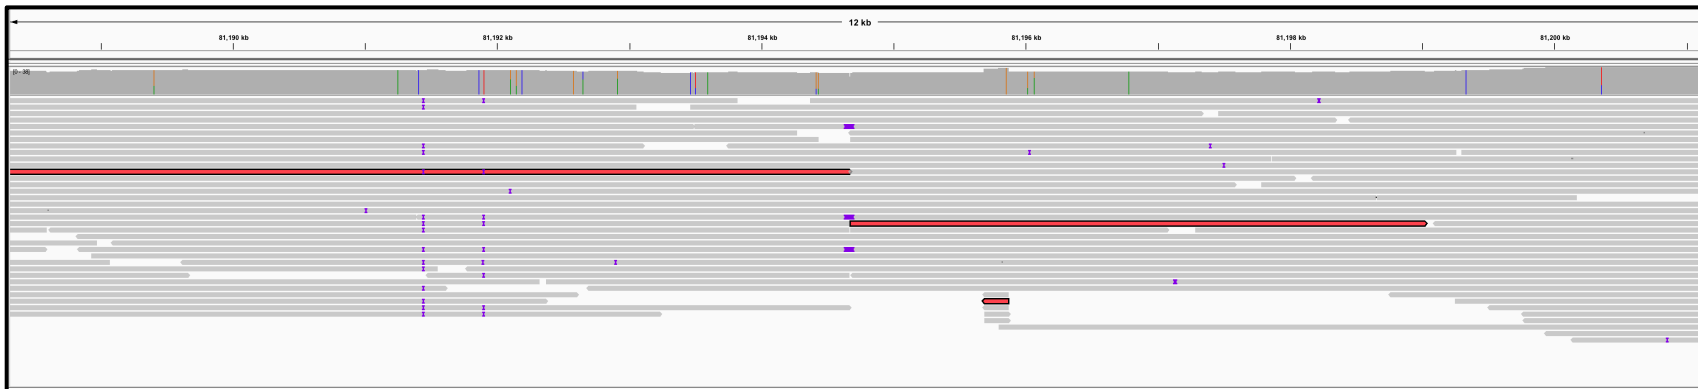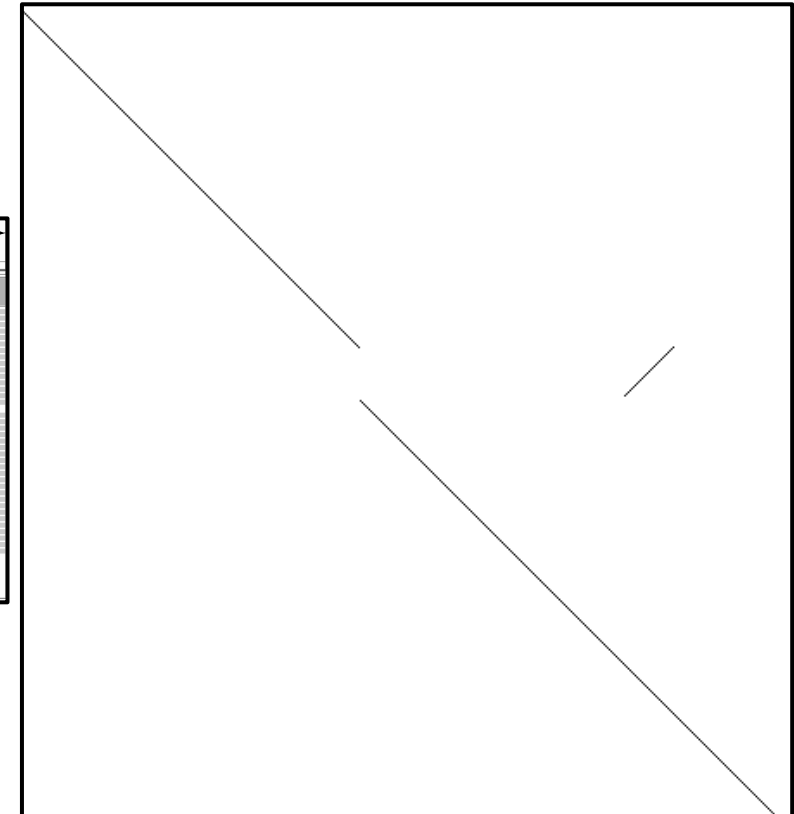

❖ chr1-175231433-175232798

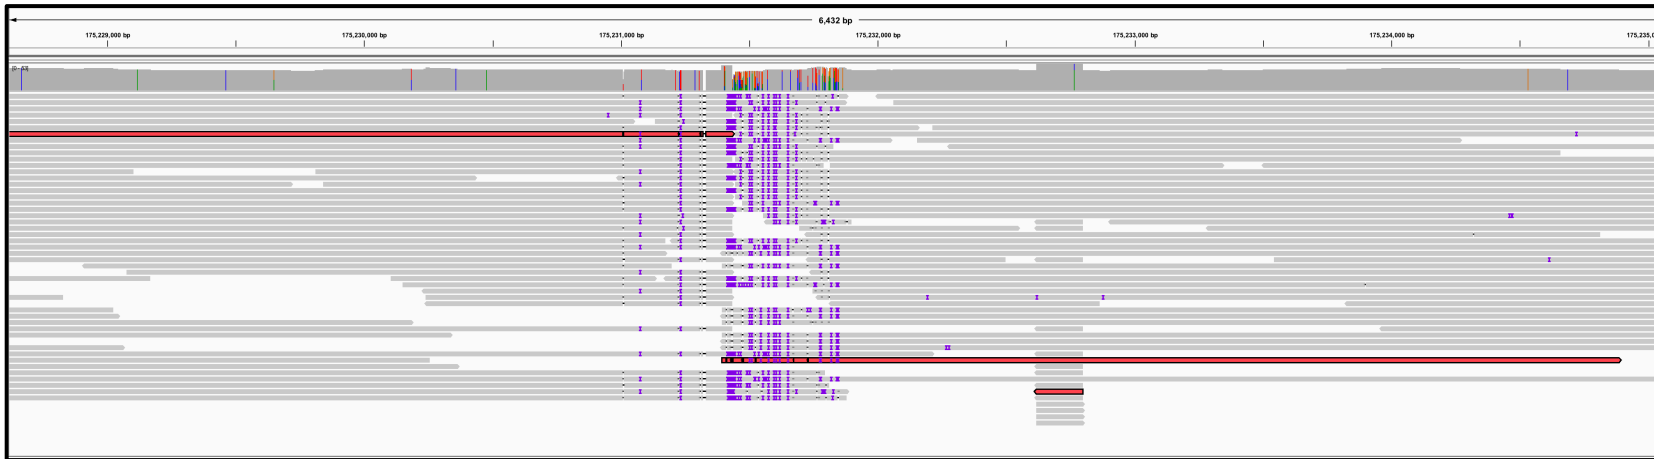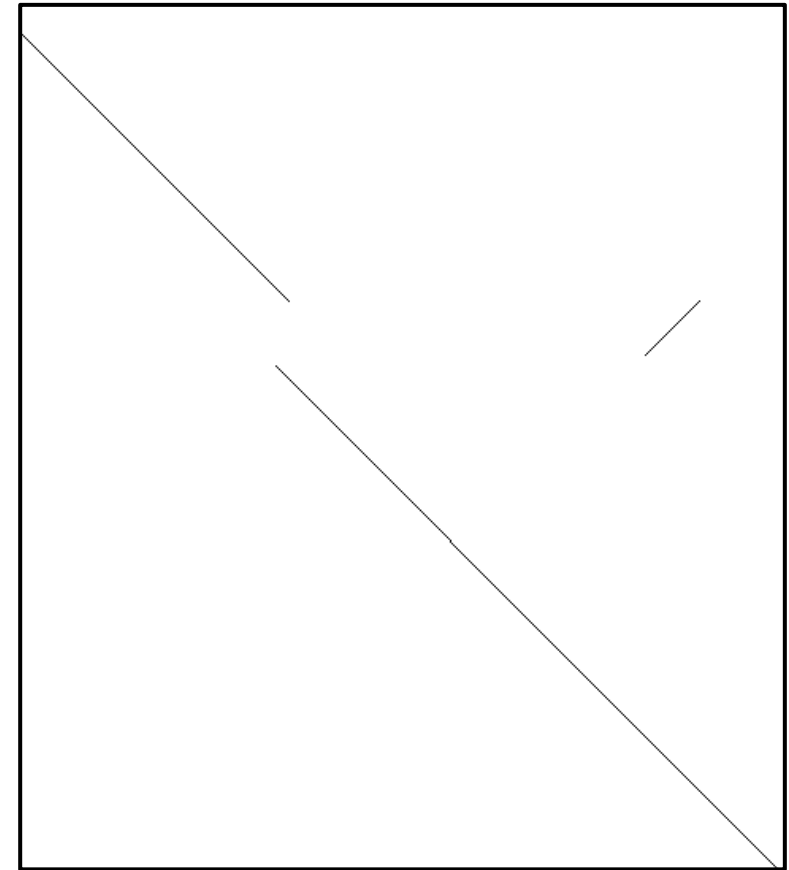



❖ chr2-61473618-61476320

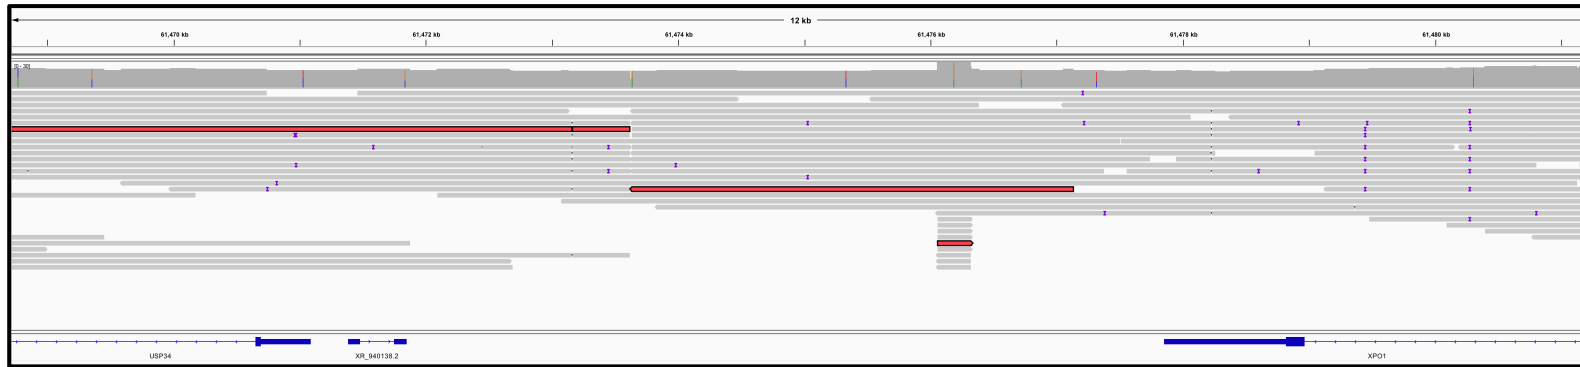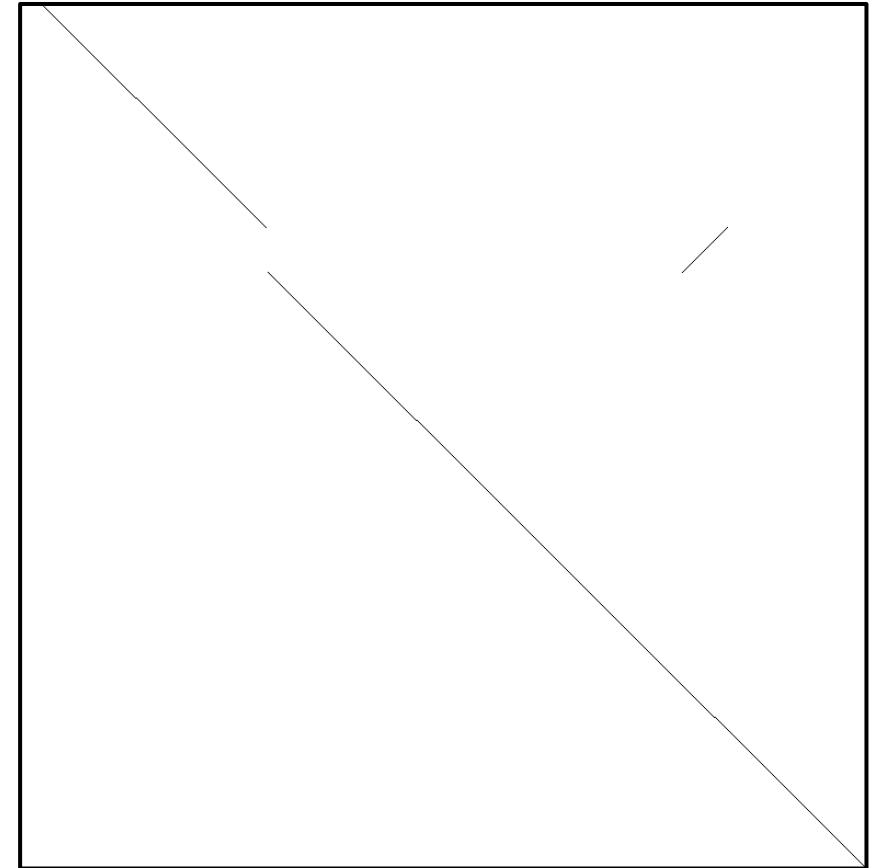

❖ chr2-124294179-124295658

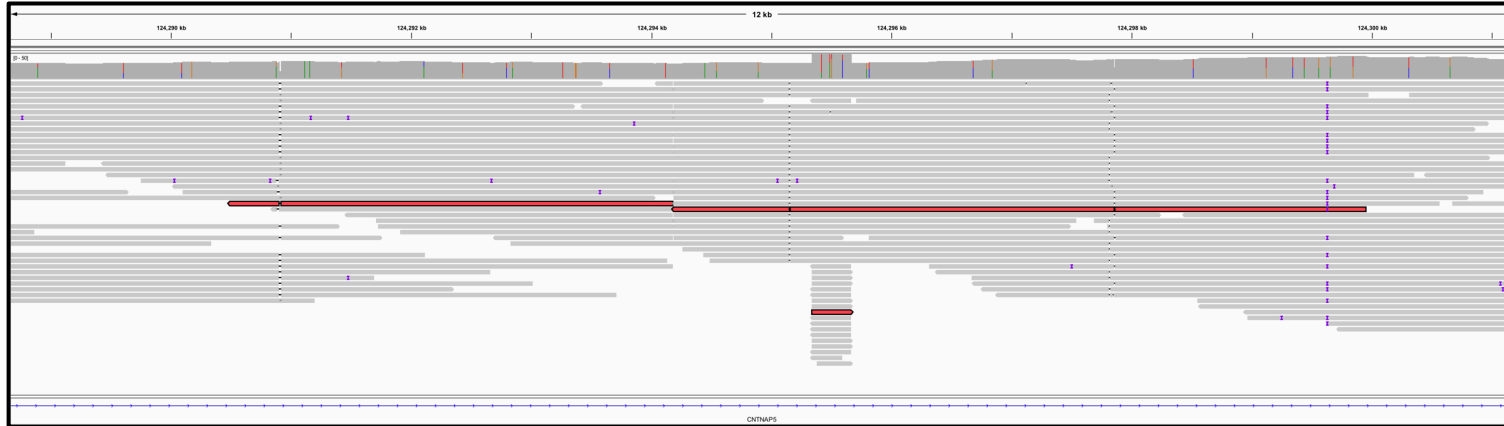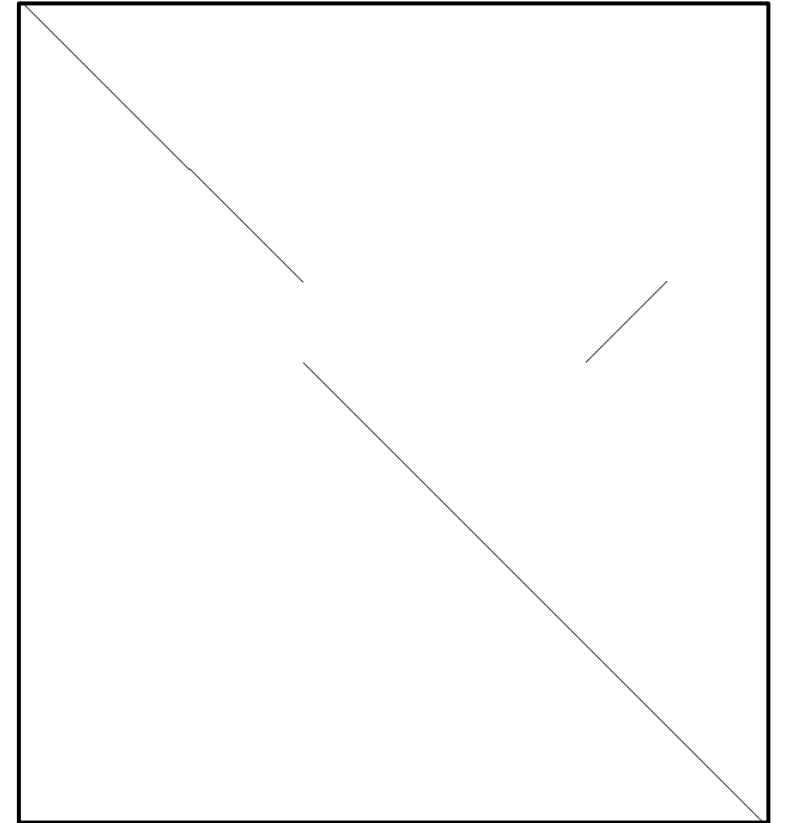

❖ chr4-69220529-69274512

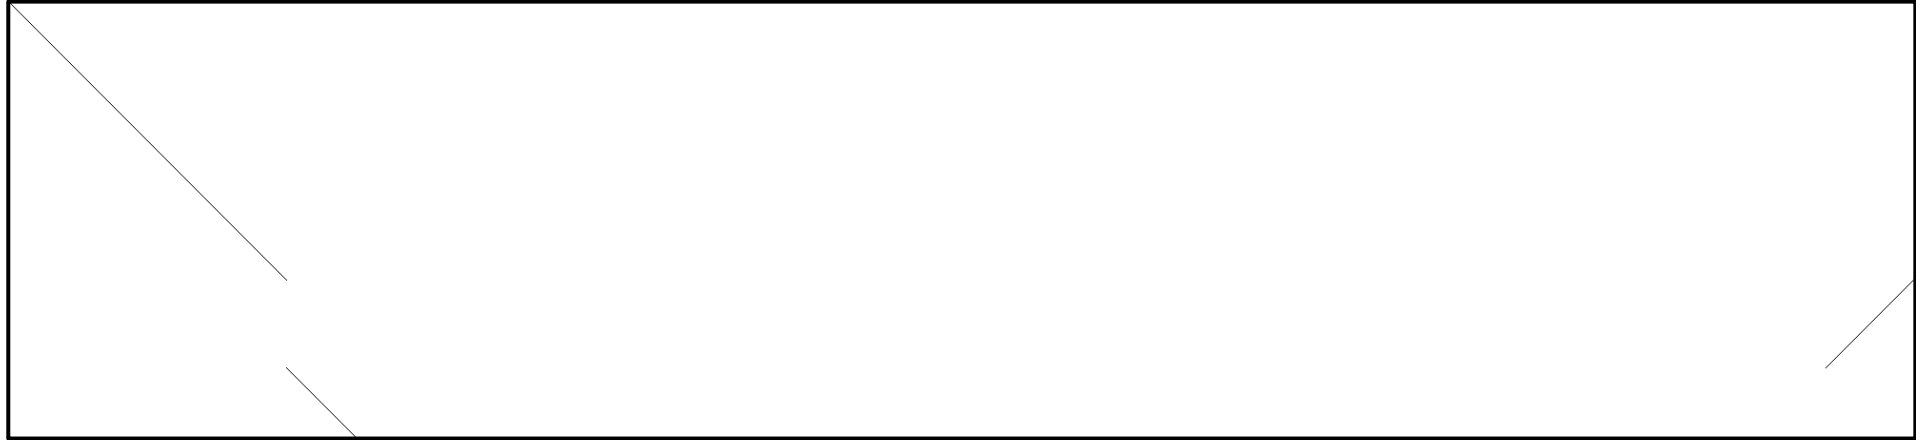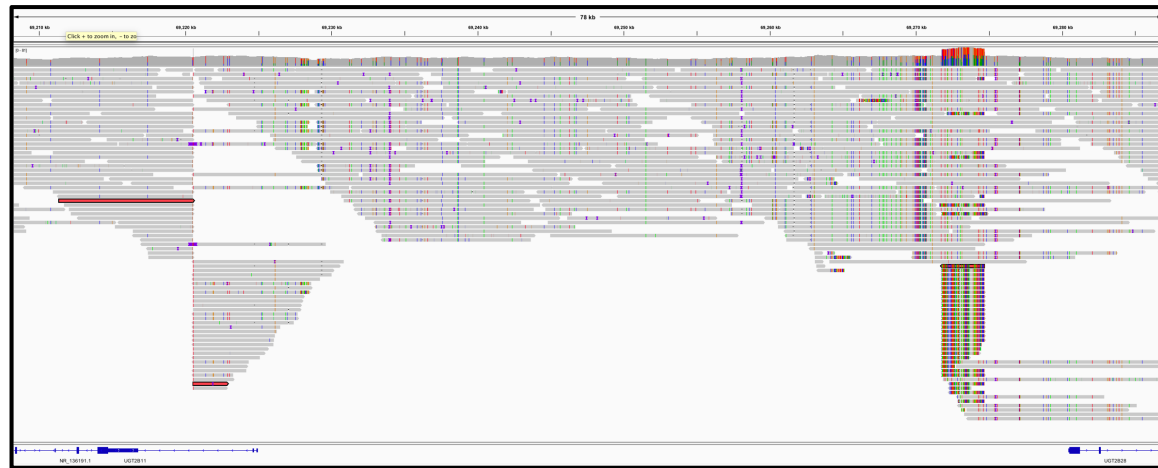

Supplementary File 2

❖ chr4-162657531-162658465

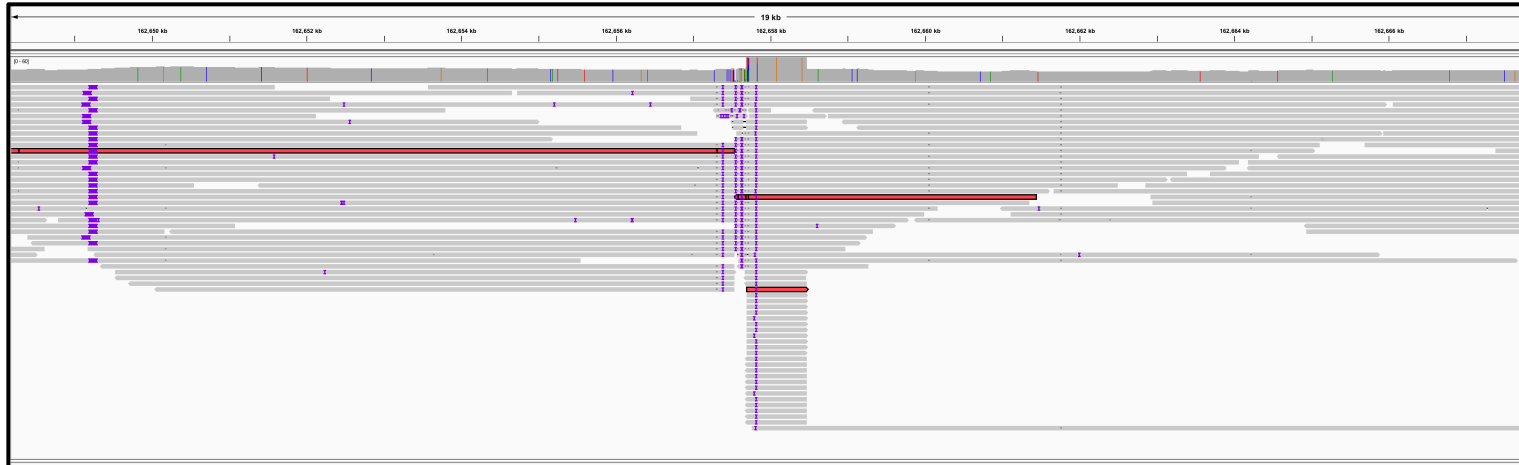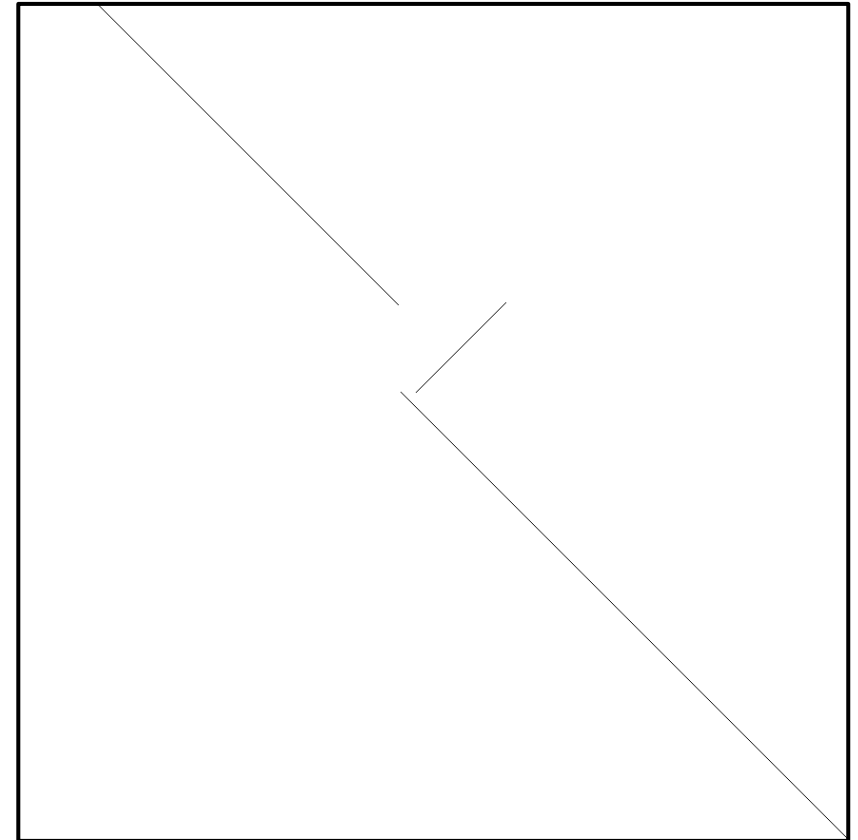

❖ **chr9-105054361-105055065**

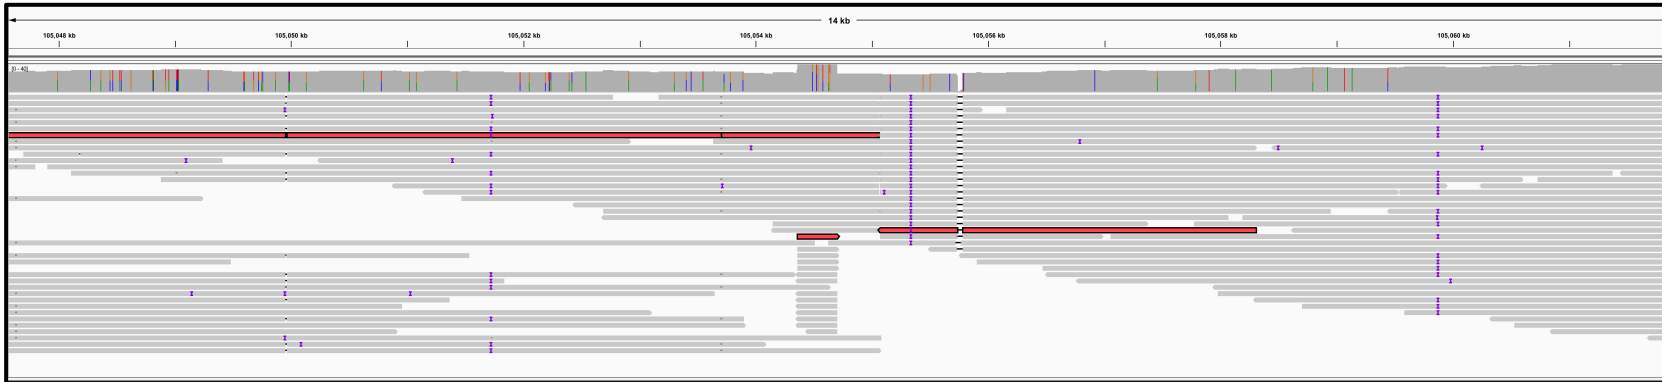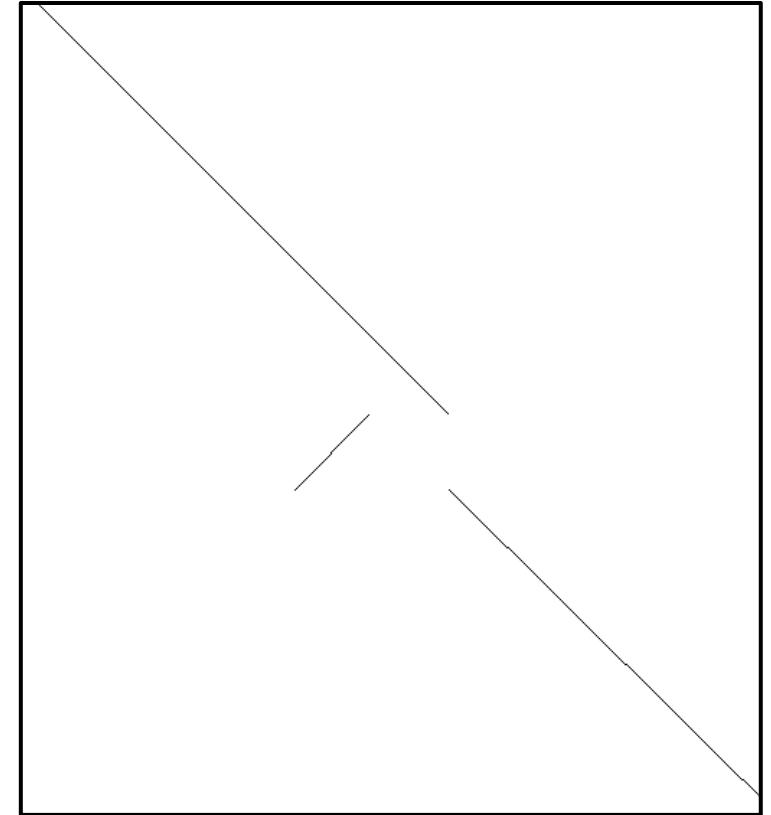

❖ chr12-71315487-71316538

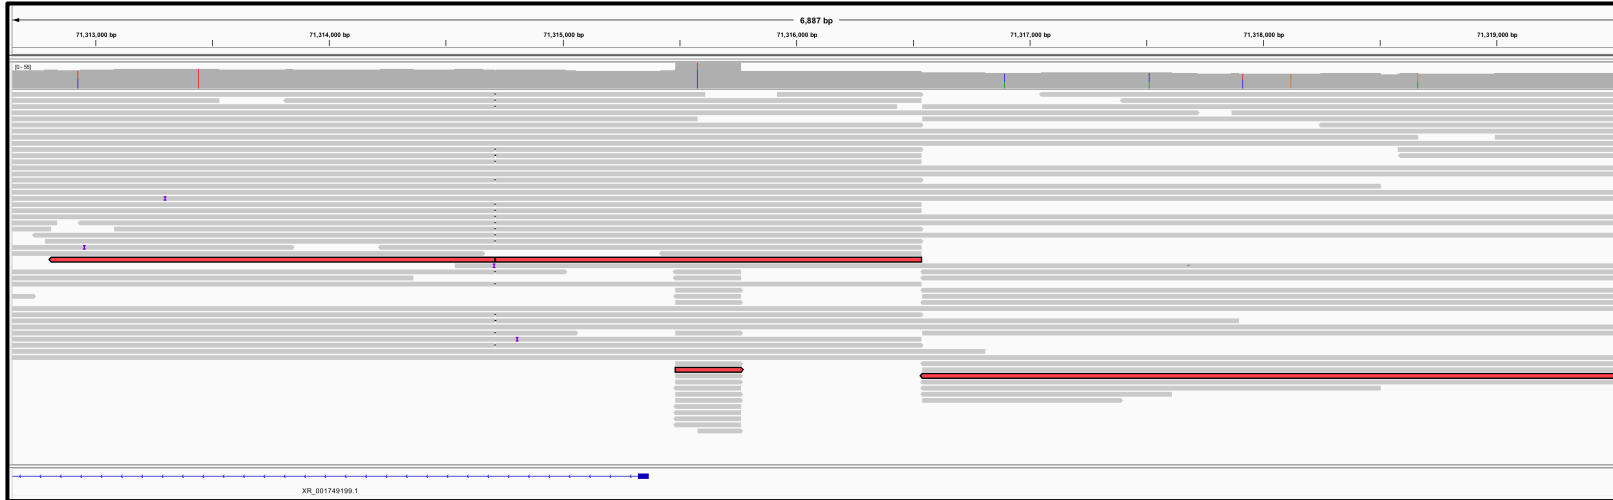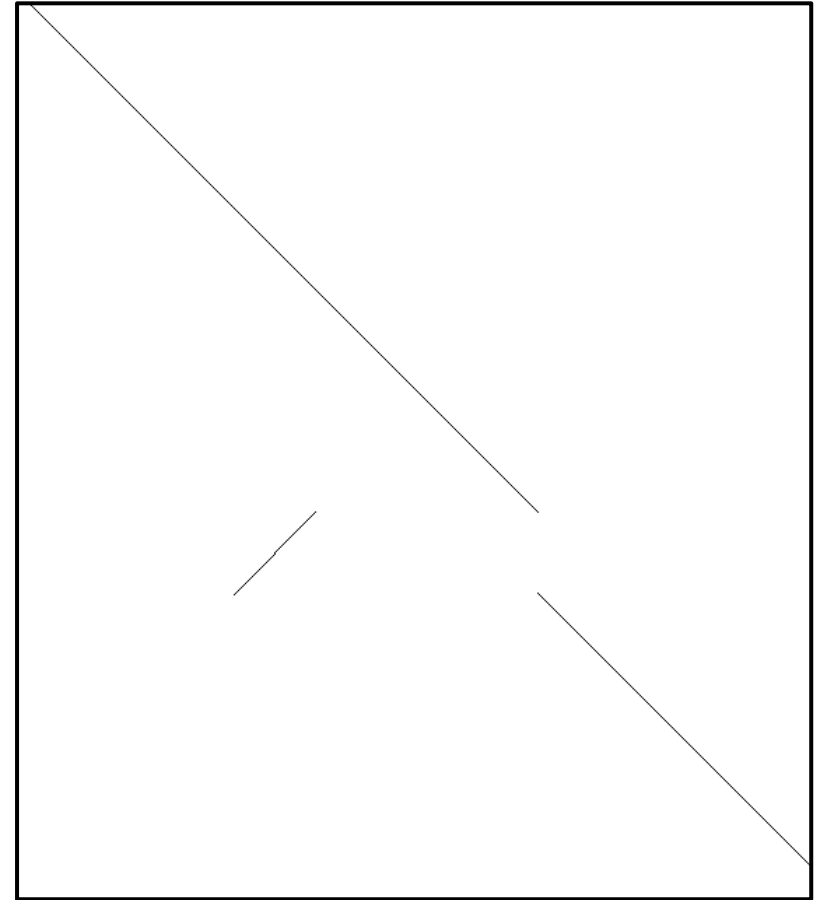

❖ **chr12-77990099-77994485**

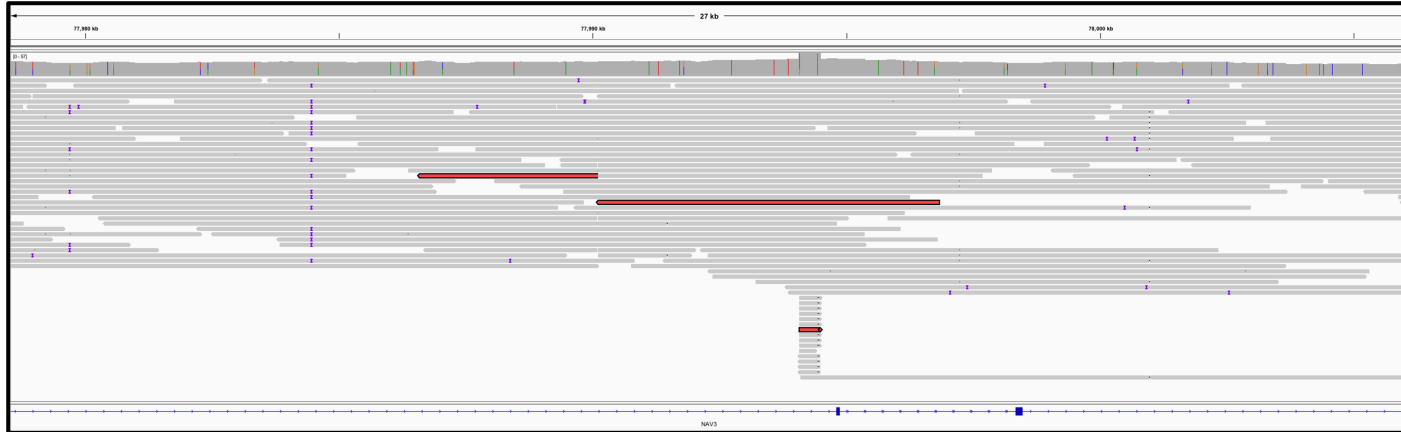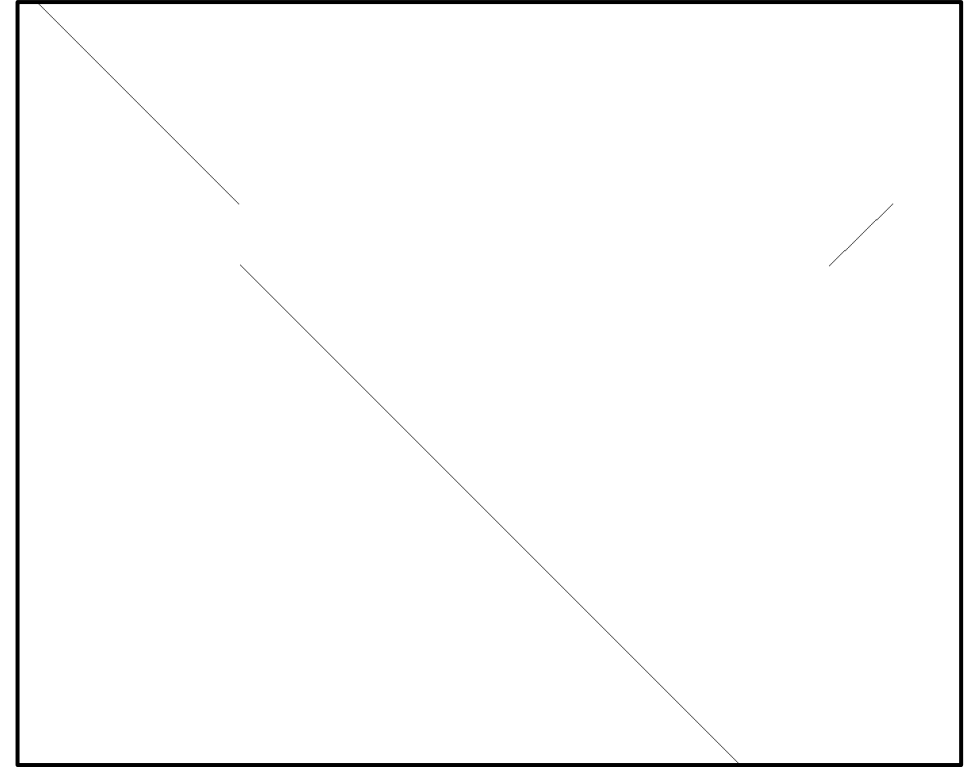

❖ chr14-47854765-47856277

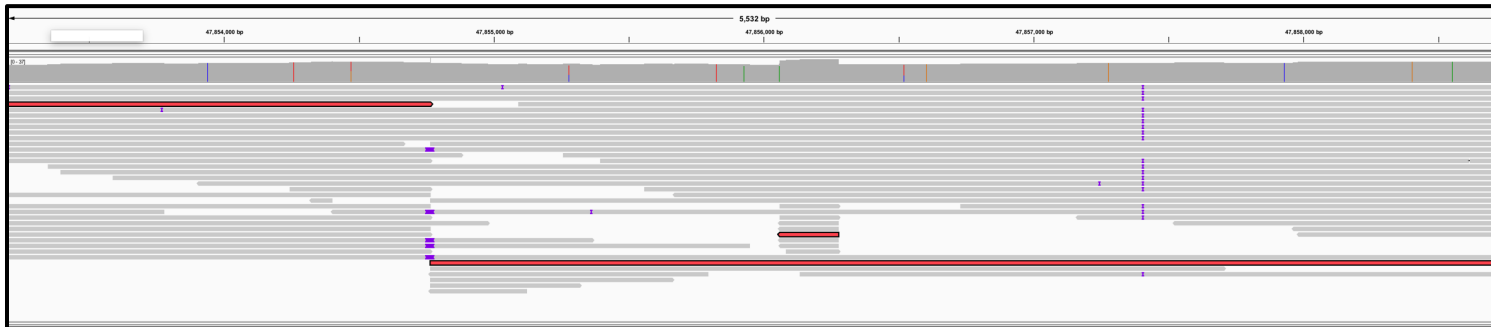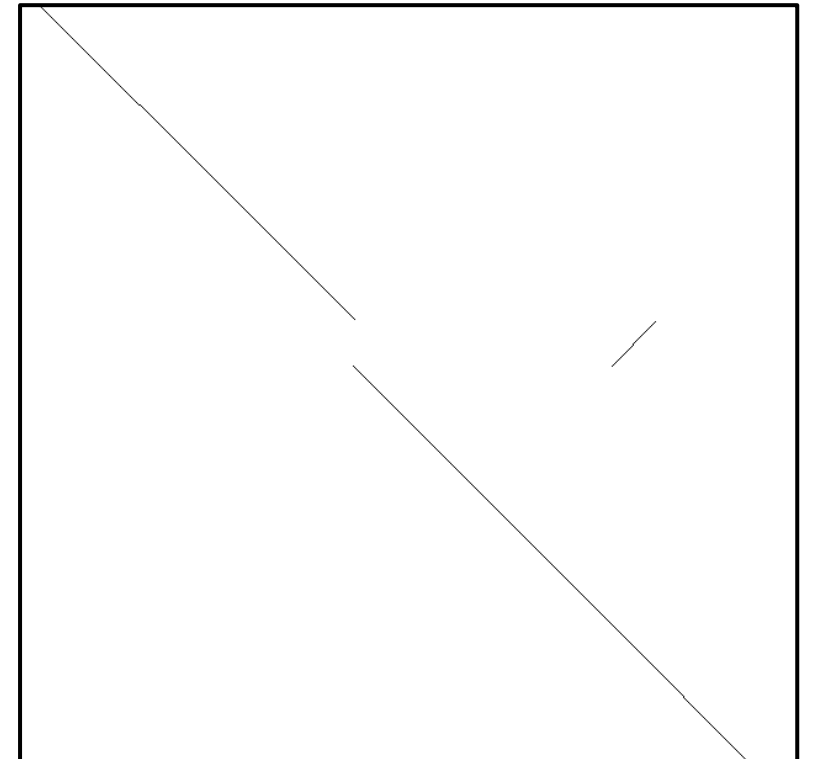



❖ chr16-69727929-69728992

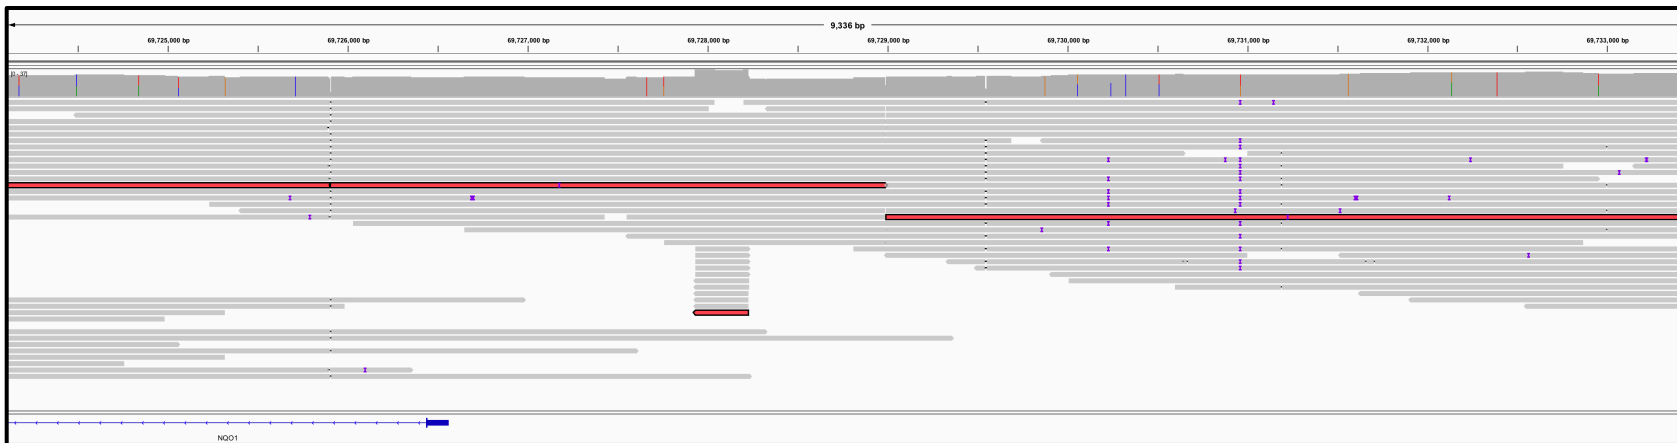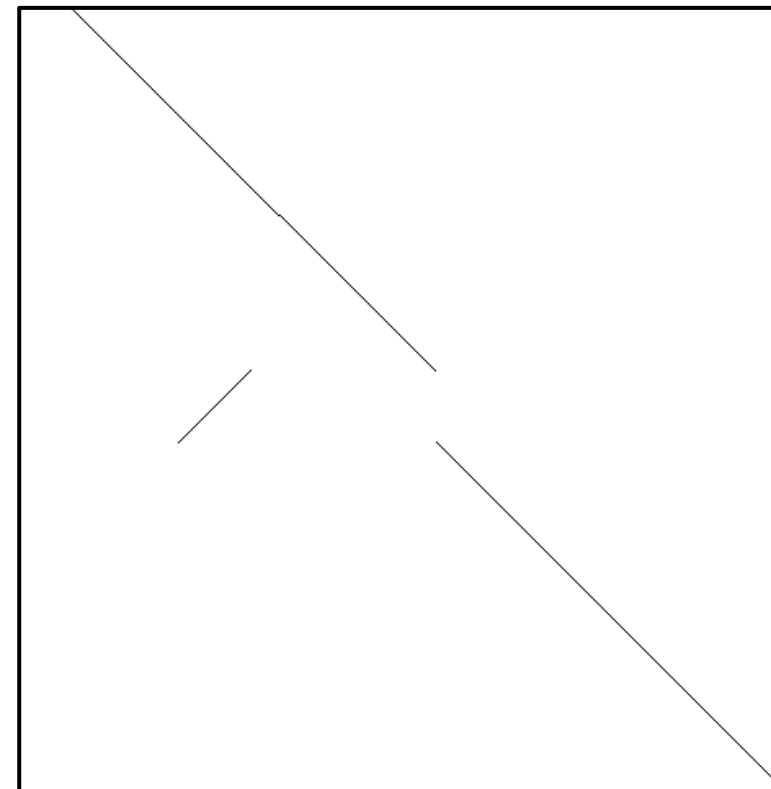

❖ chr17-34854678-34855853

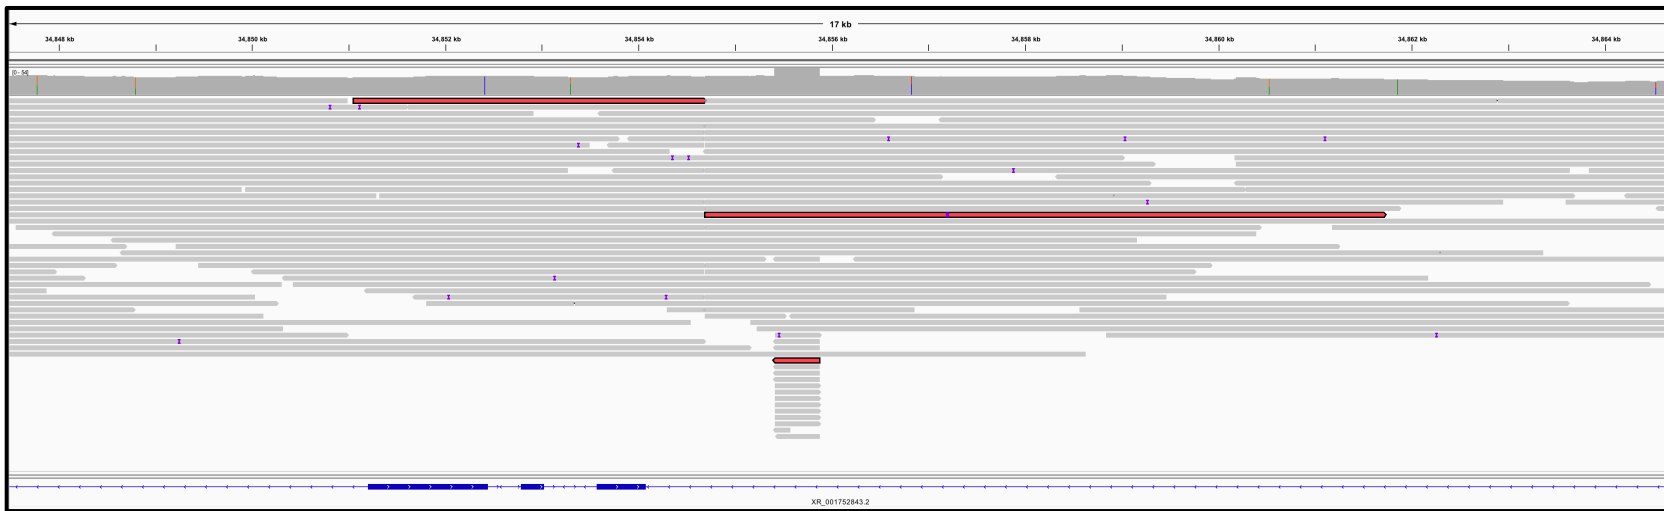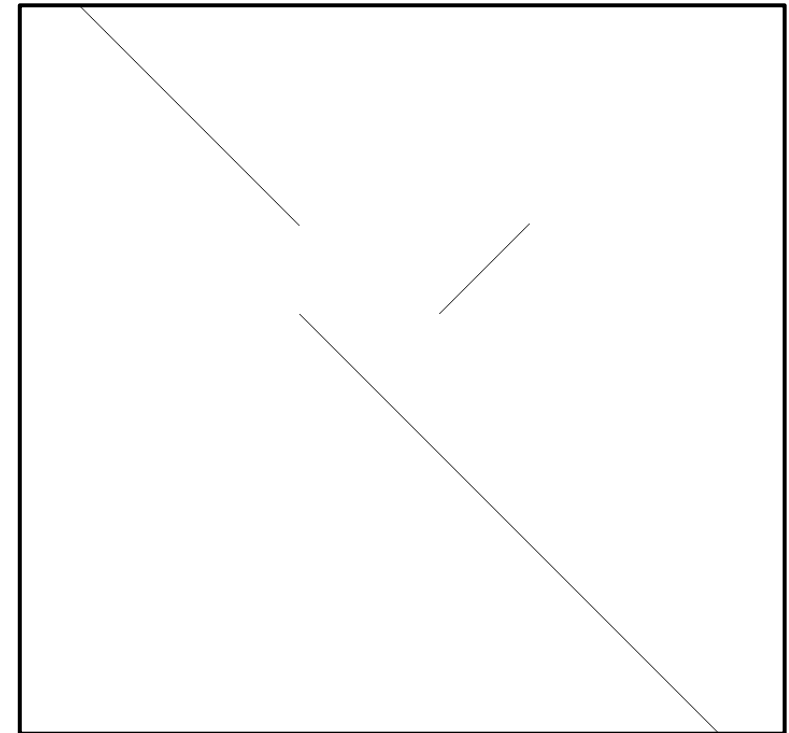

# GraphID-15, deletion-inversion

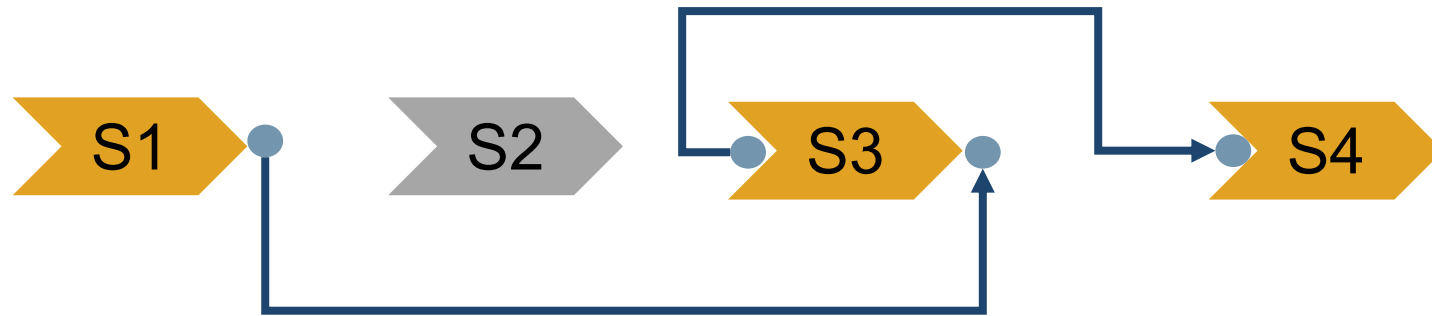

Nodes=S:4

❖ chr1-187495696-187497594

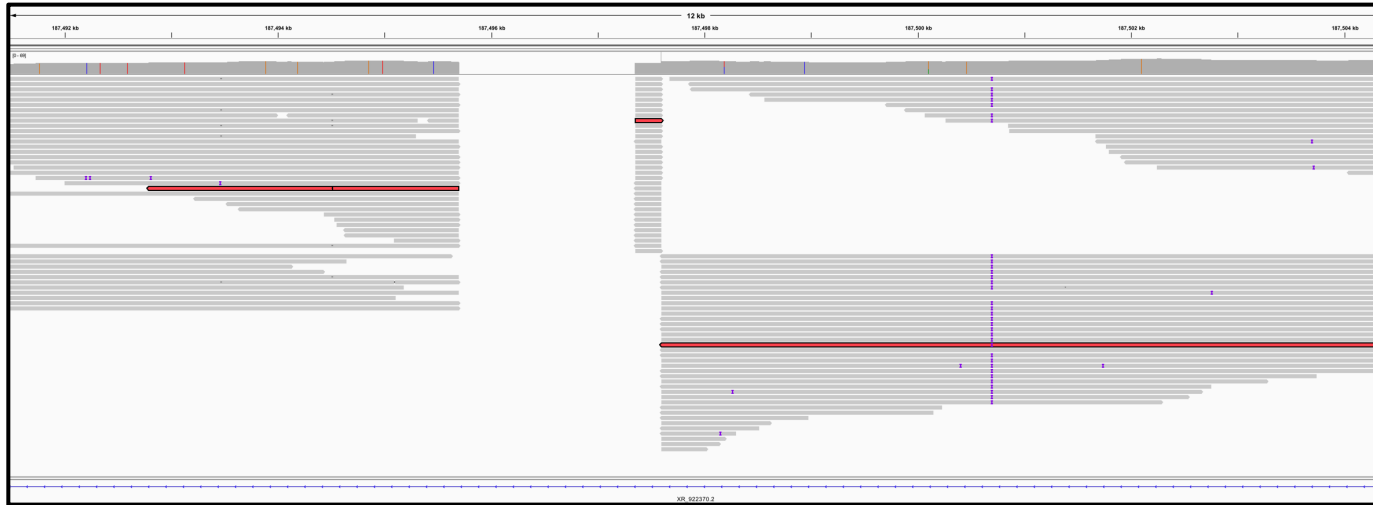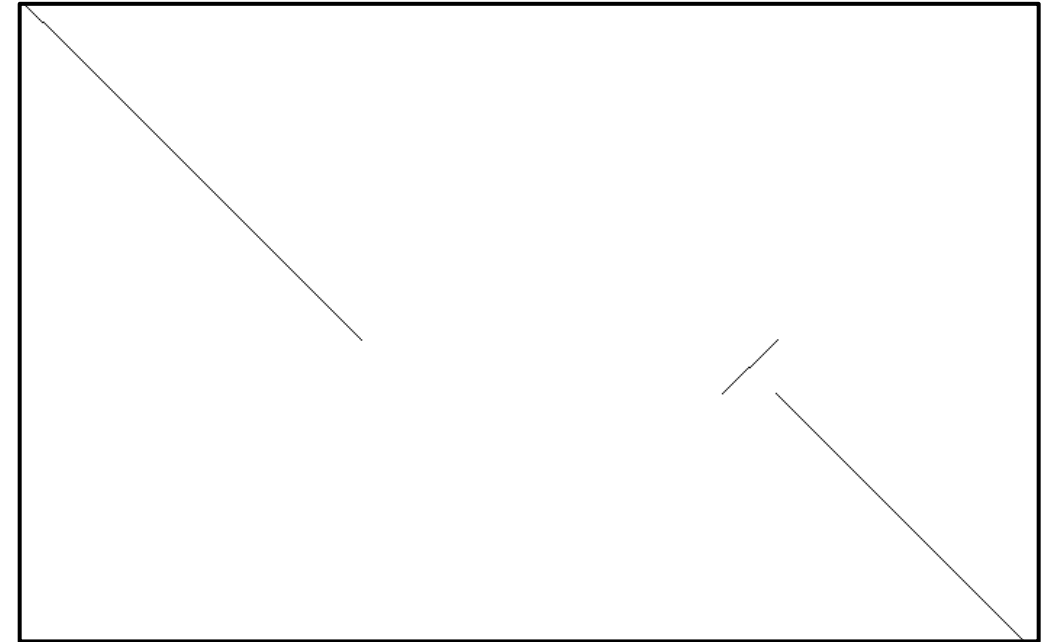

❖ chr3-162807955-162829868

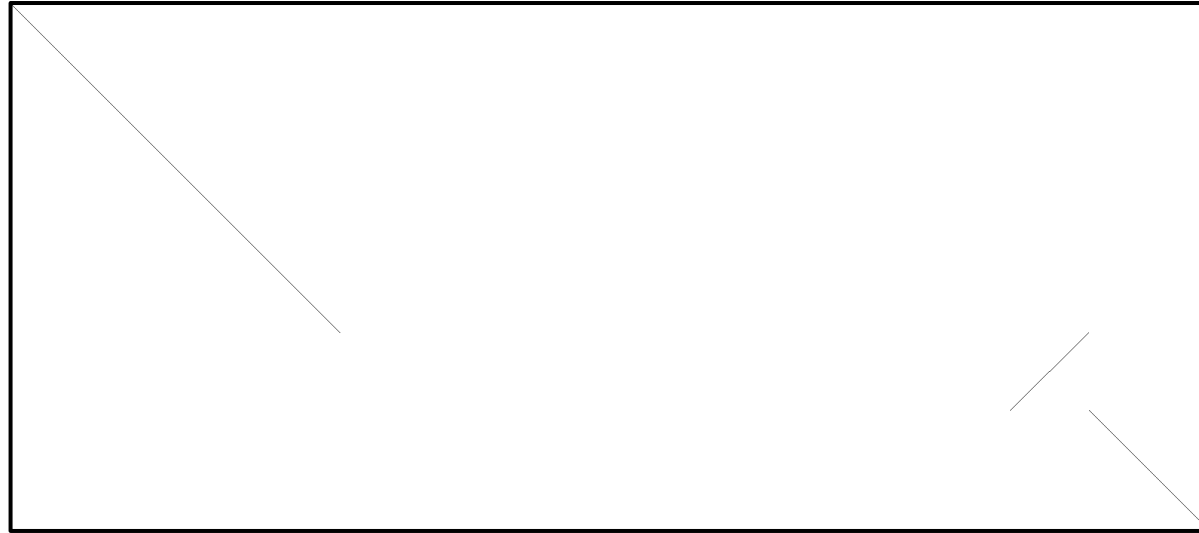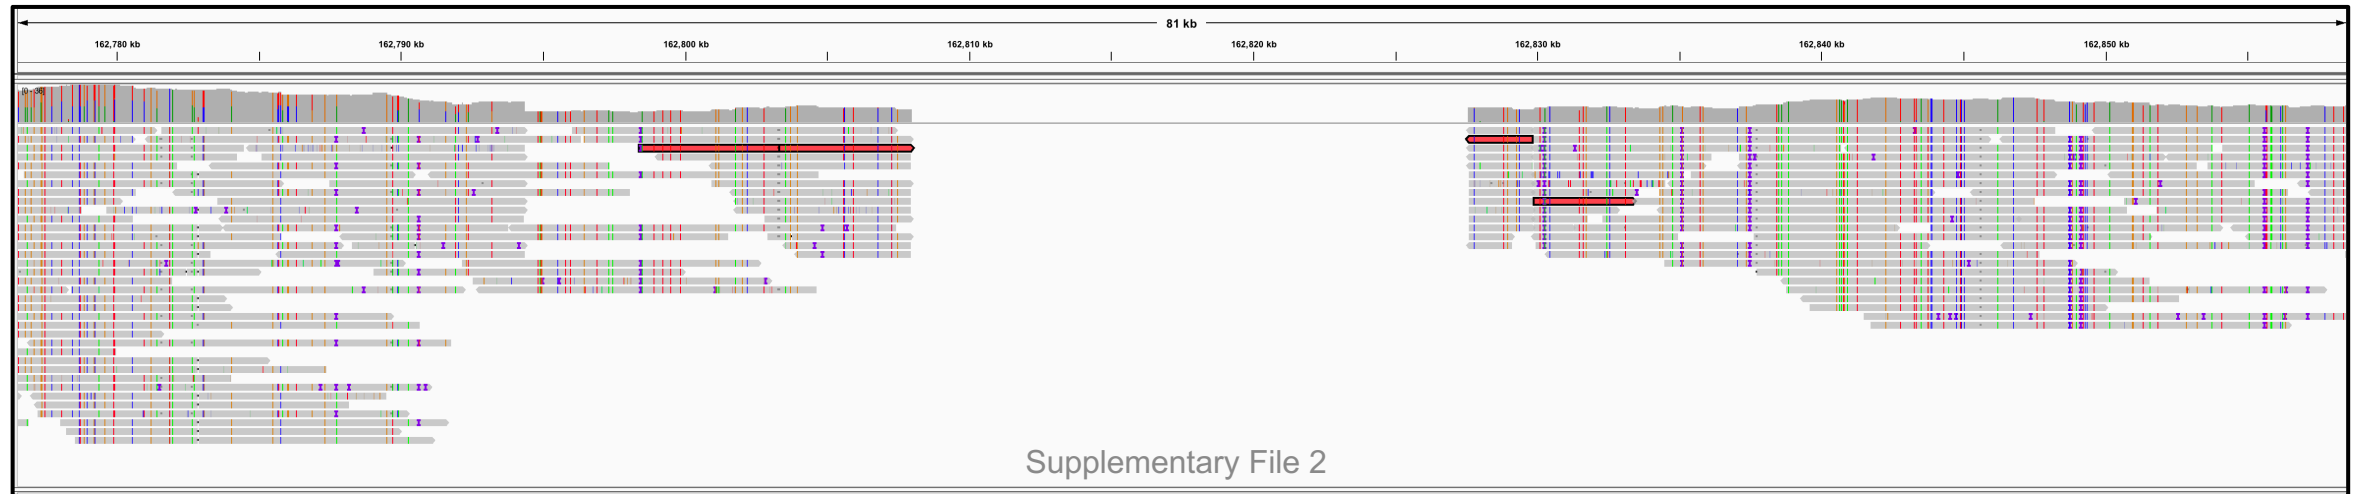

❖ chr9-29591760-29592481

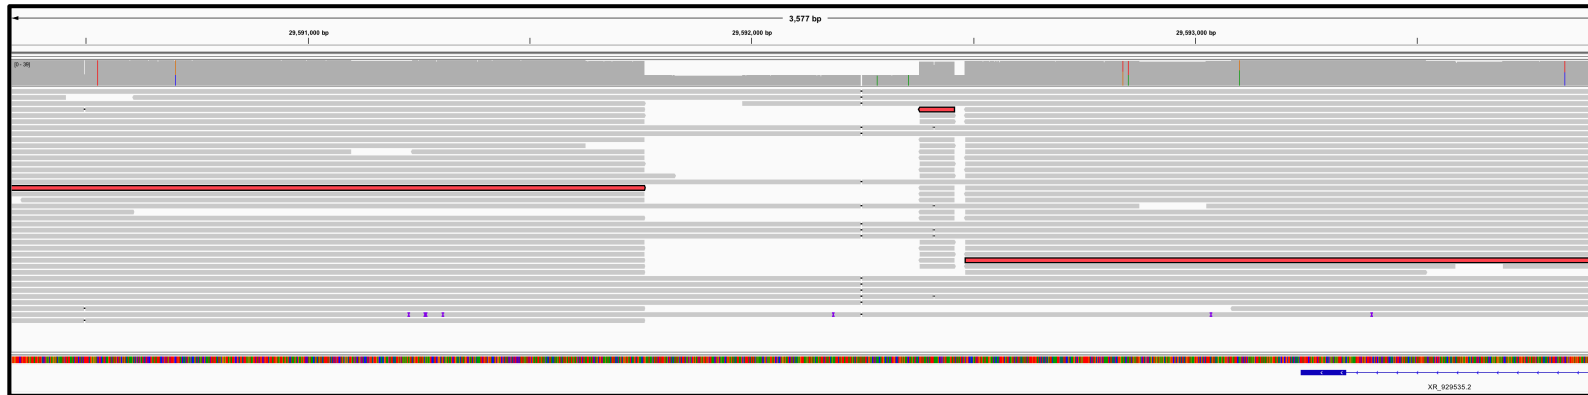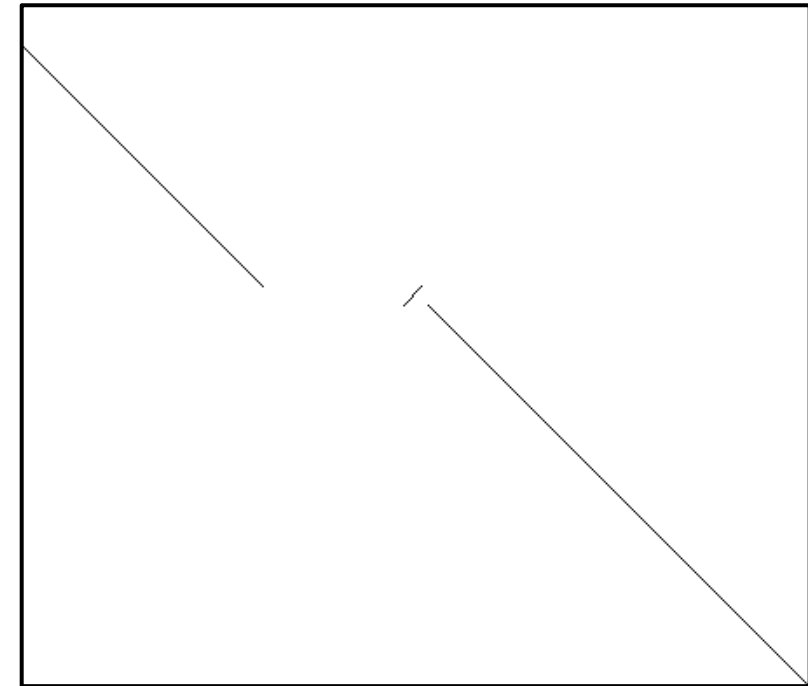

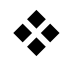

# chr9-86539643-86541026

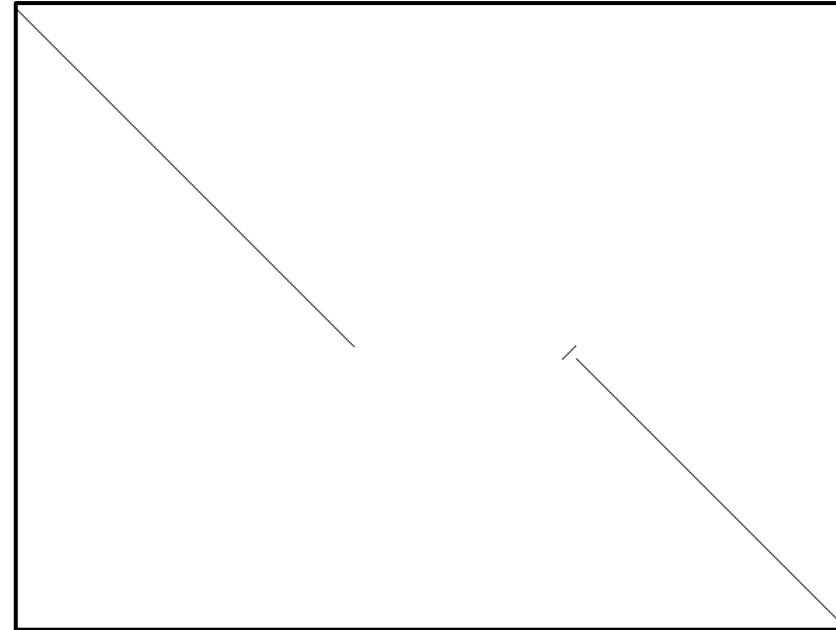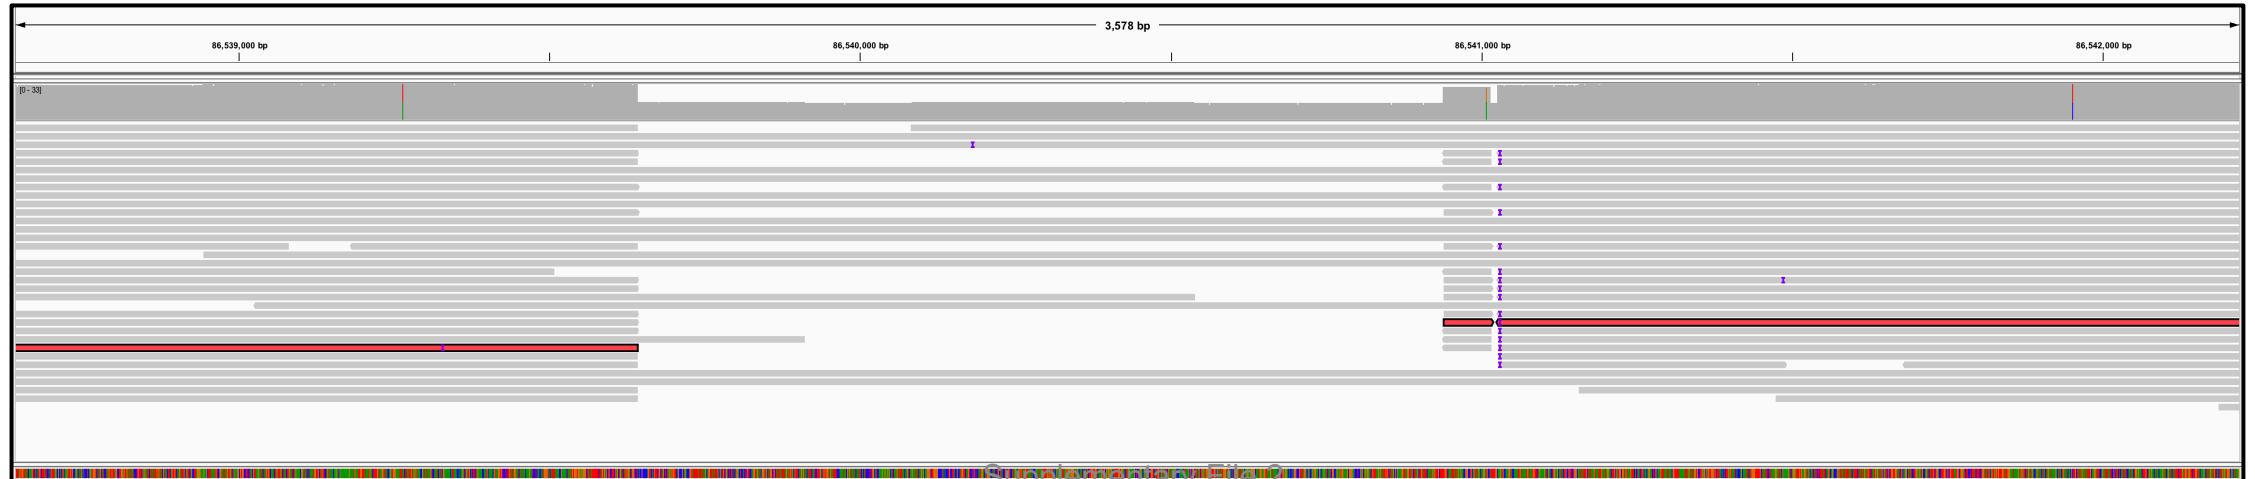

❖ **chr10-57497186-57498223**

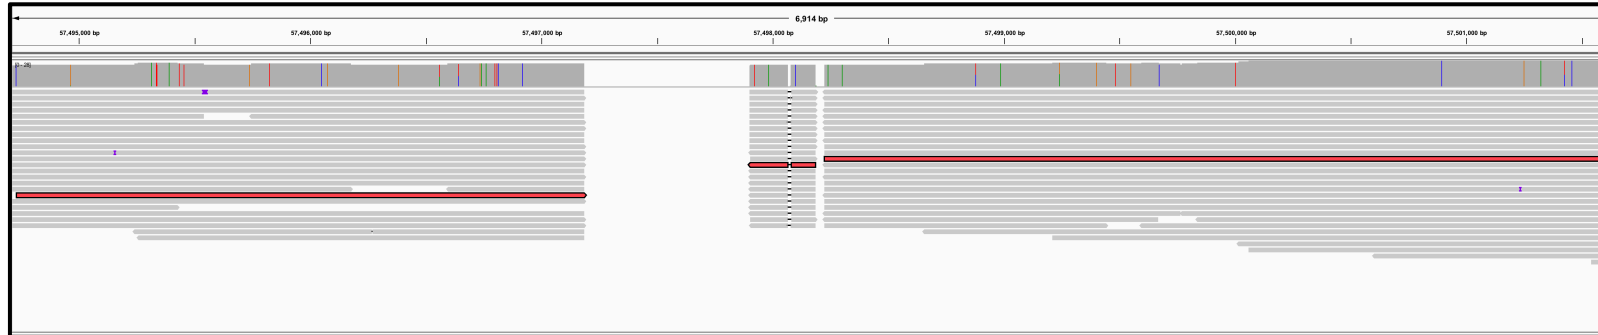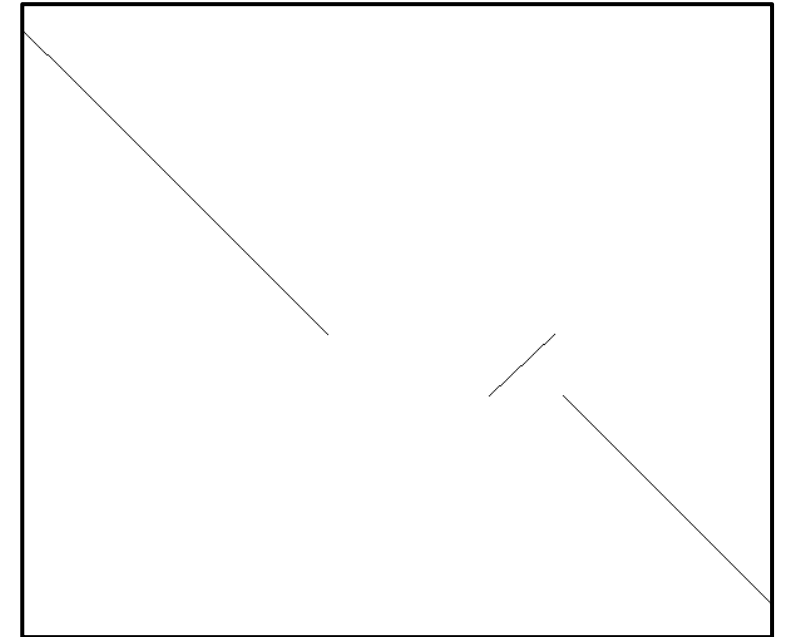



❖ chr12-39466255-39466532

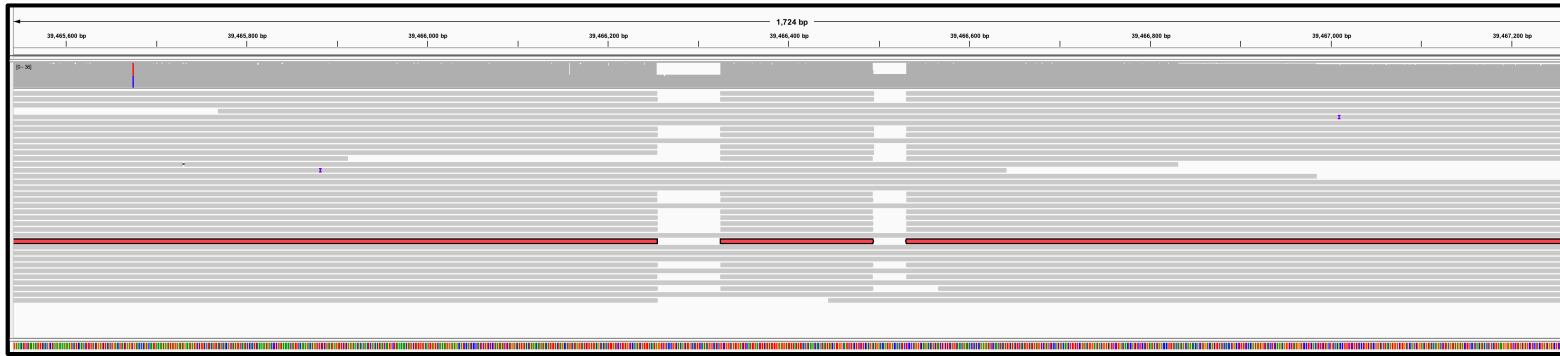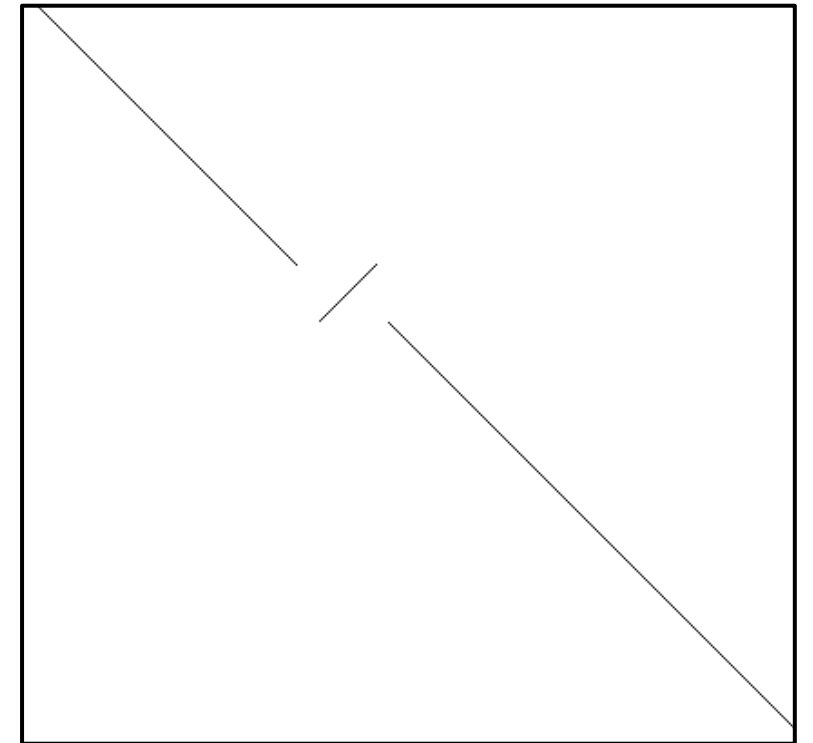

❖ chr14-65375820-65376415

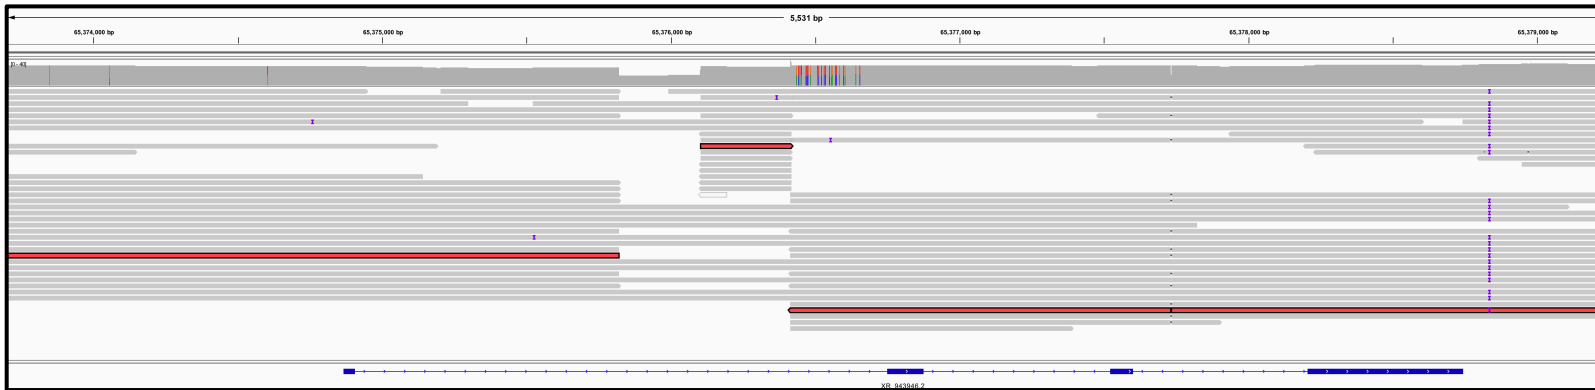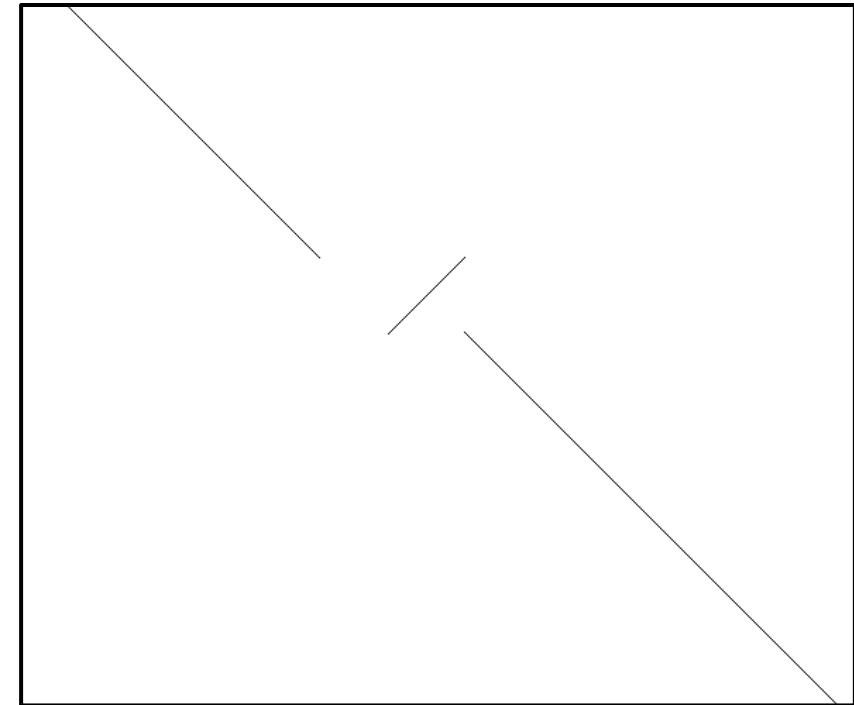

❖ chr16-48871382-48872323

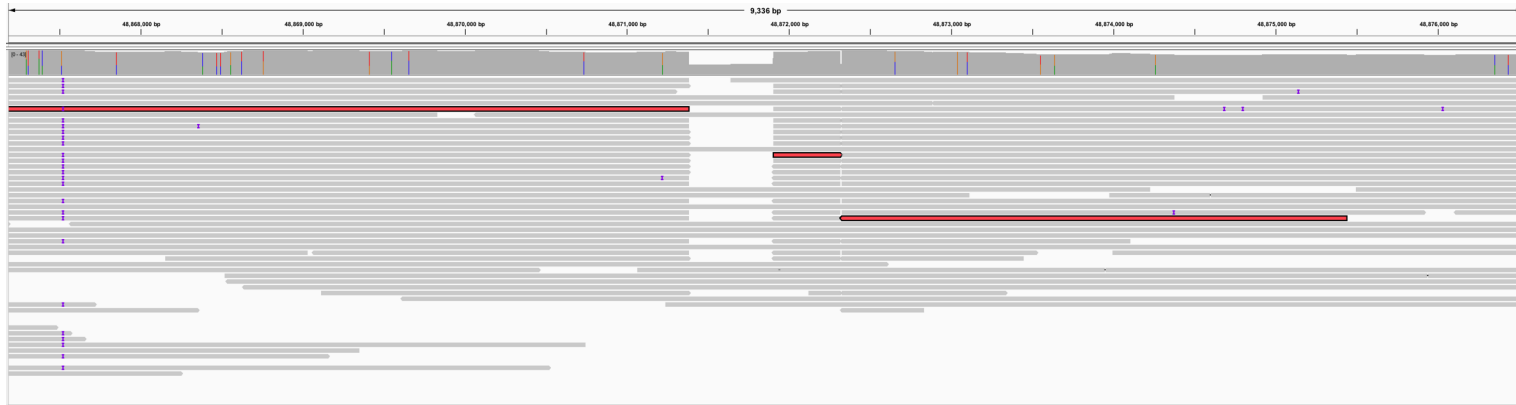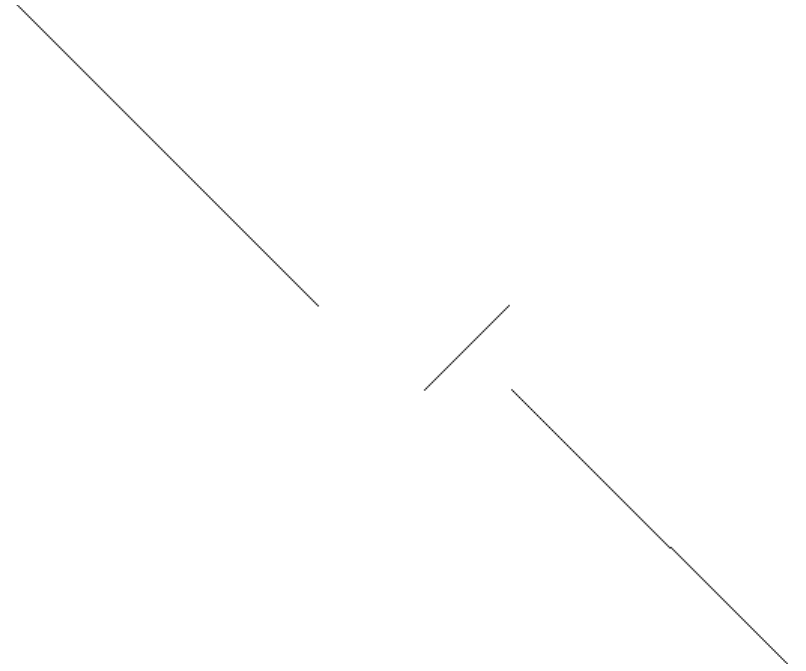

# GraphID-27, deletion-spacer-deletion

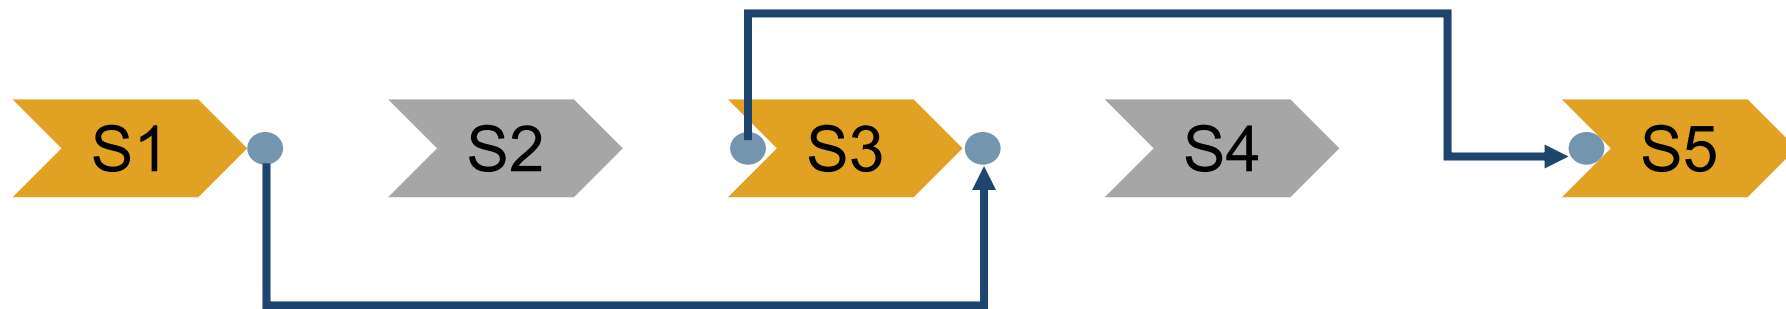

Nodes=S:5

❖ chr3-41320665-41321935

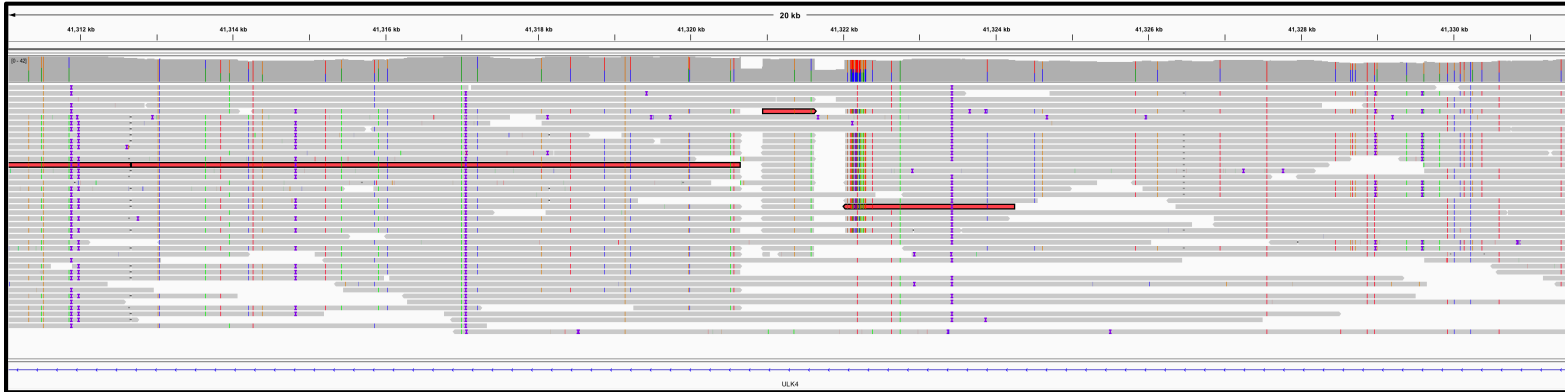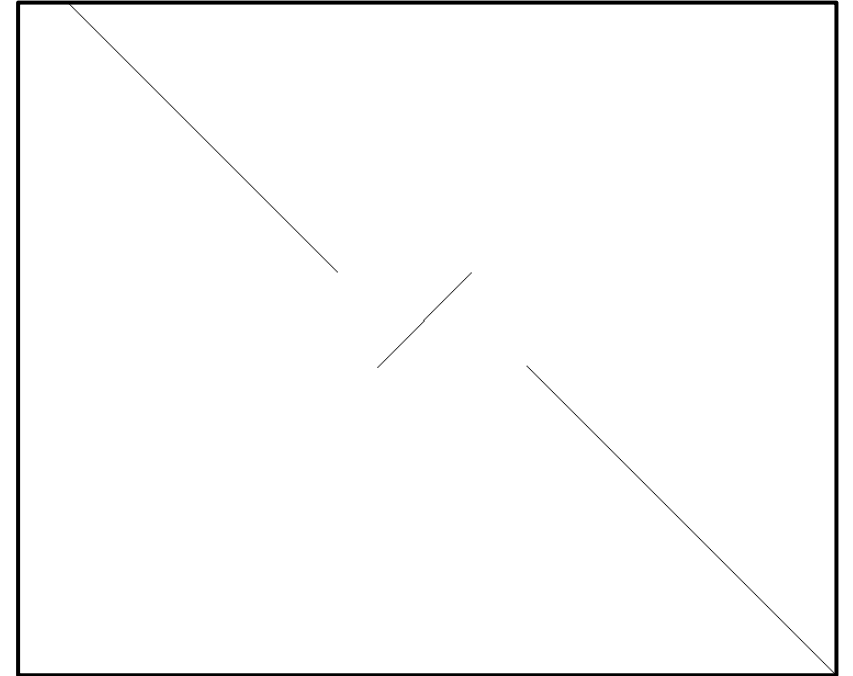

❖ chr5-148173476-148175199

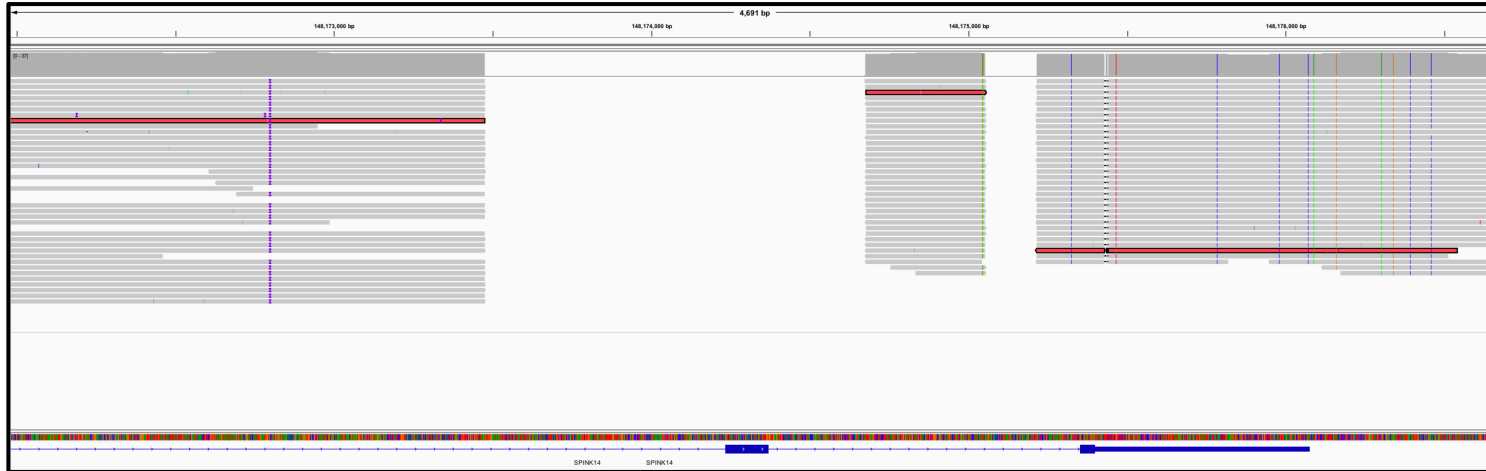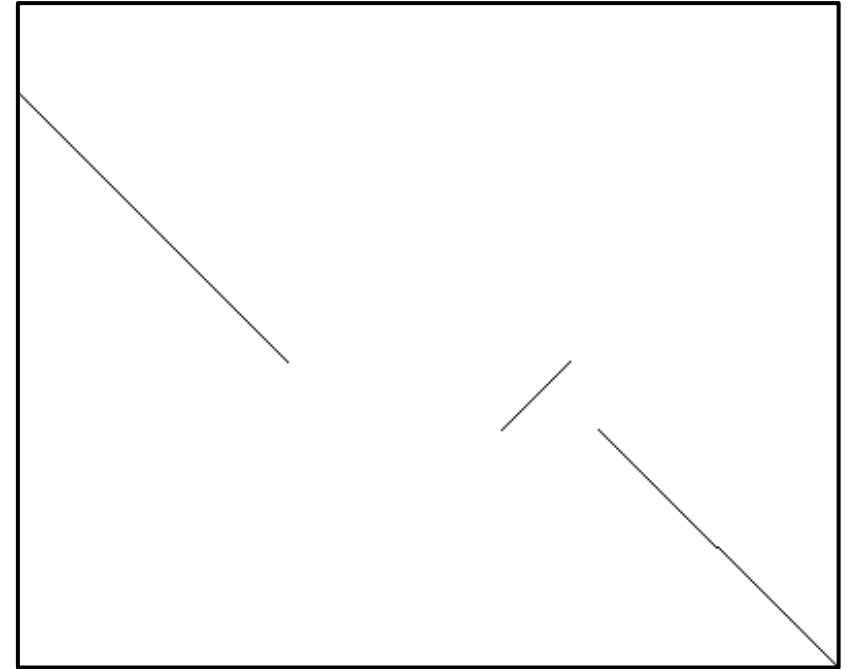

❖ chr7-102081266-102084757

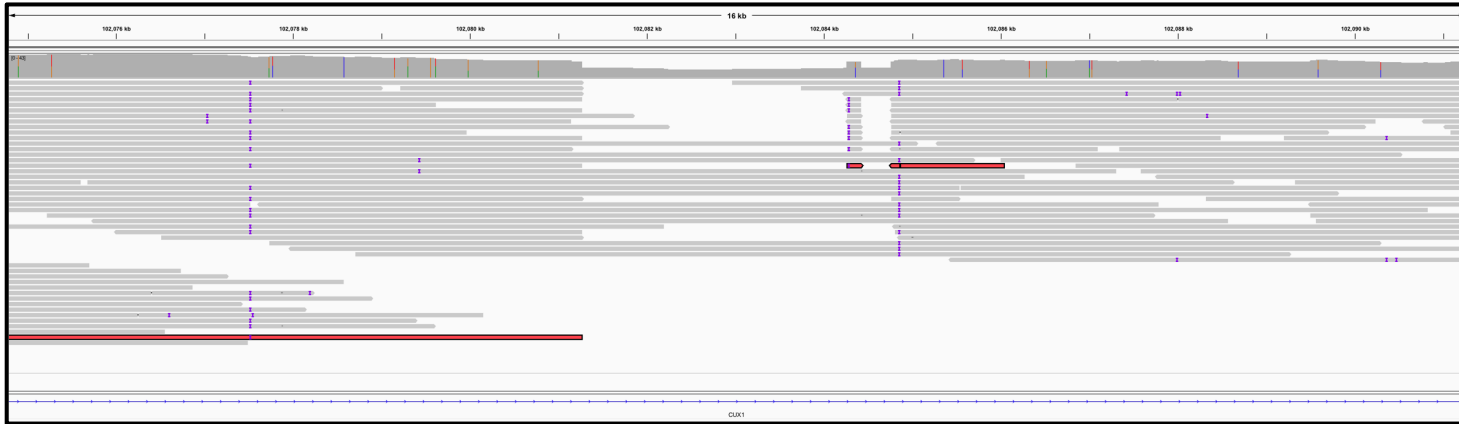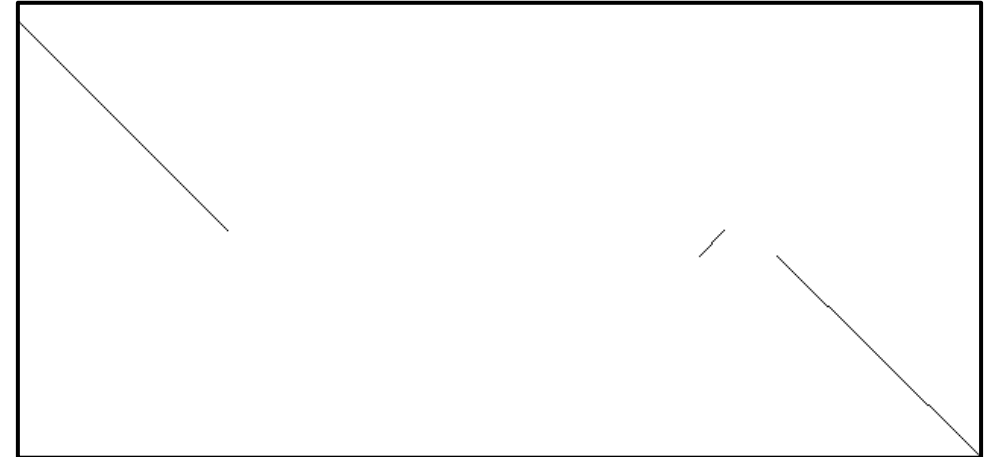

❖ **chr9-62806327-62822799**

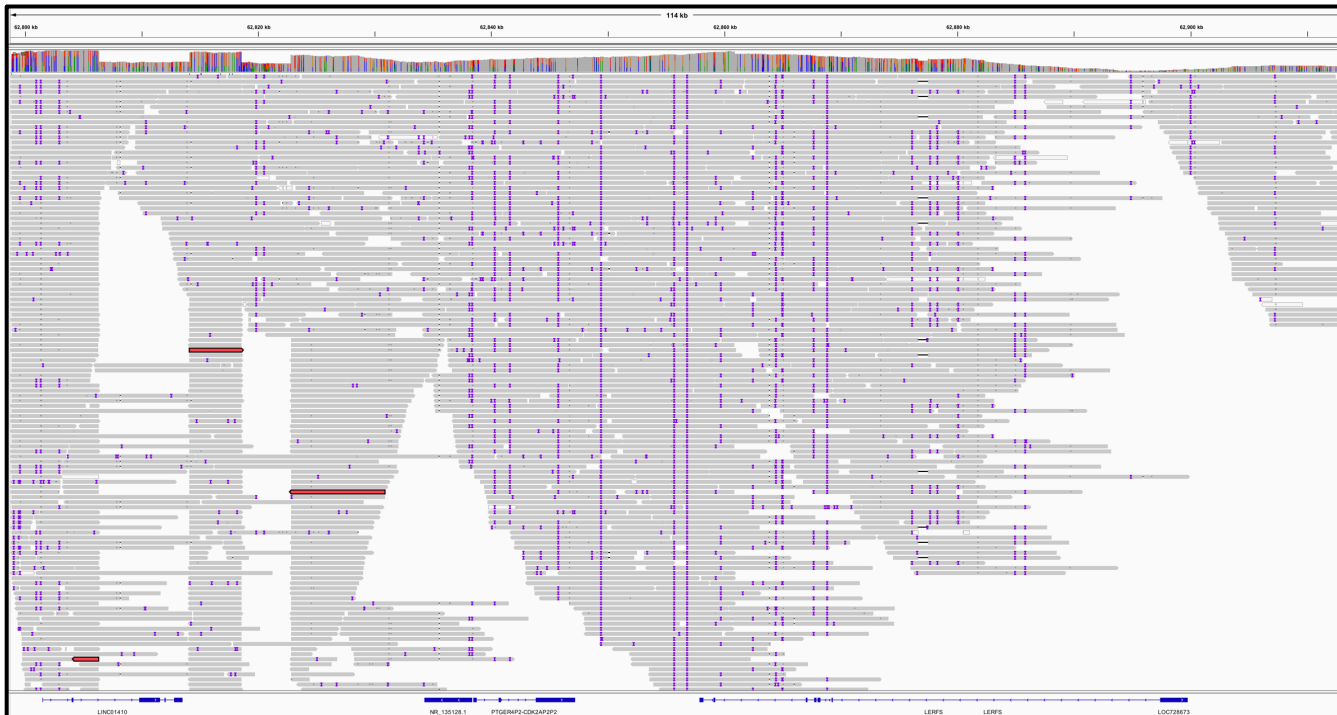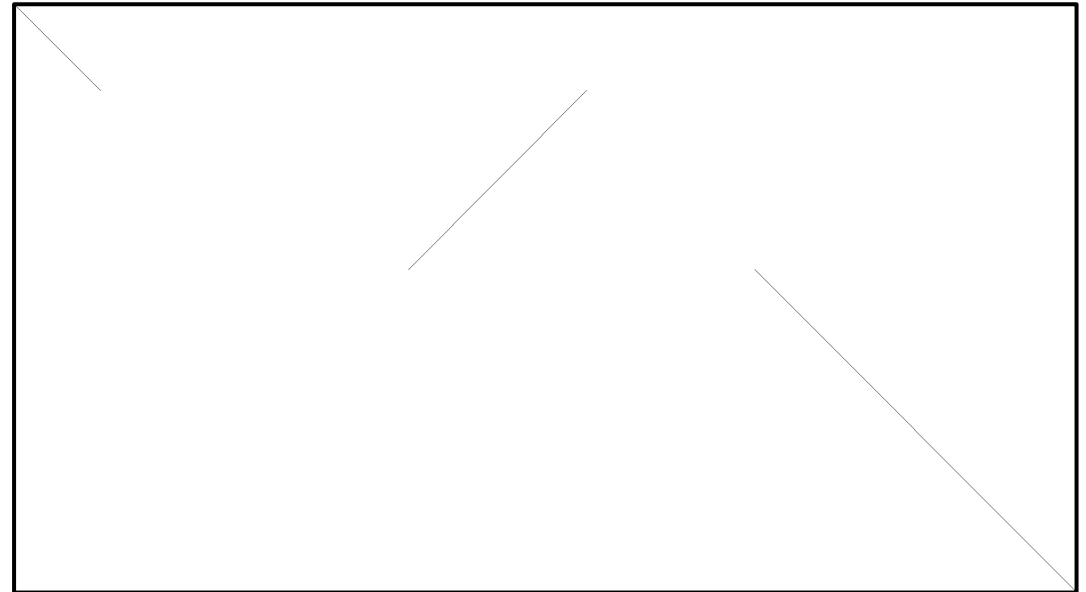



❖ chr14-25142261-25144518

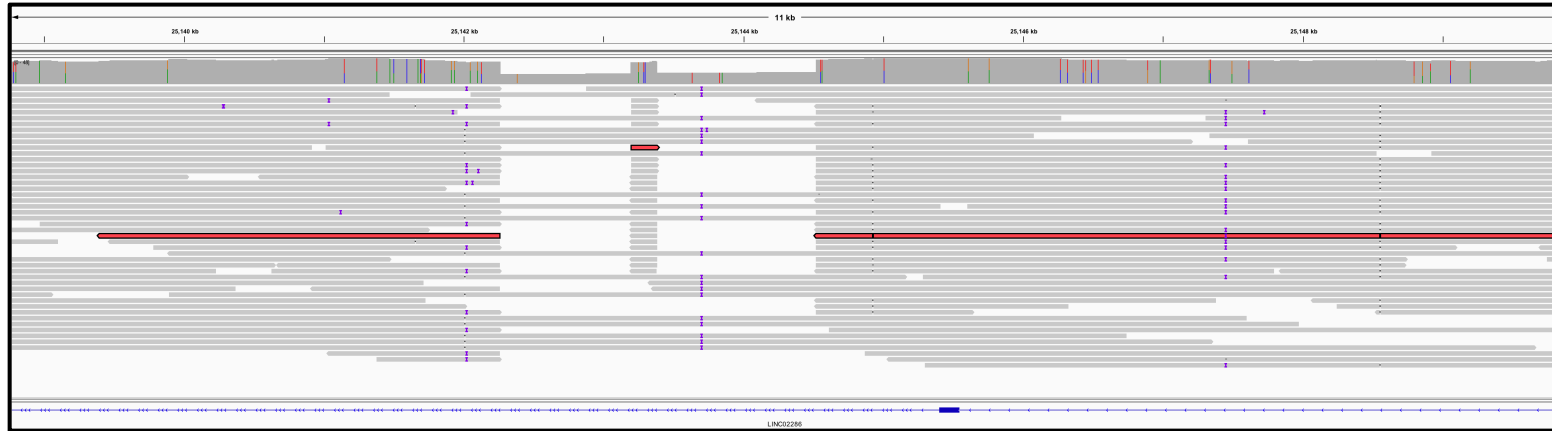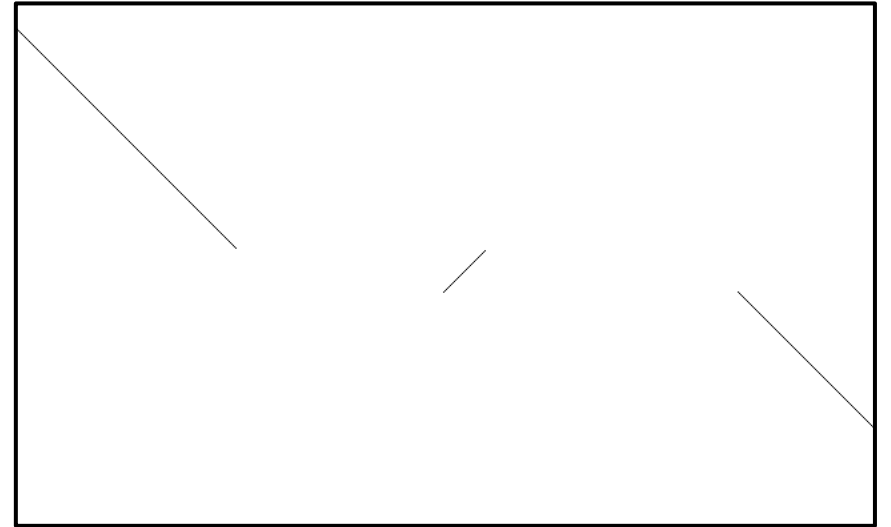

# GraphID-23, deletion and inverted duplication

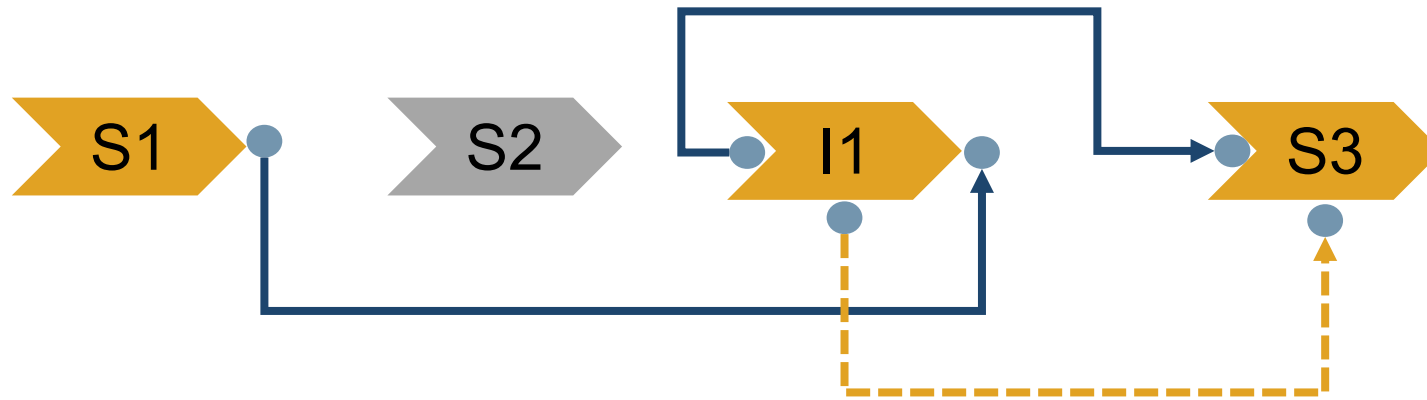

Nodes=S:3,I:1,D:1

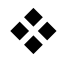

# chr2-45061833-45079498

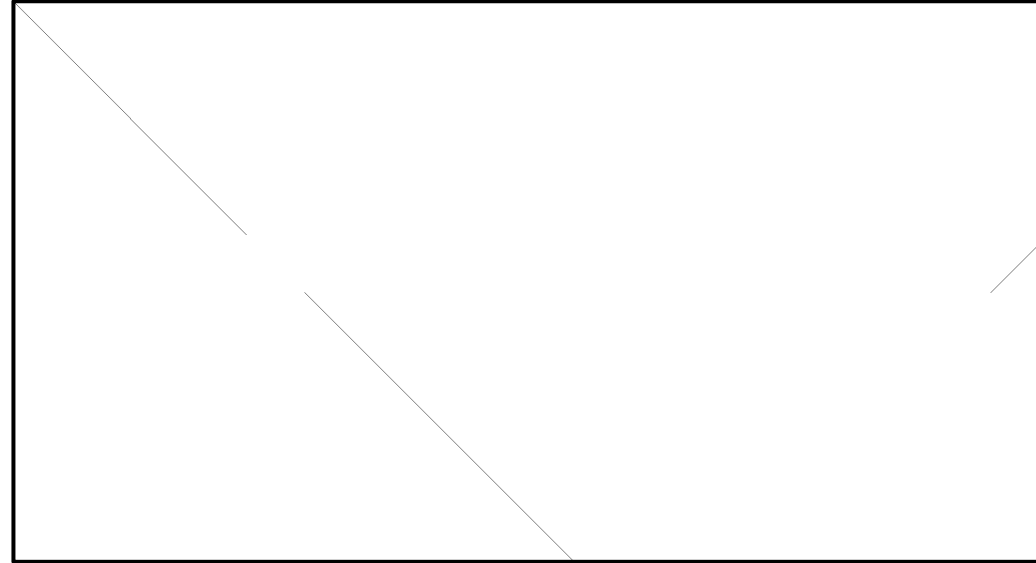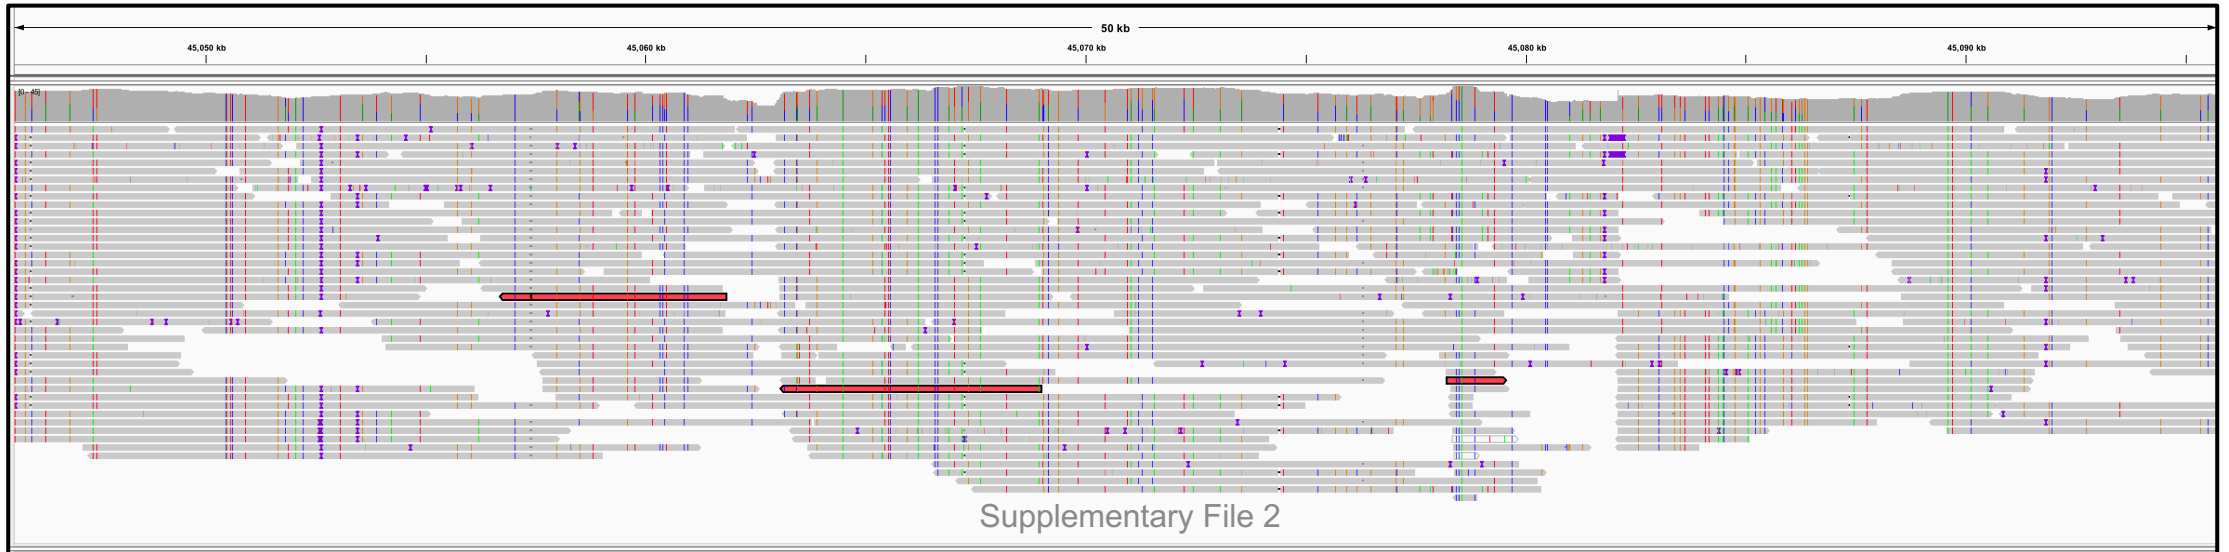

❖ **chr3-80013716-80016128**

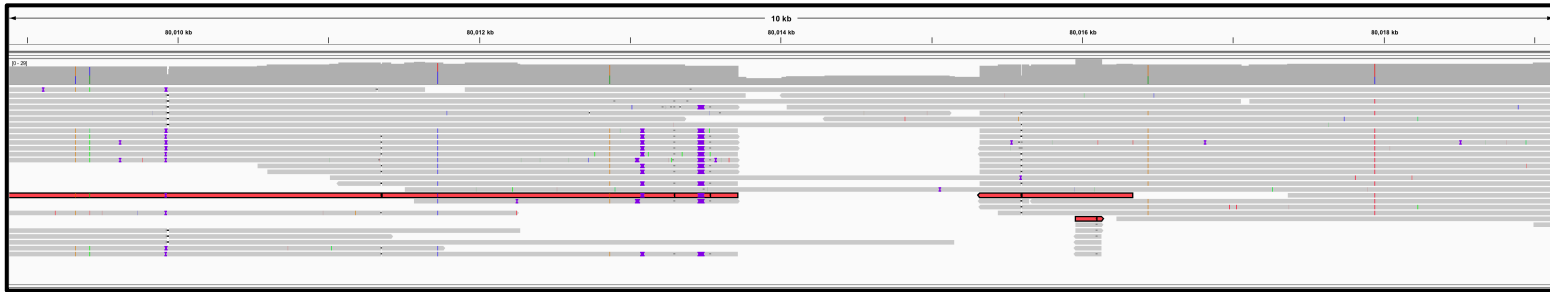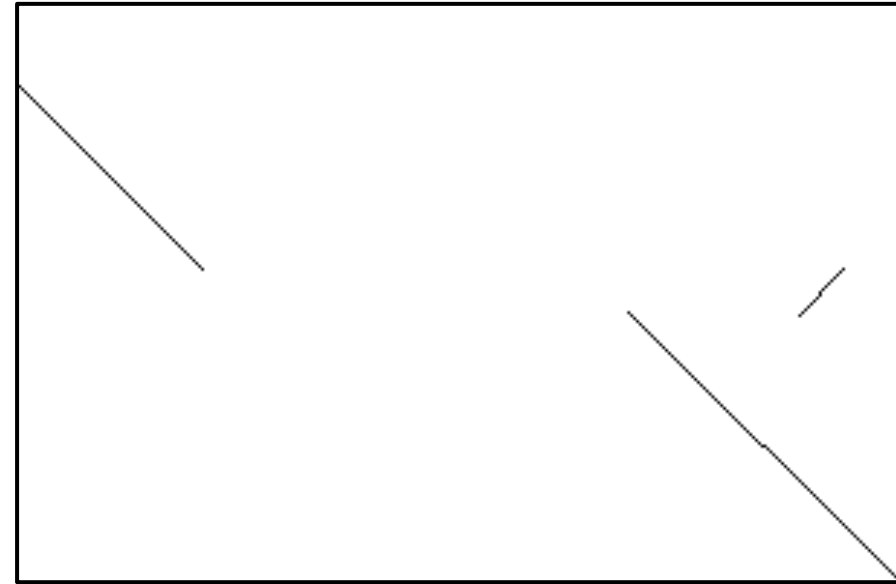

❖ chr5-28932544-28934950

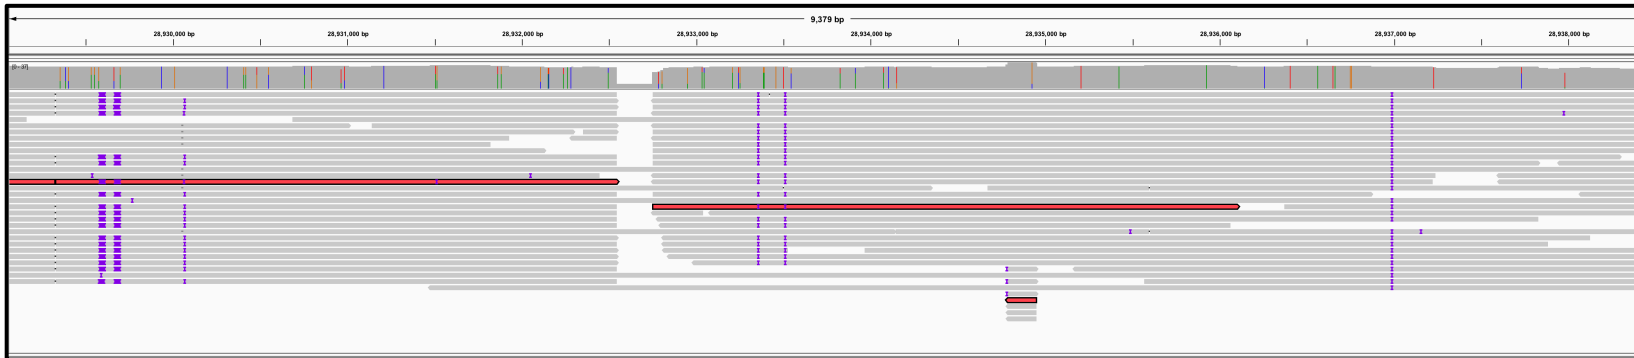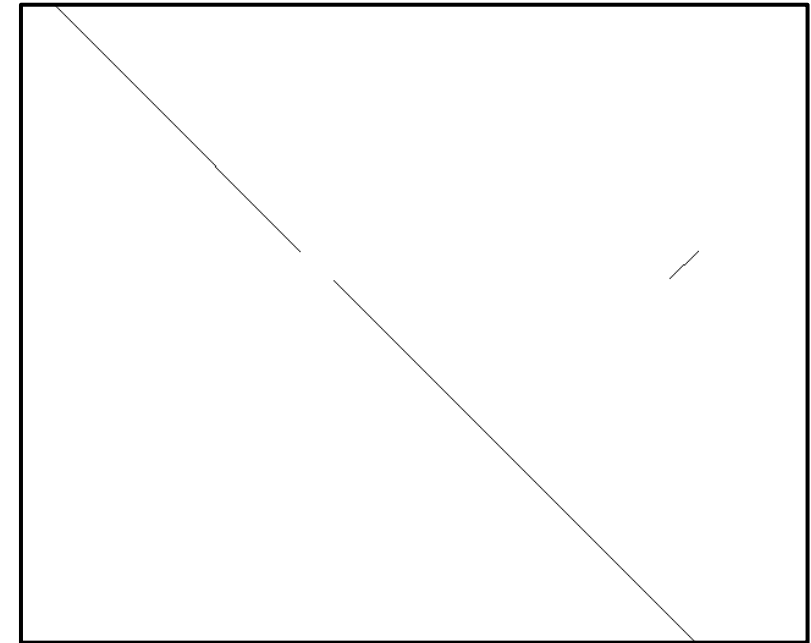

❖ **chr5-85639621-85662534**

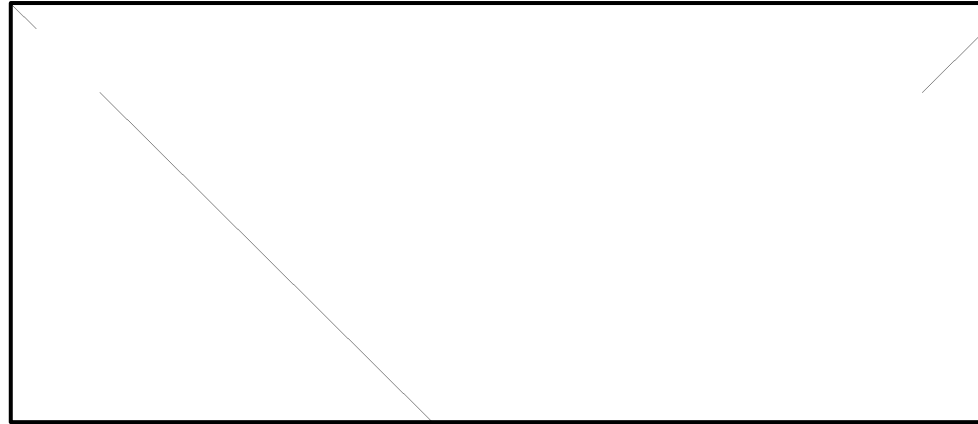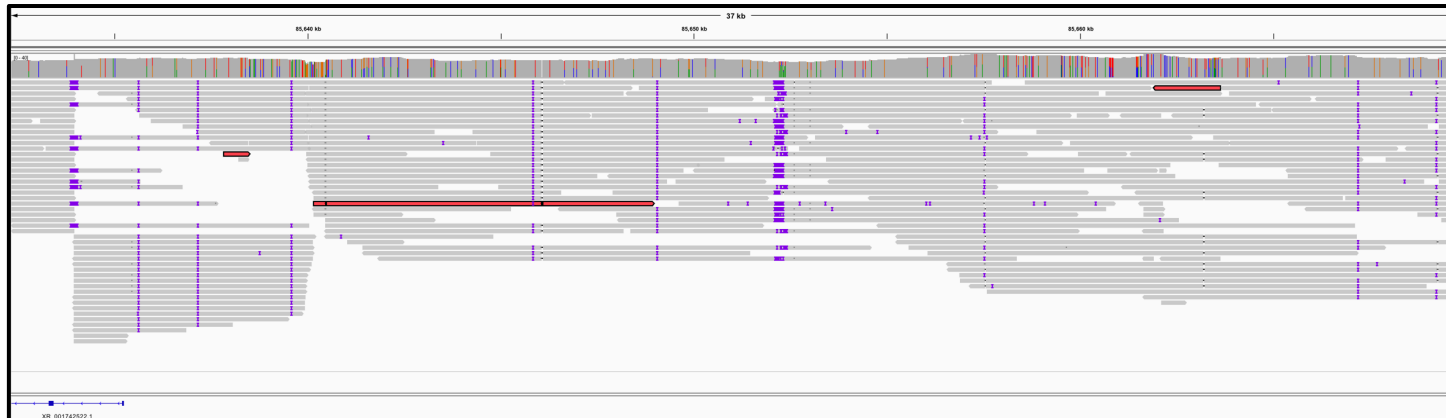

❖ chr6-167220854-167286115

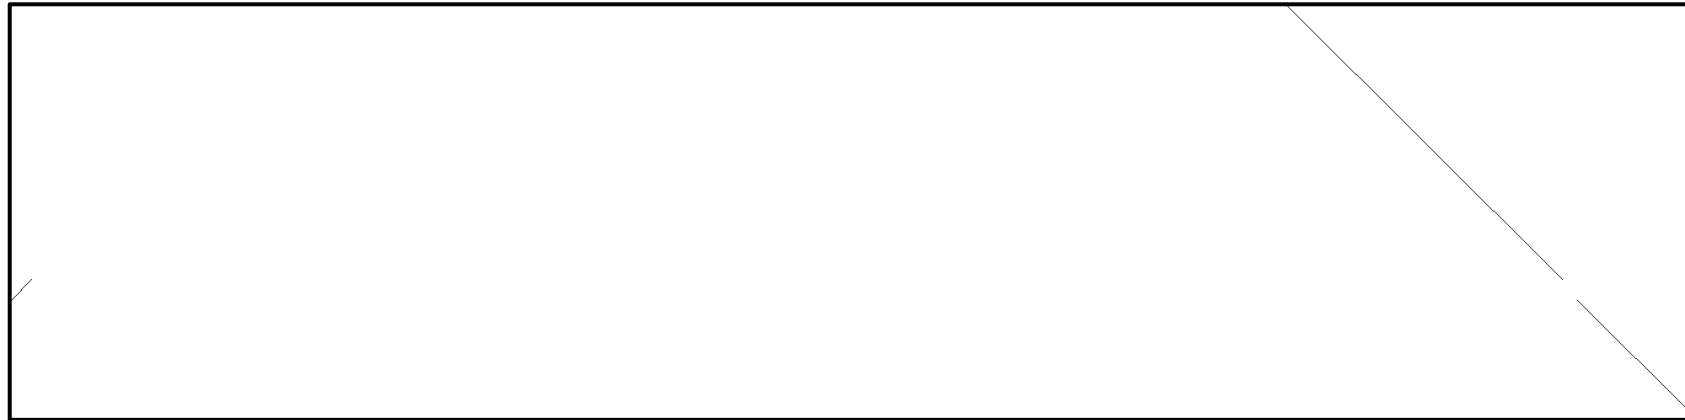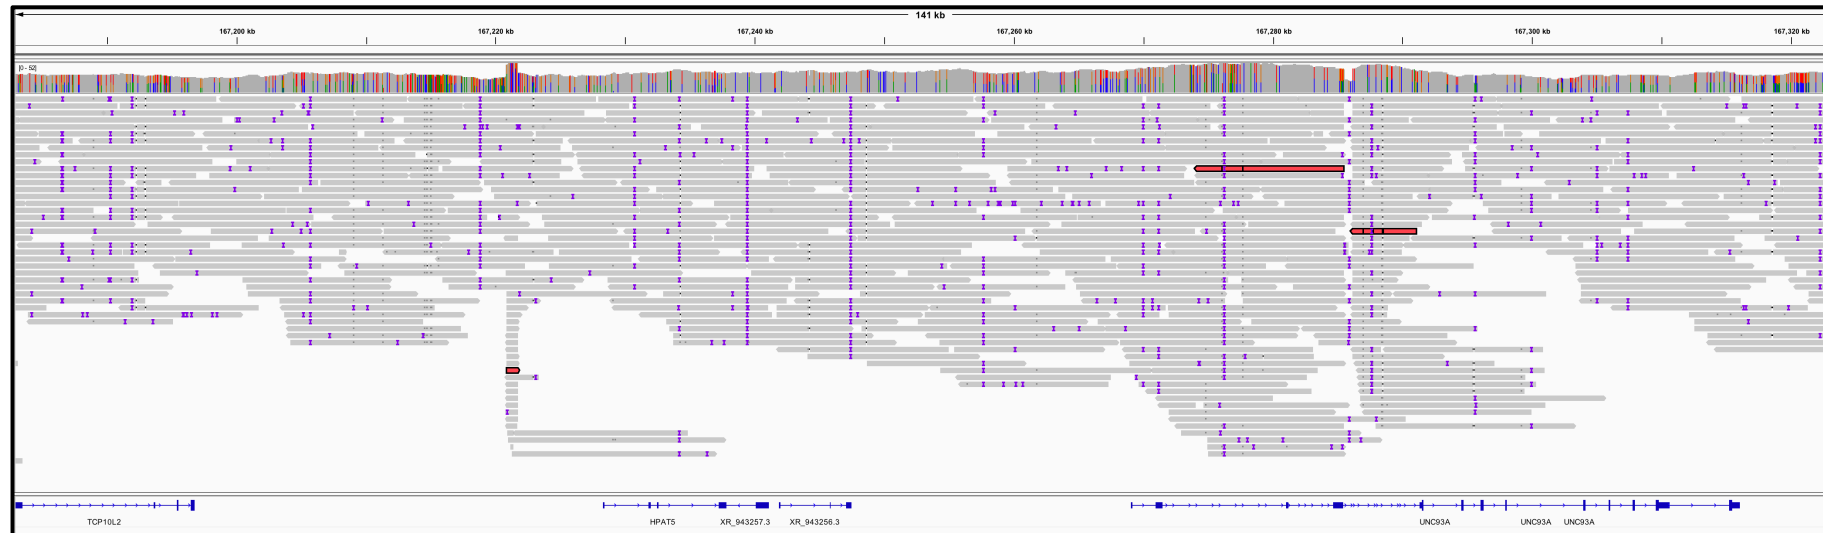

❖ chr7-32684001-32712828

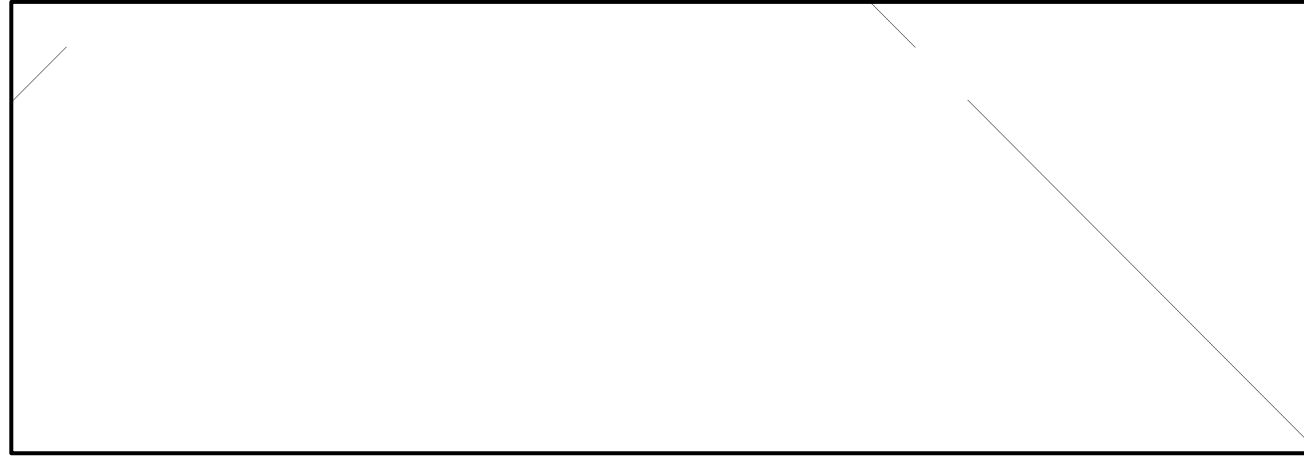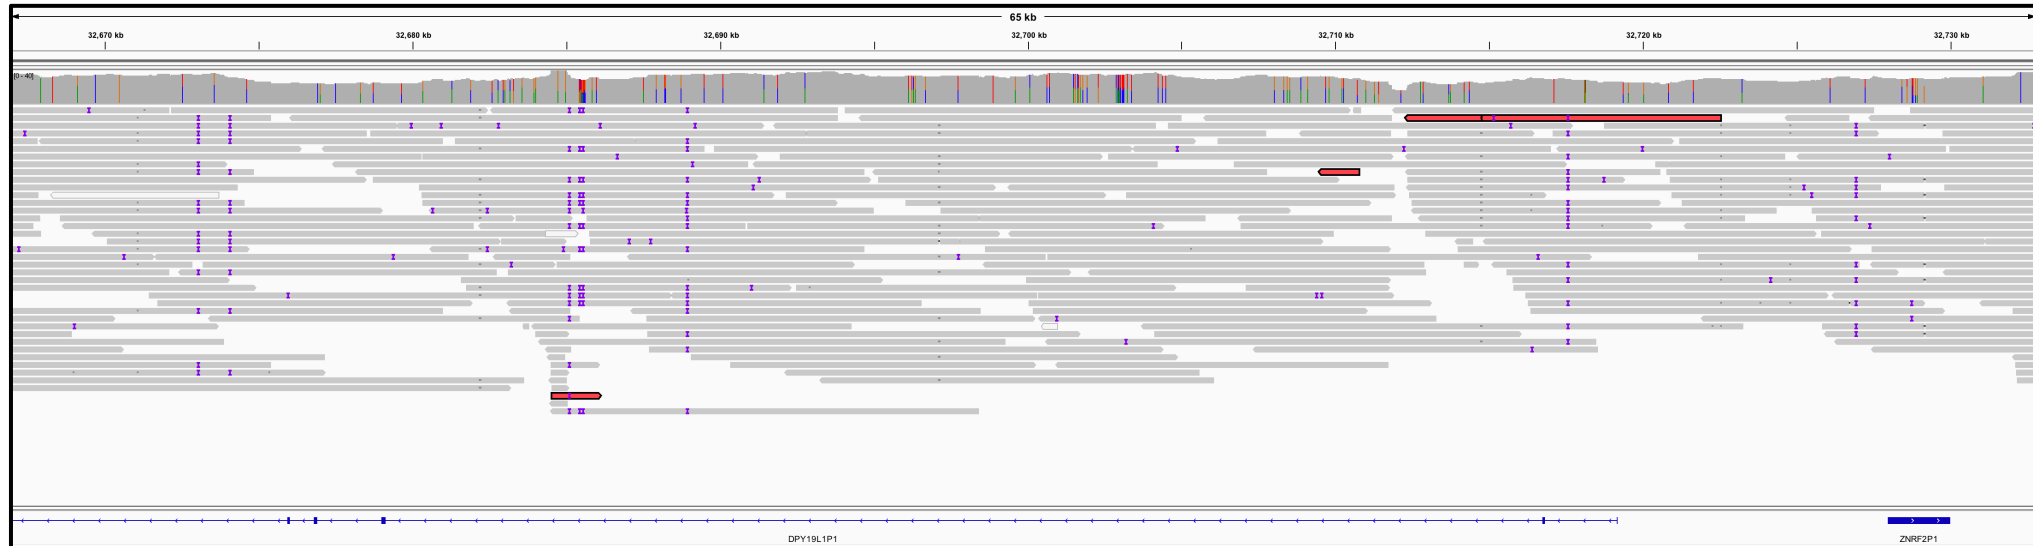



❖ chr12-80452280-80464114

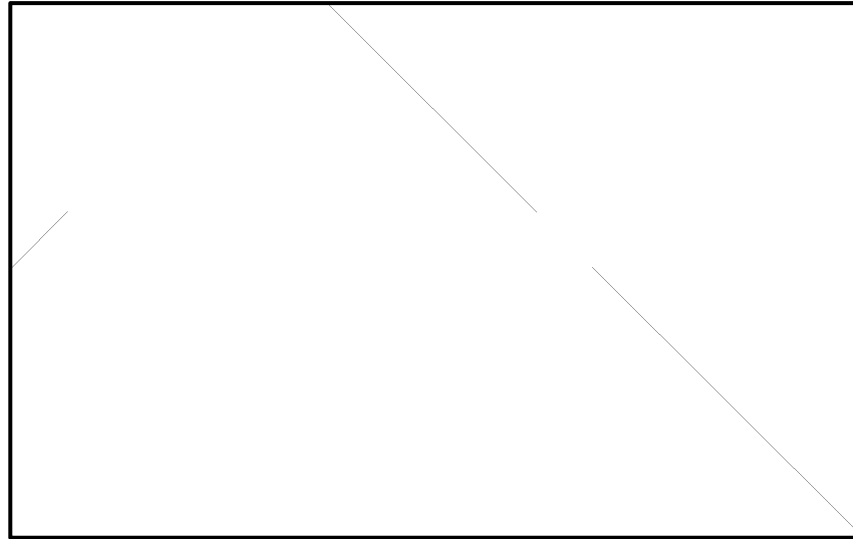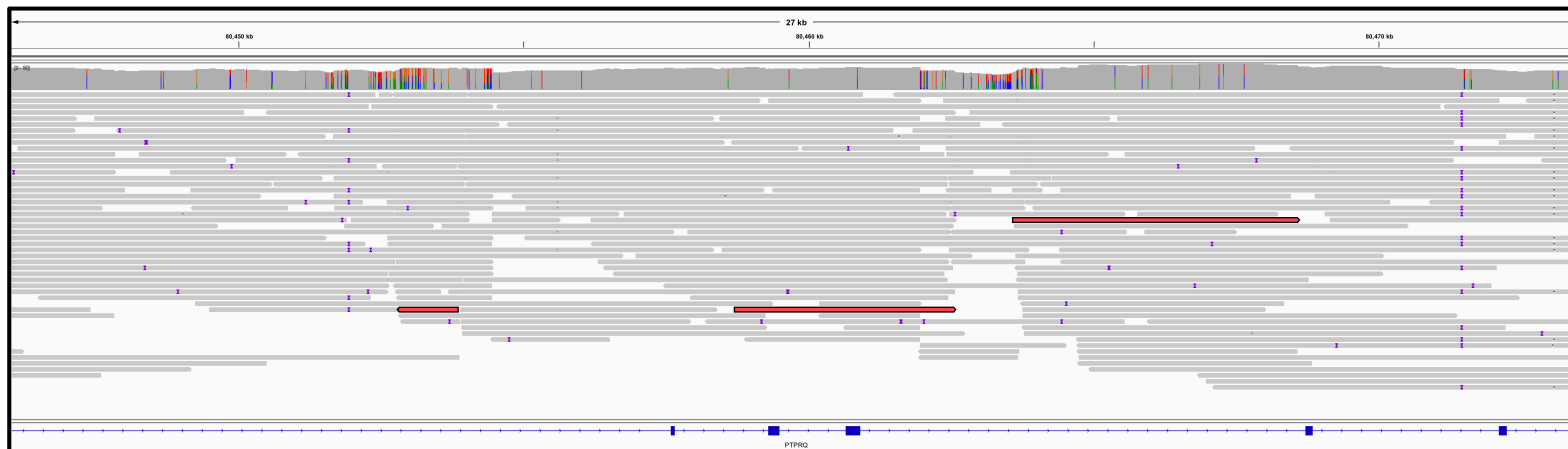

❖ chr13-79819615-79843210

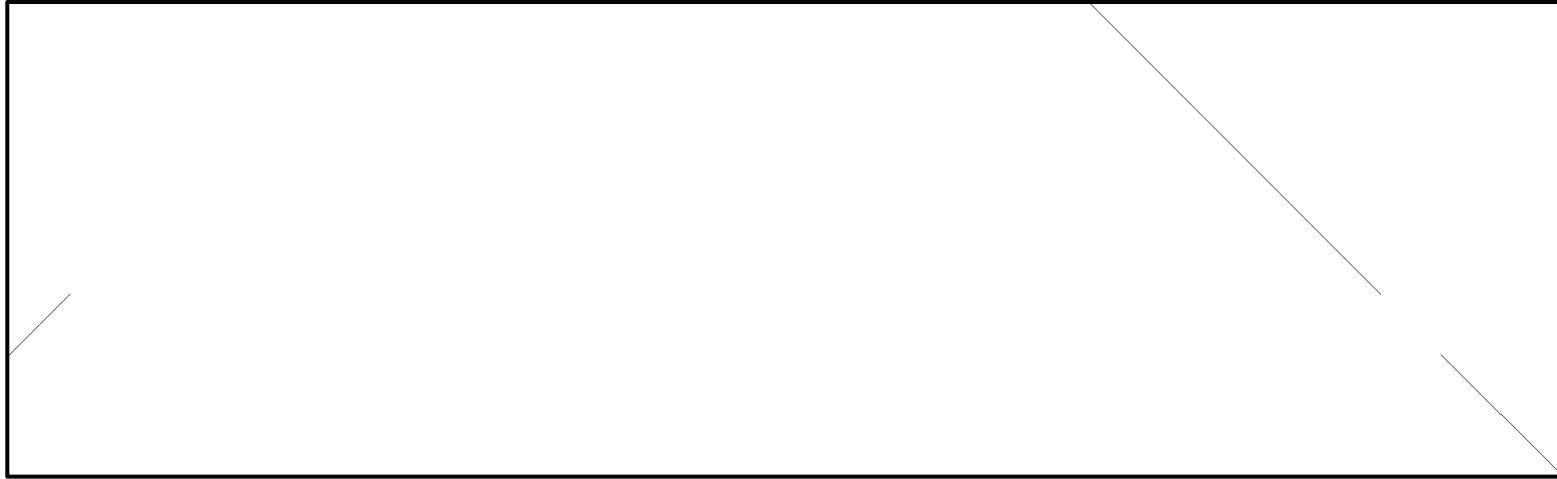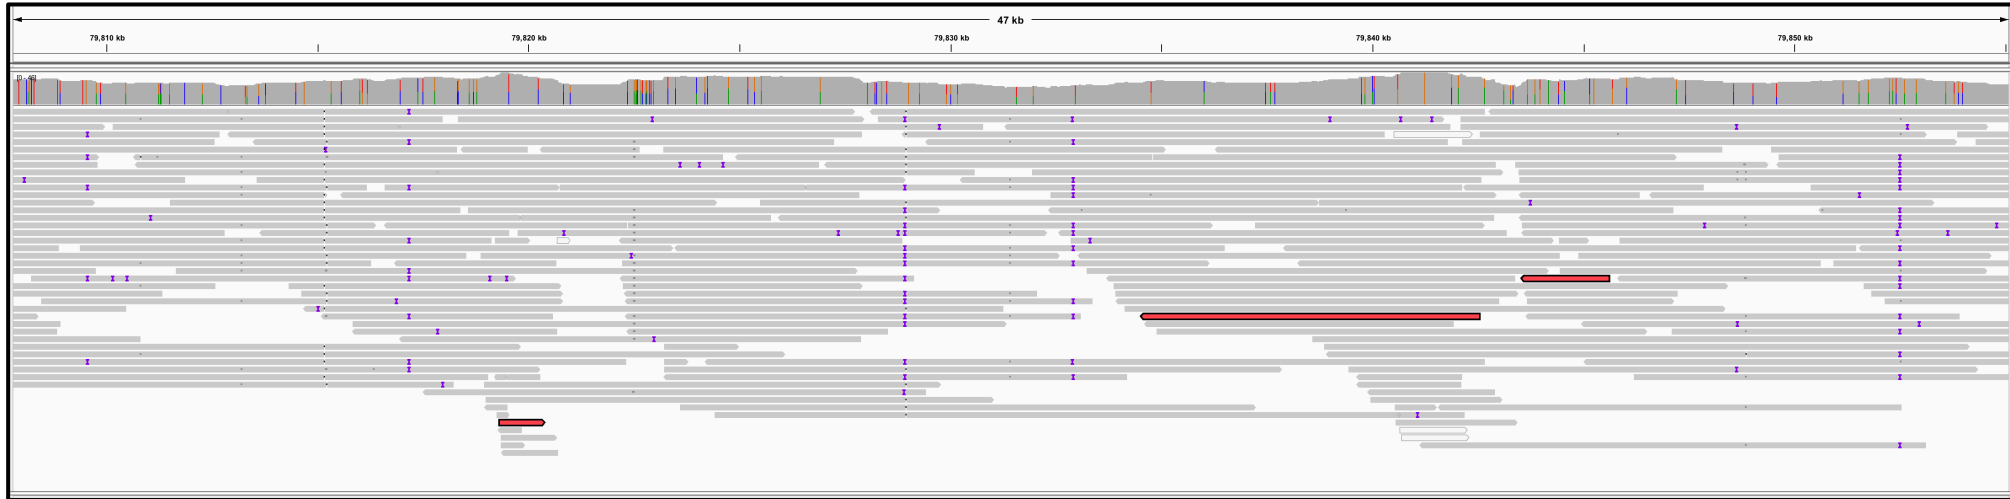

Supplementary File 2

❖ **chr15-95148445-95149529**

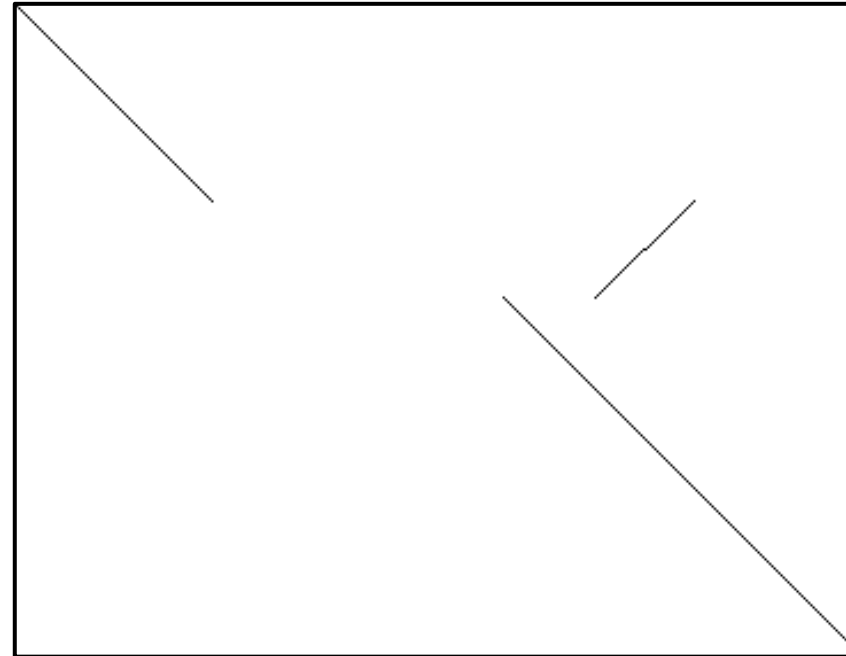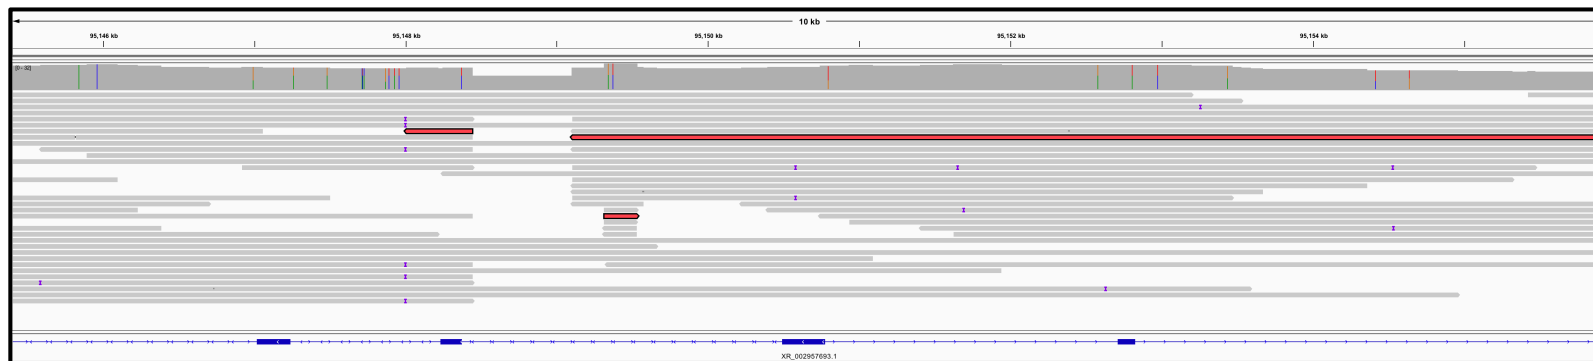

Supplementary File 2

❖ chr20-44677206-44683572

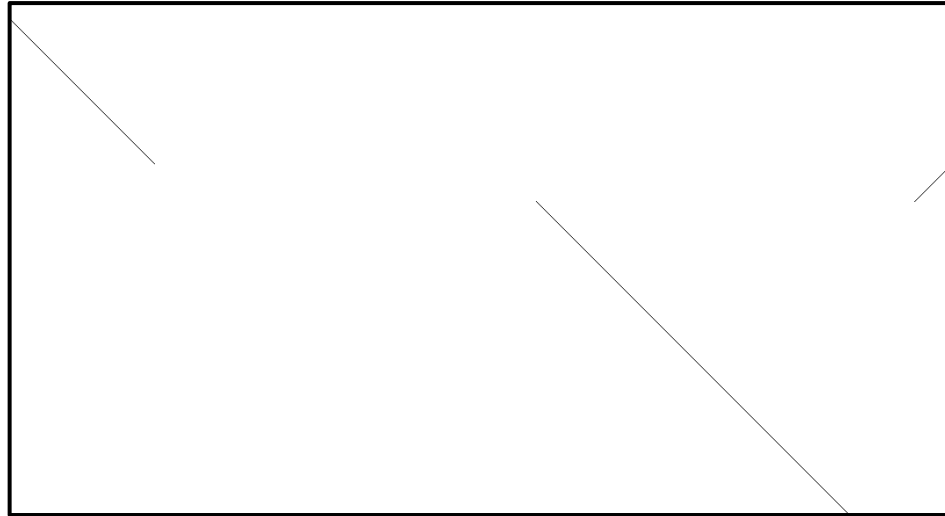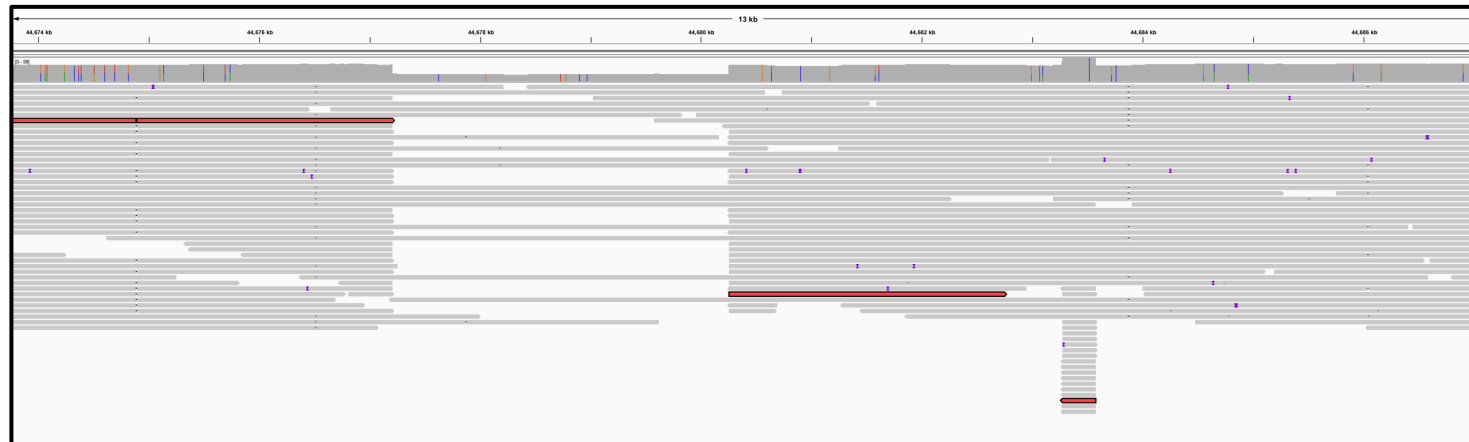

# GraphID-28, deletion and dispersed duplication

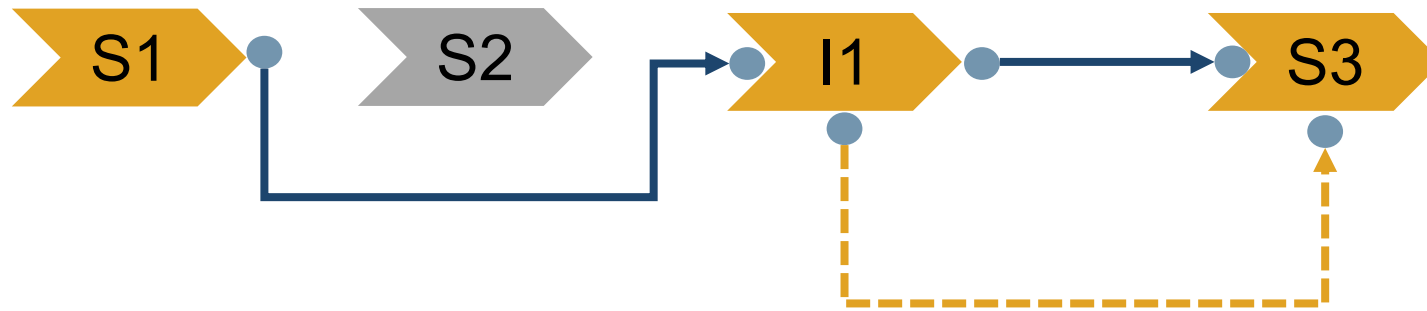

Nodes=S:3,I:1,D:1

❖ chr3-95746924-95752141

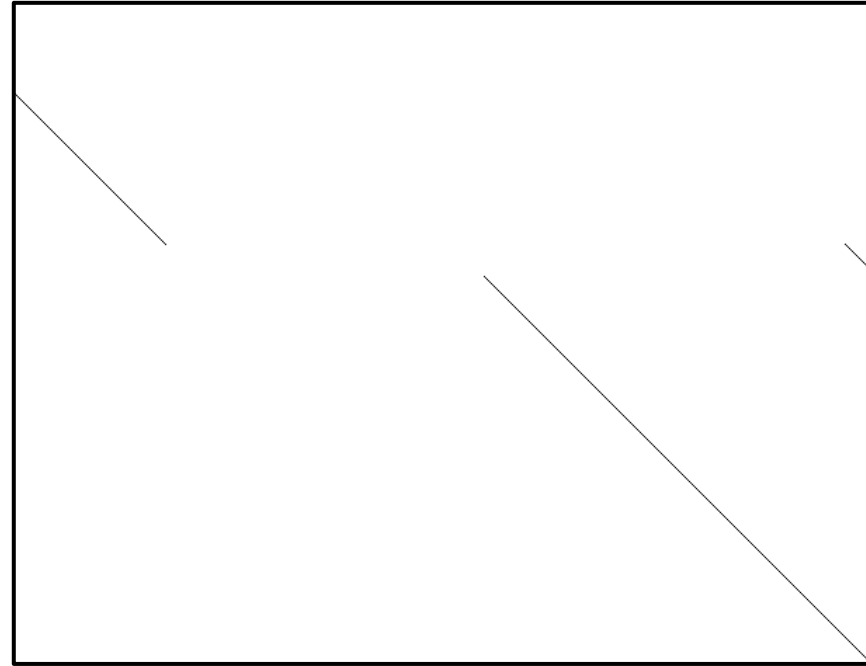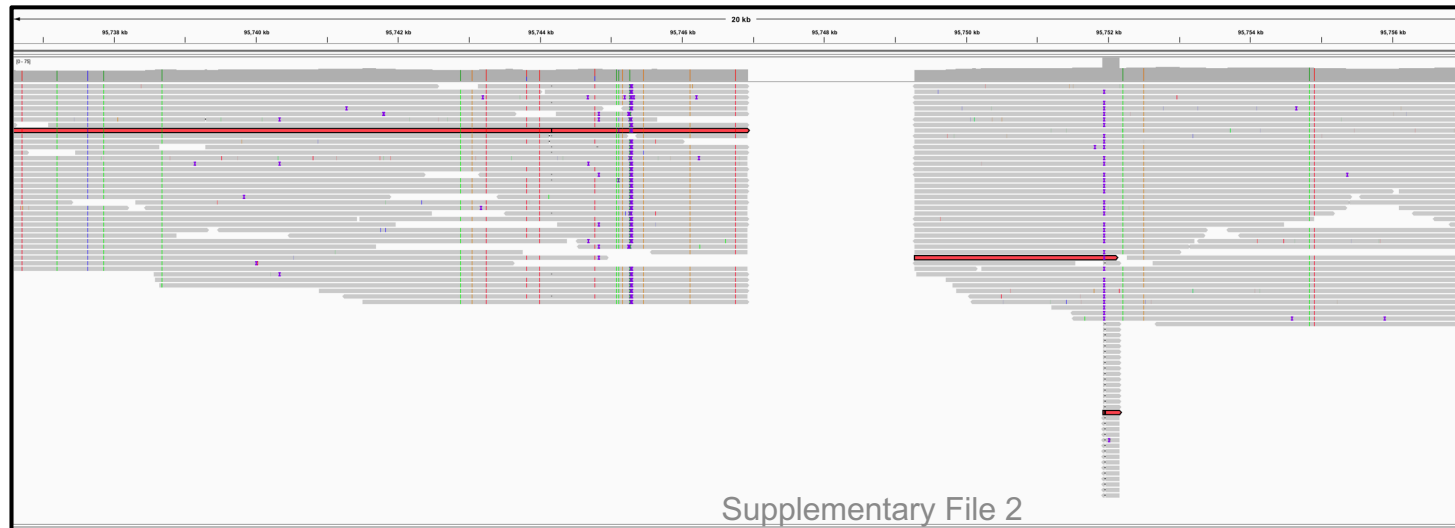

❖ chr3-146667402-146677317

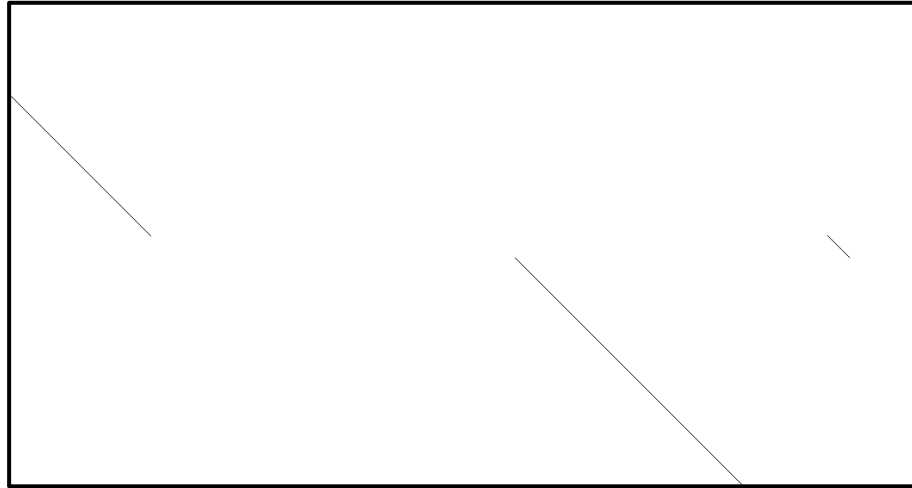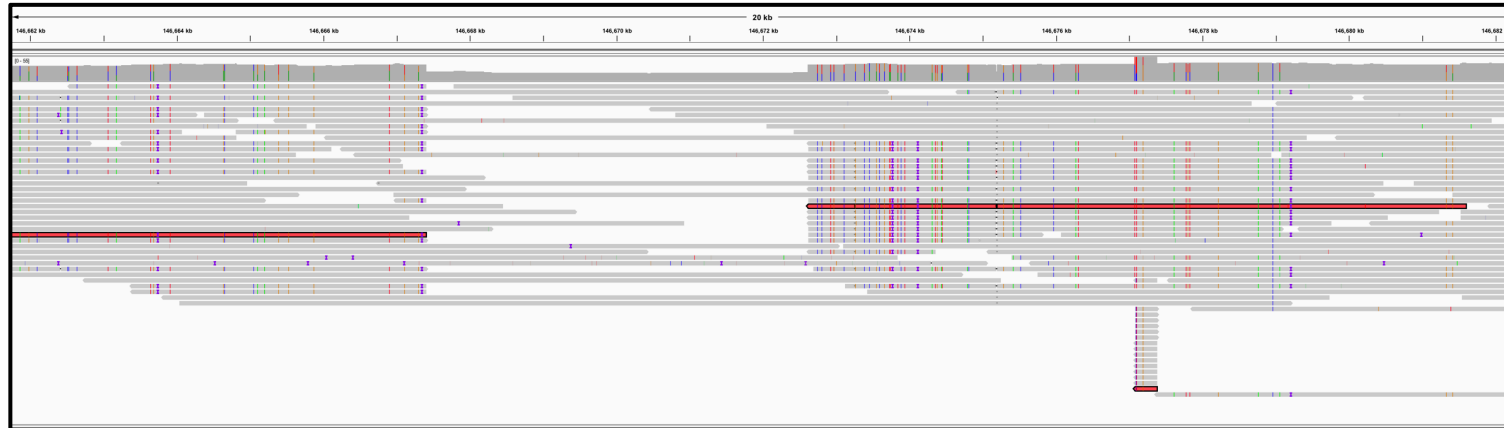

❖ **chr9-110262294-110274913**

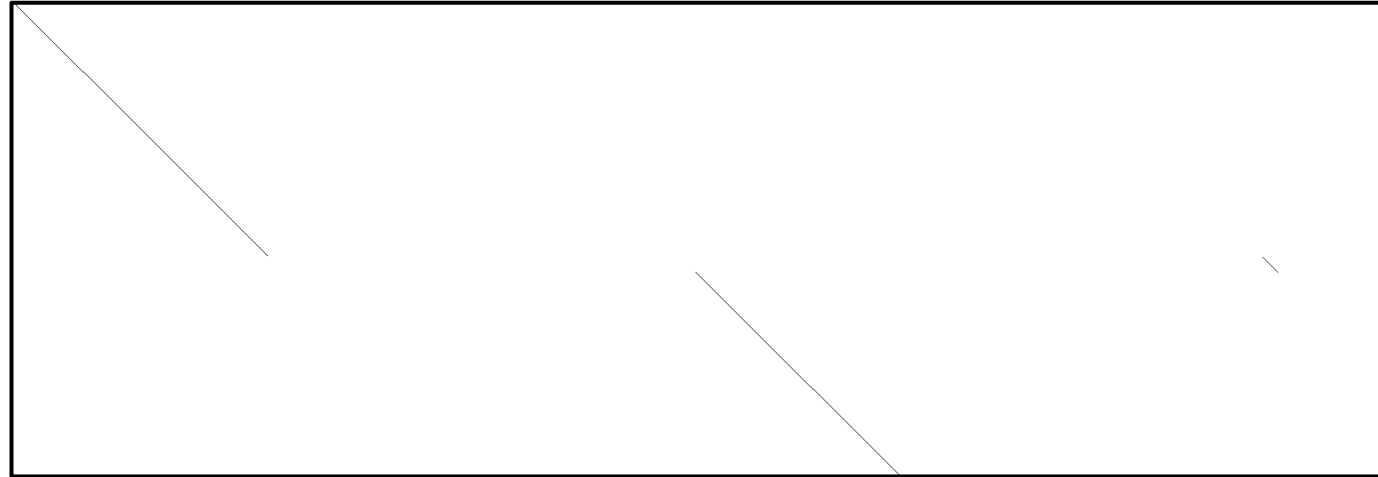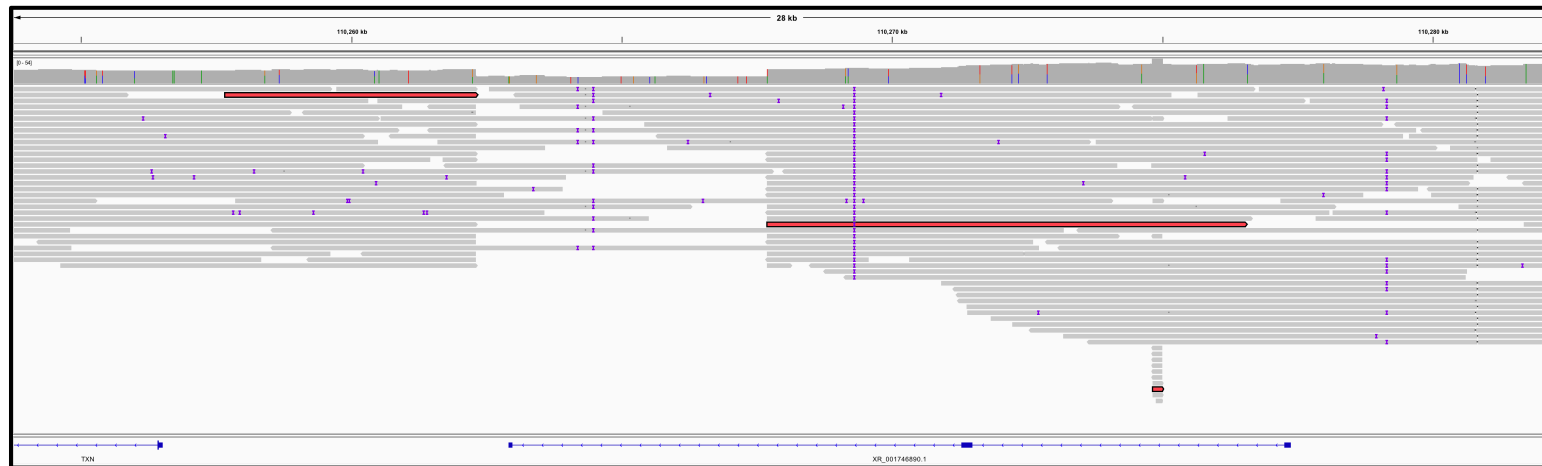

Supplementary File 2



❖ chr15-91438350-91446225

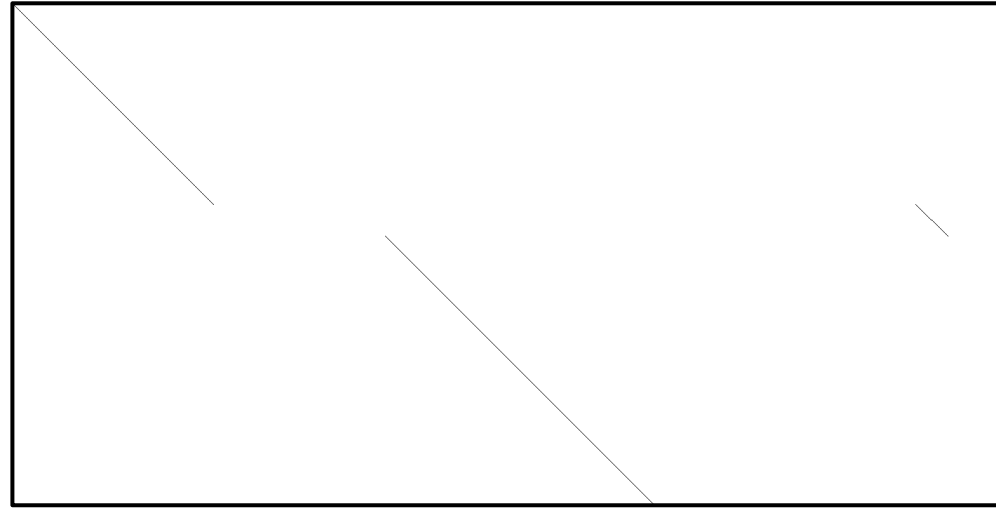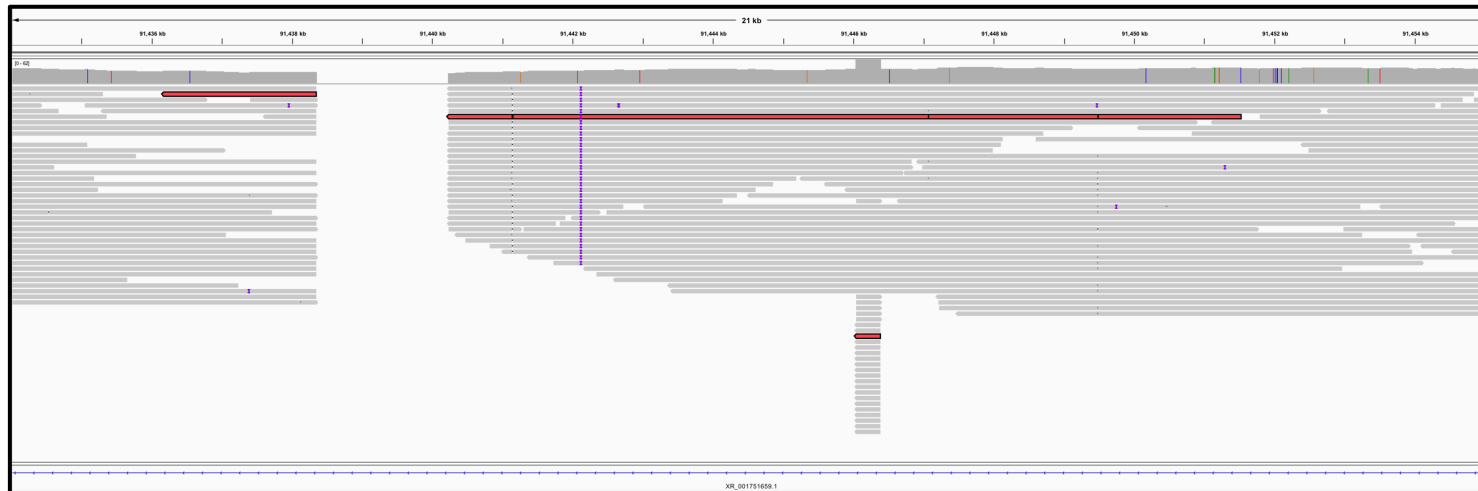

Supplementary File 2

❖ chr22-18136755-18146780

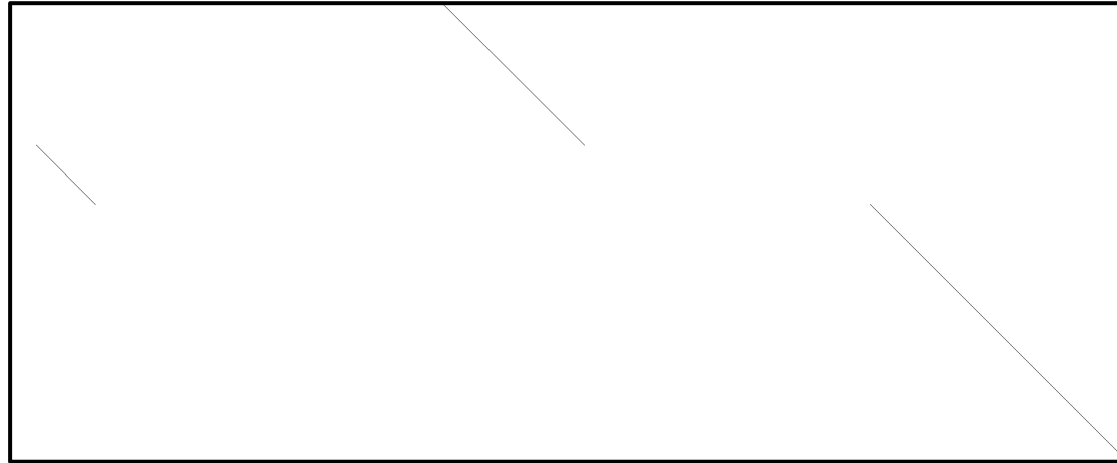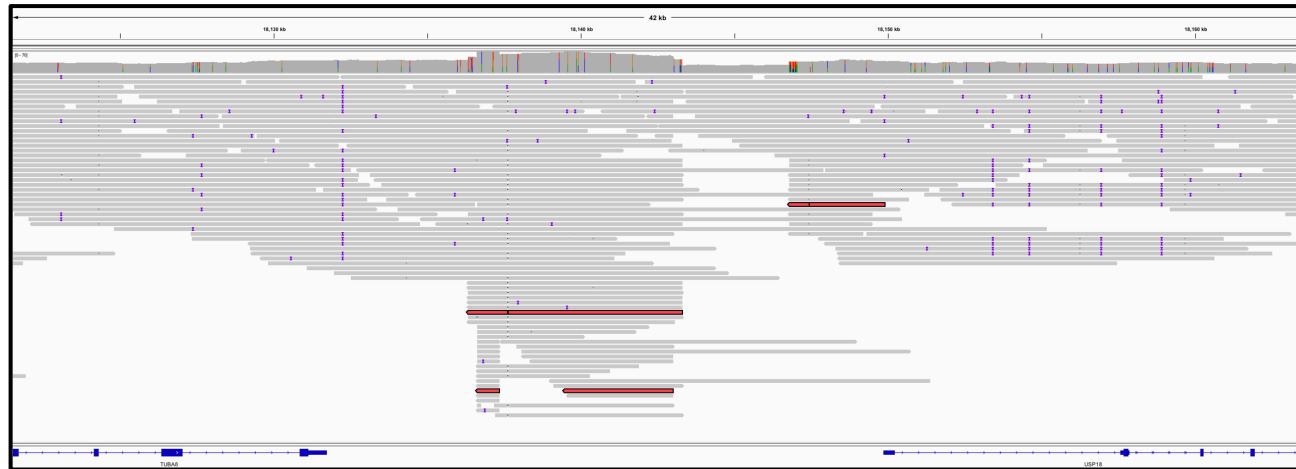

Supplementary File 2

# GraphID-2

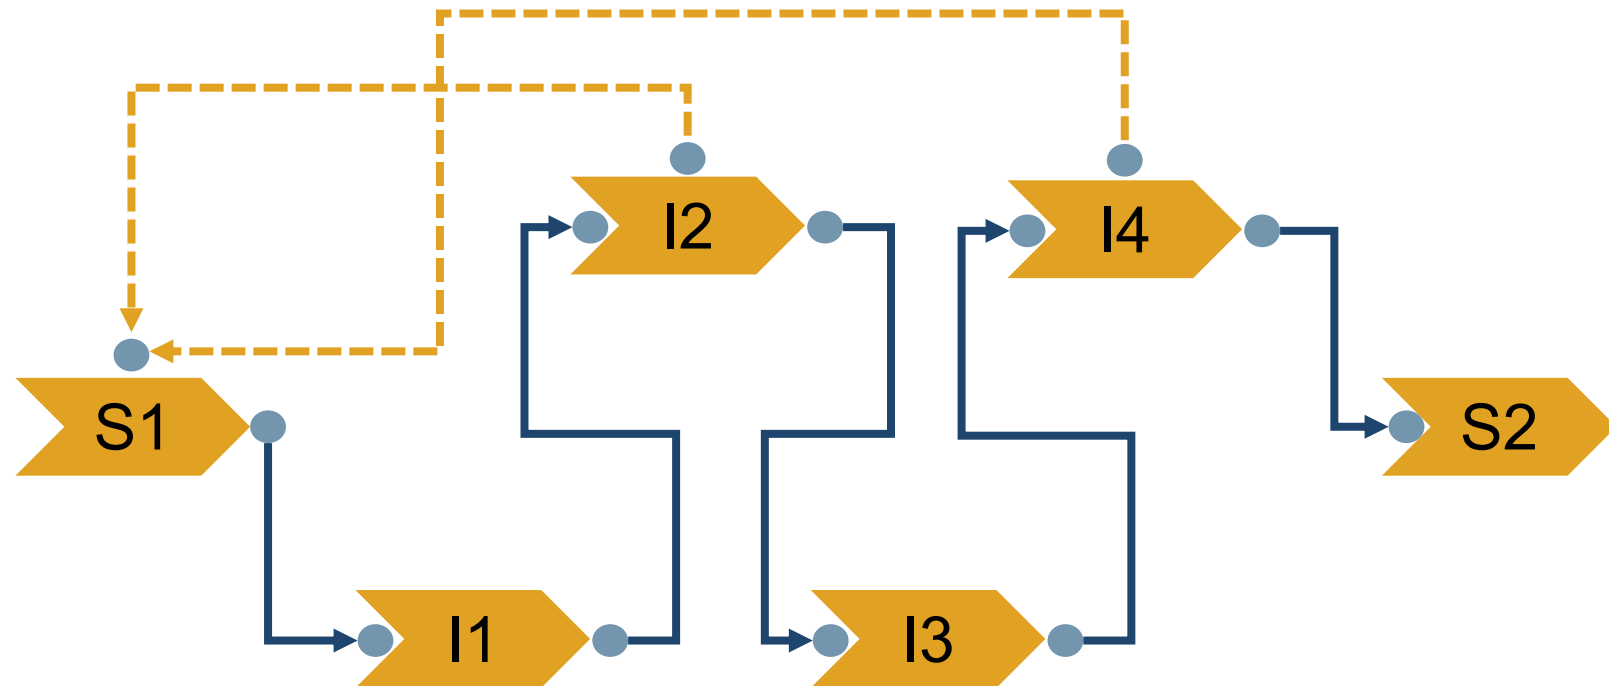

Nodes=S:2,I:4,D:2

❖ chr12-132954337-132954479

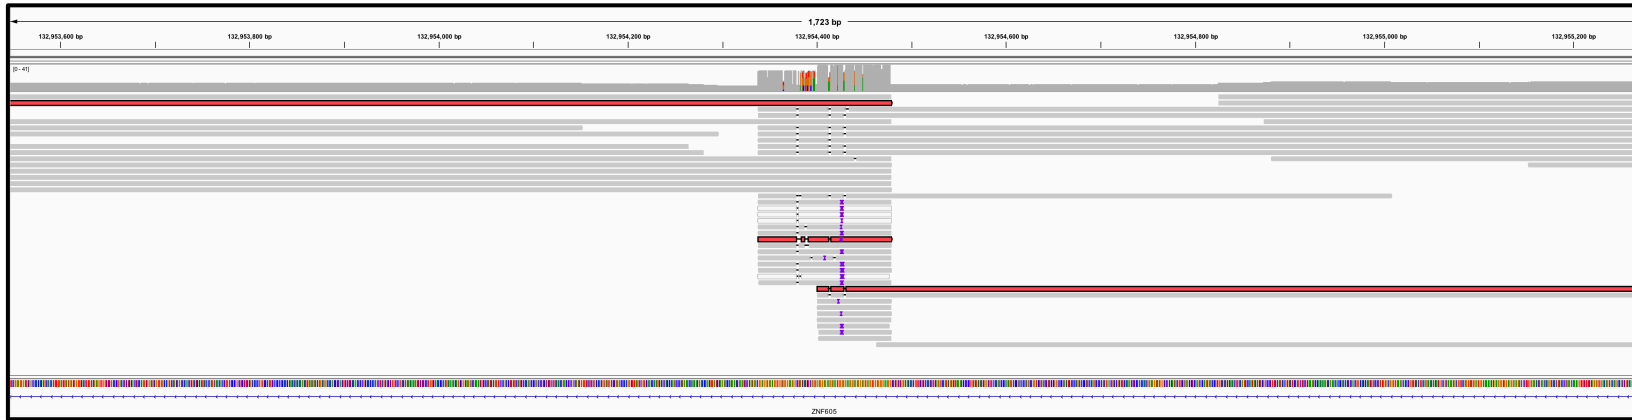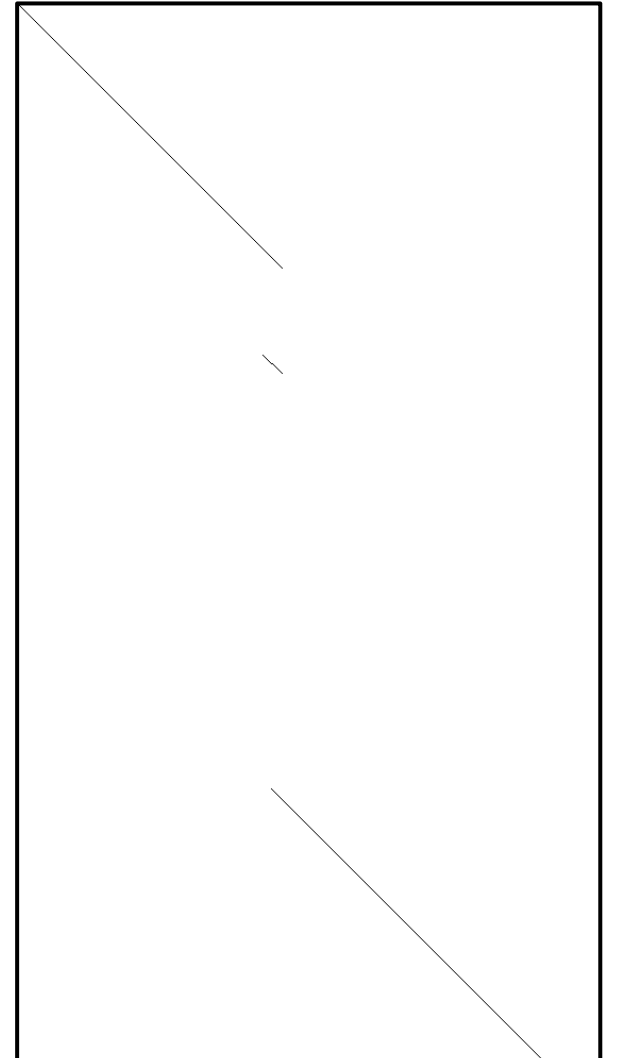

❖ **chr13-113176446-113176543**

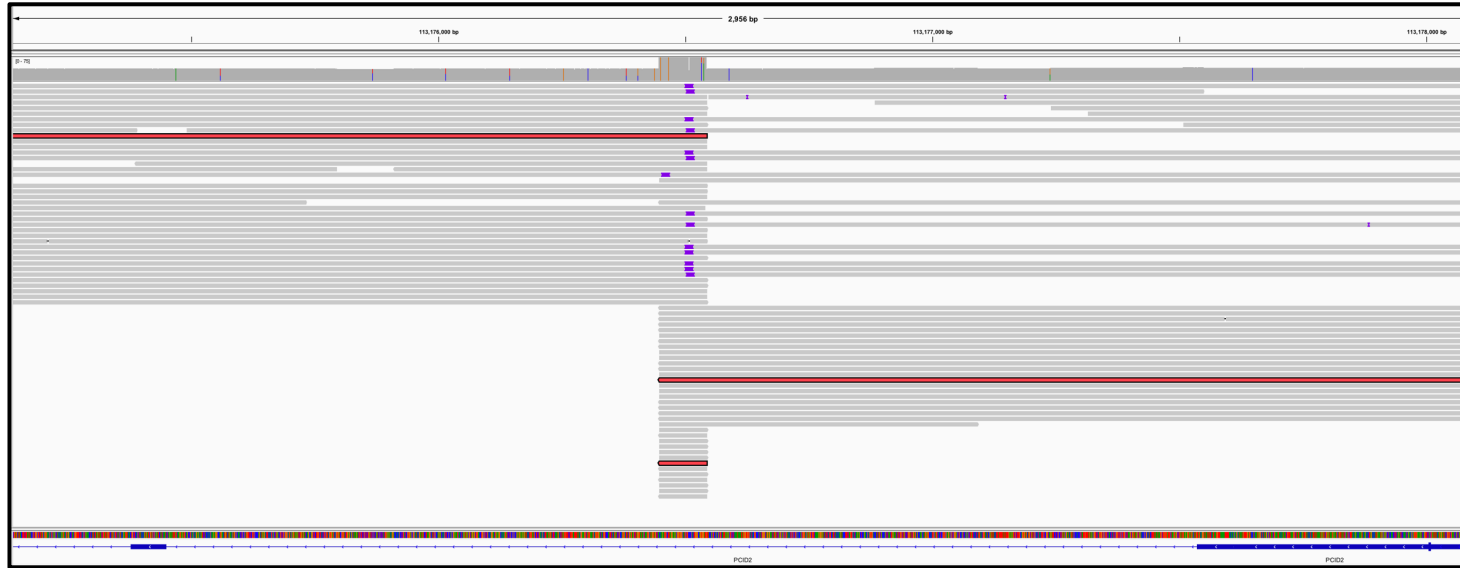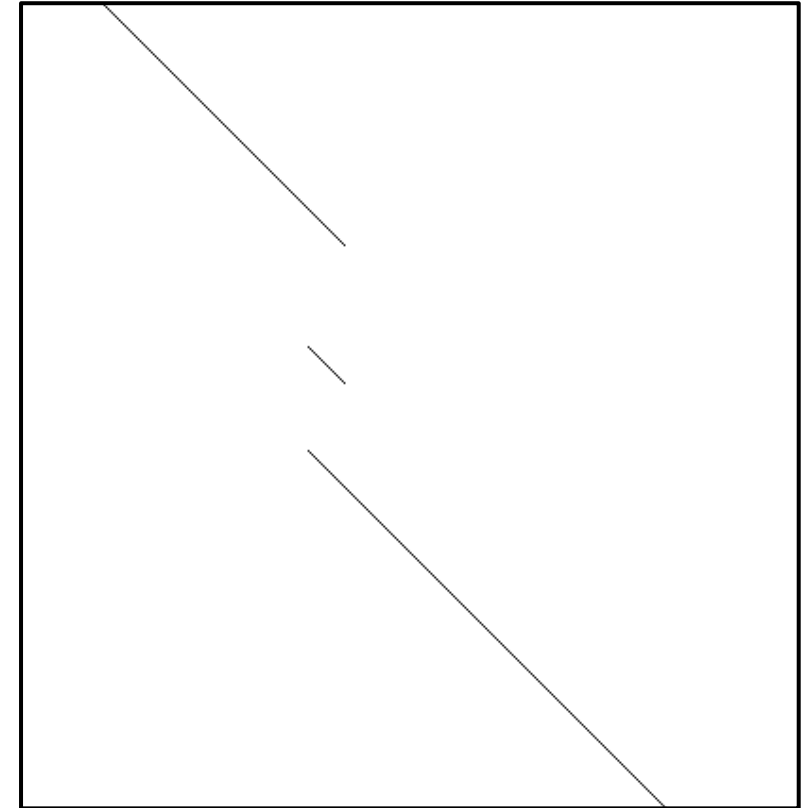

❖ **chr19-16256389-16256892**

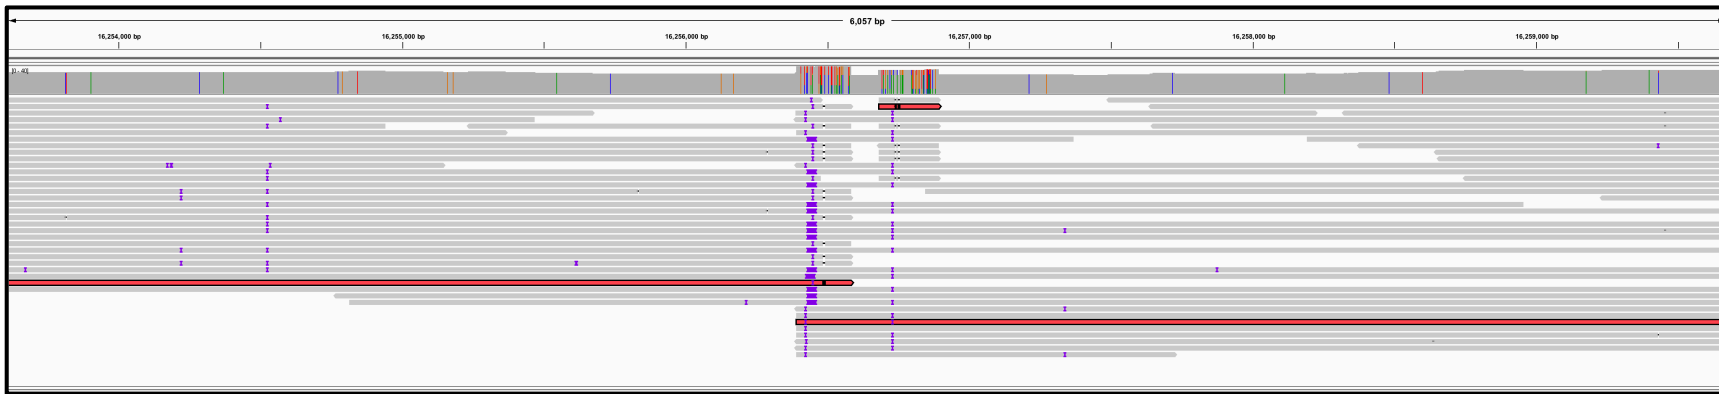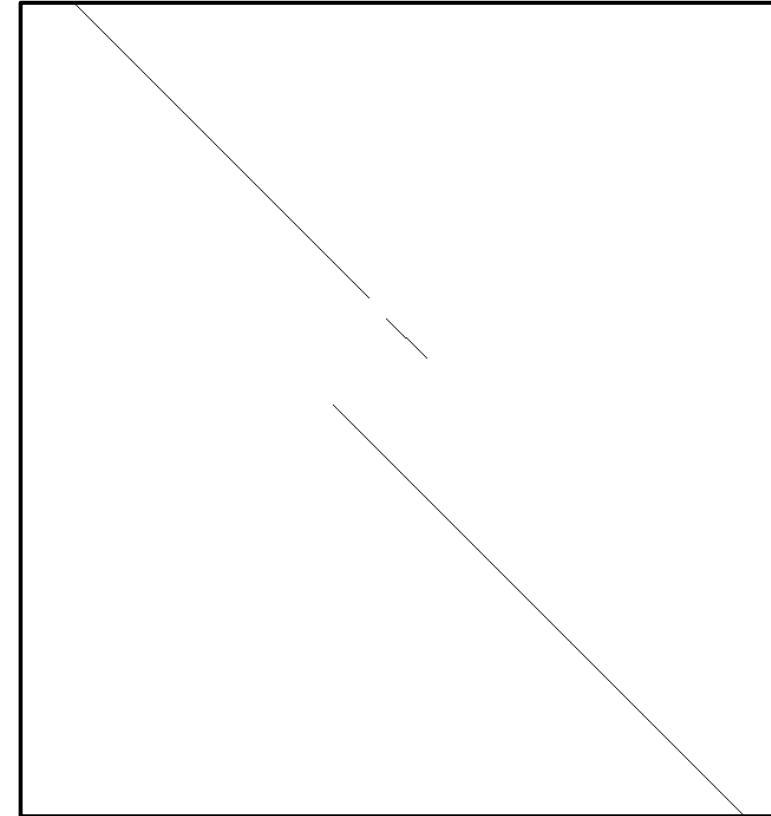

❖ **chr20-61329281-61329476-16518-10**

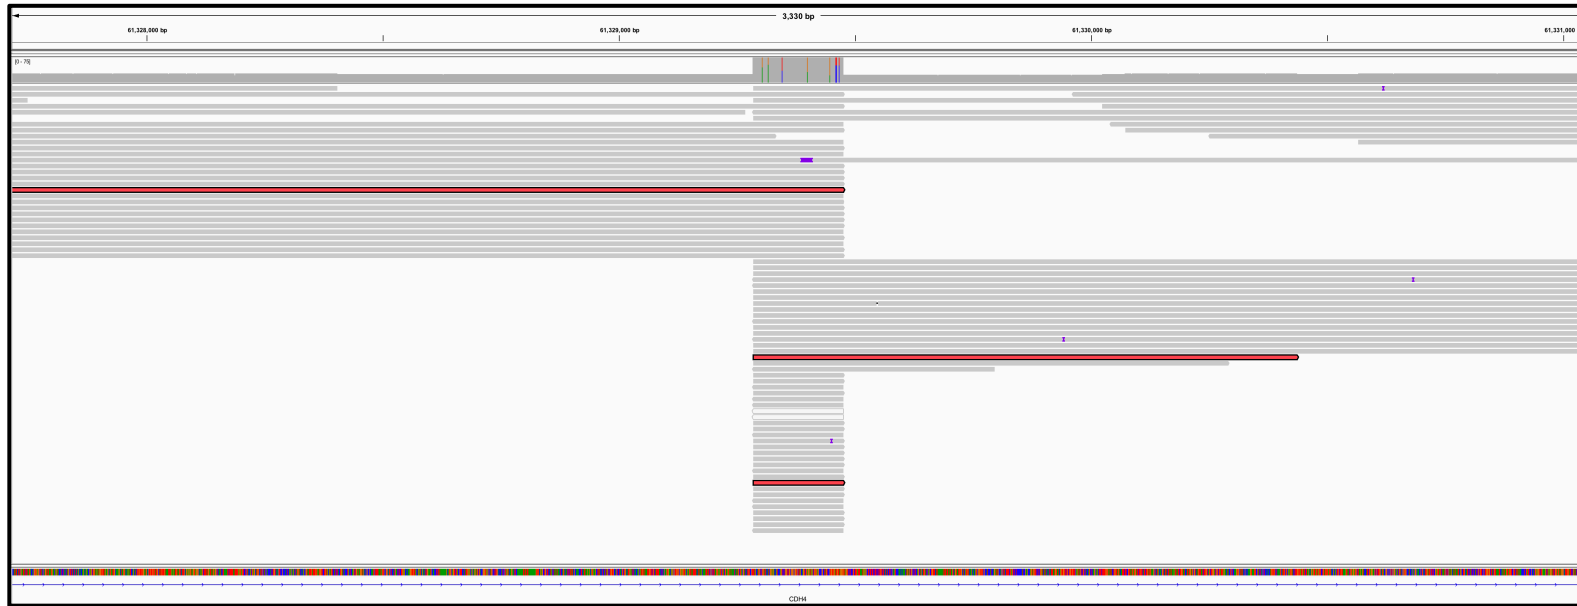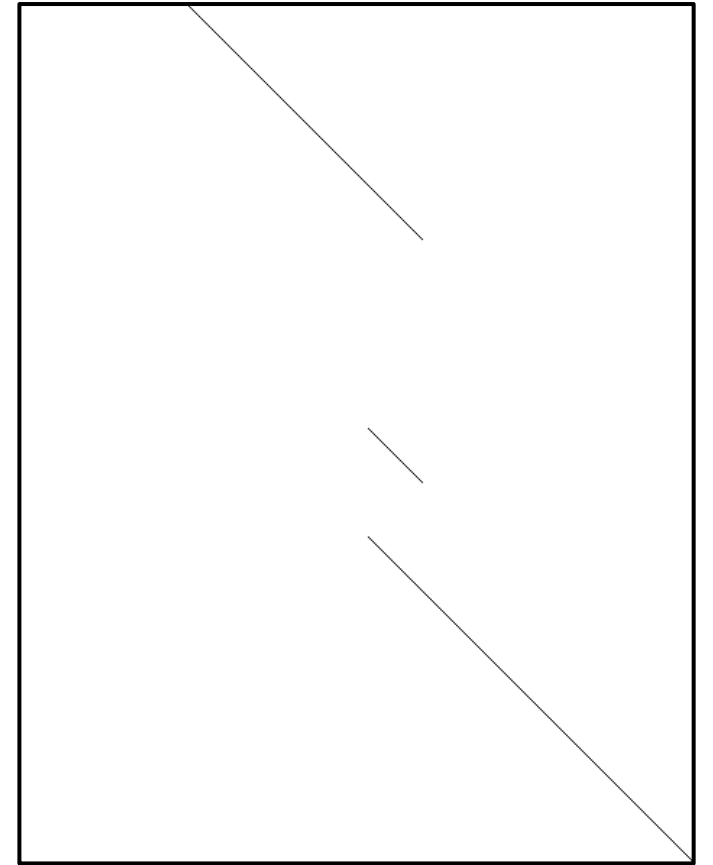

# GraphID-4

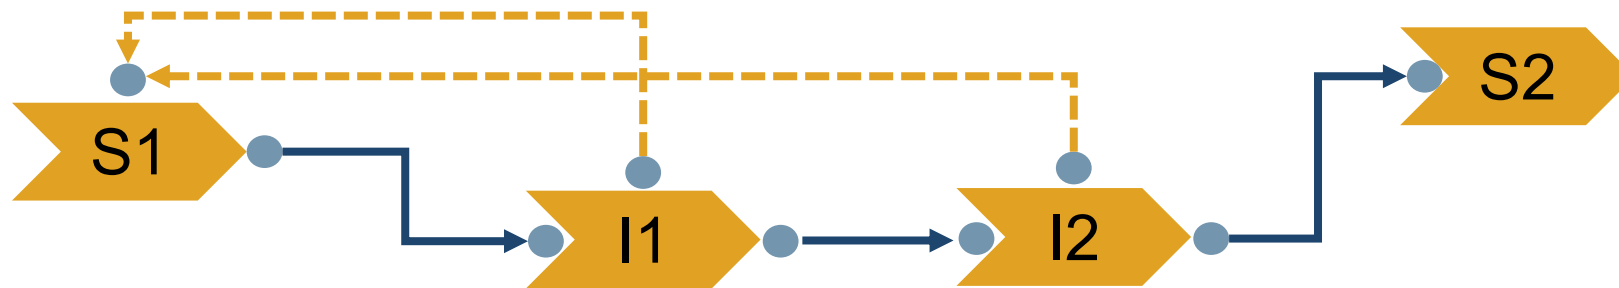

Nodes=S:2,I:2,D:2

Supplementary File 2



❖ chr1-70446312-70446751

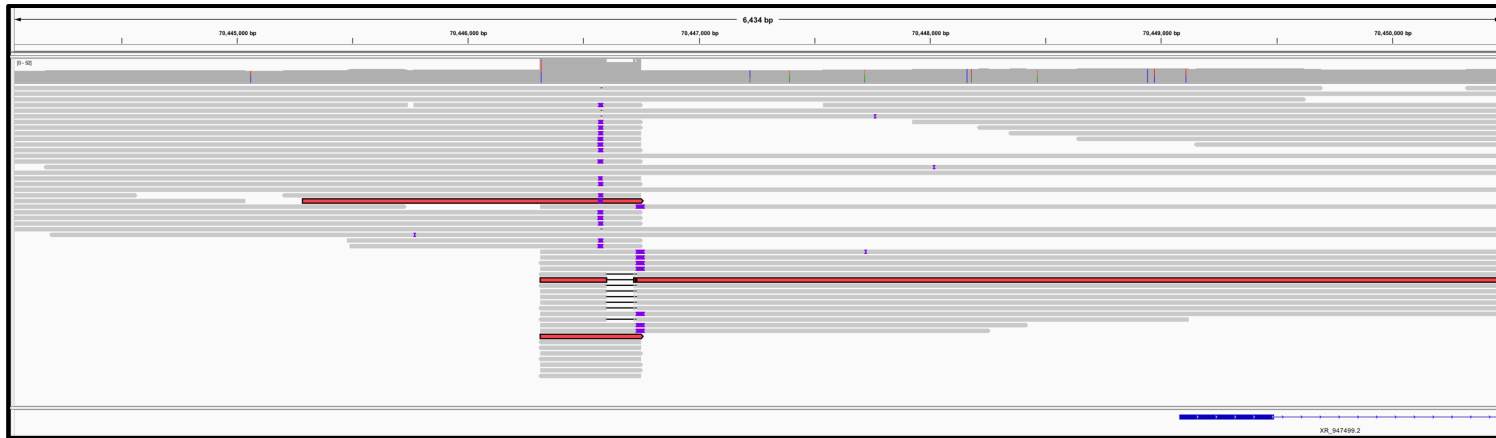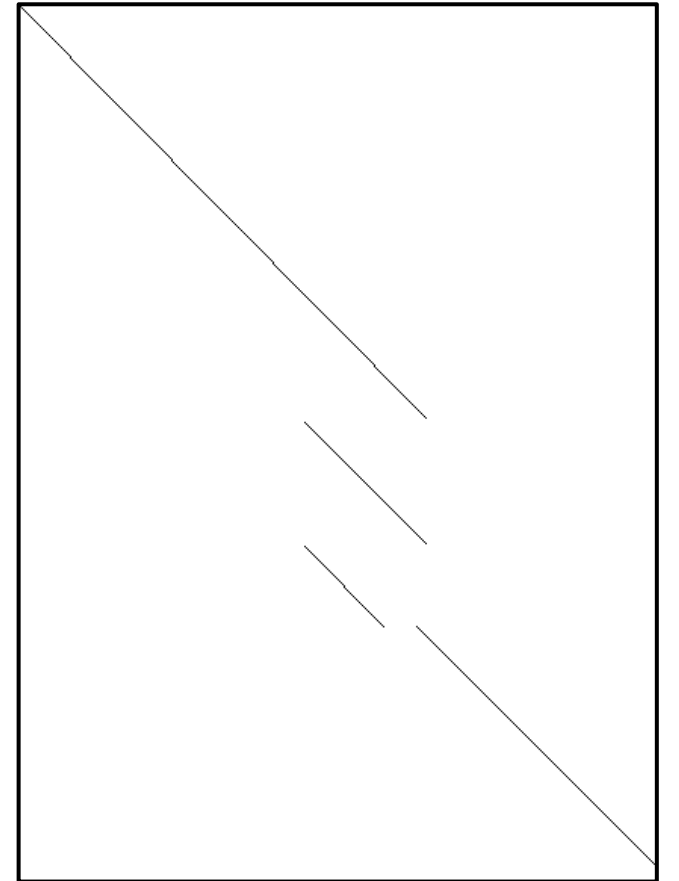

❖ chr11-94233146-94238782

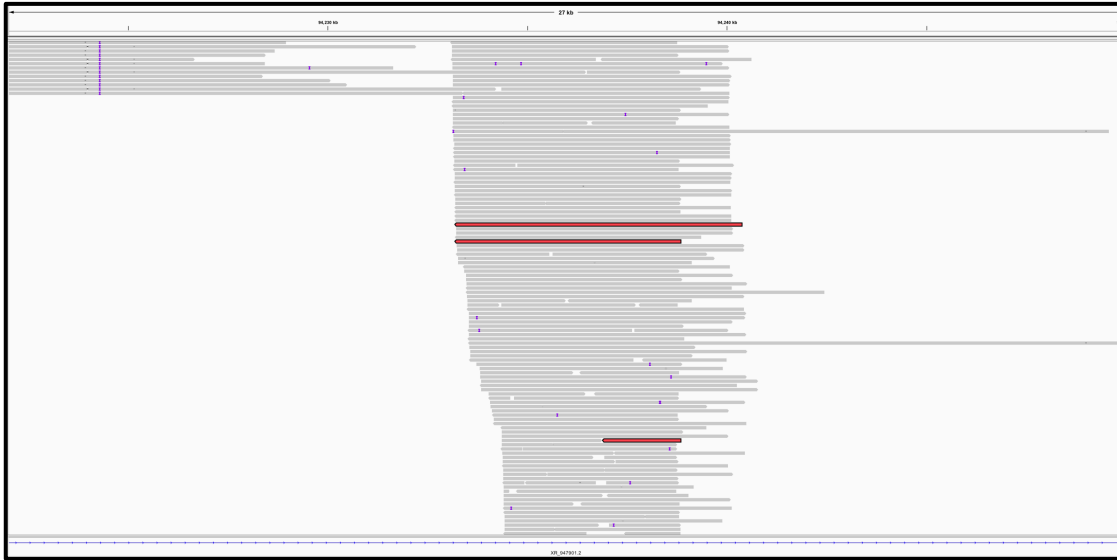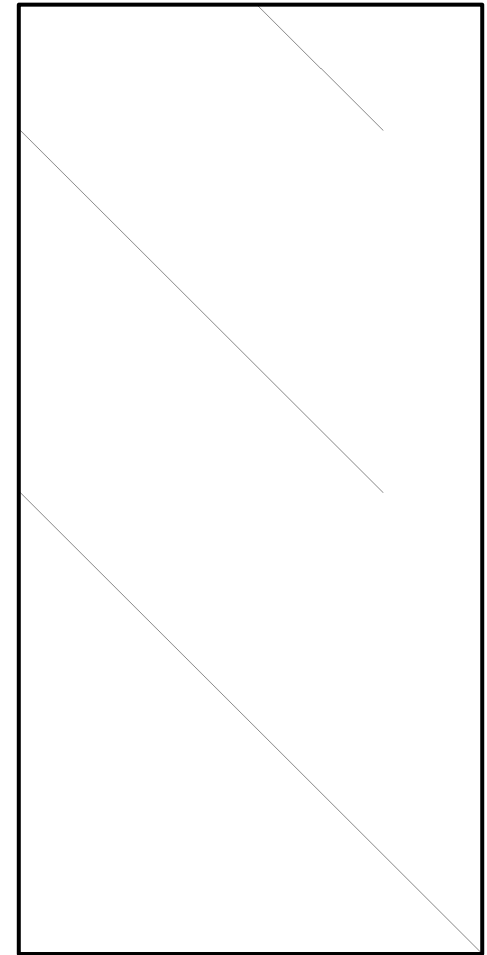



# chr16-3632630-3634495

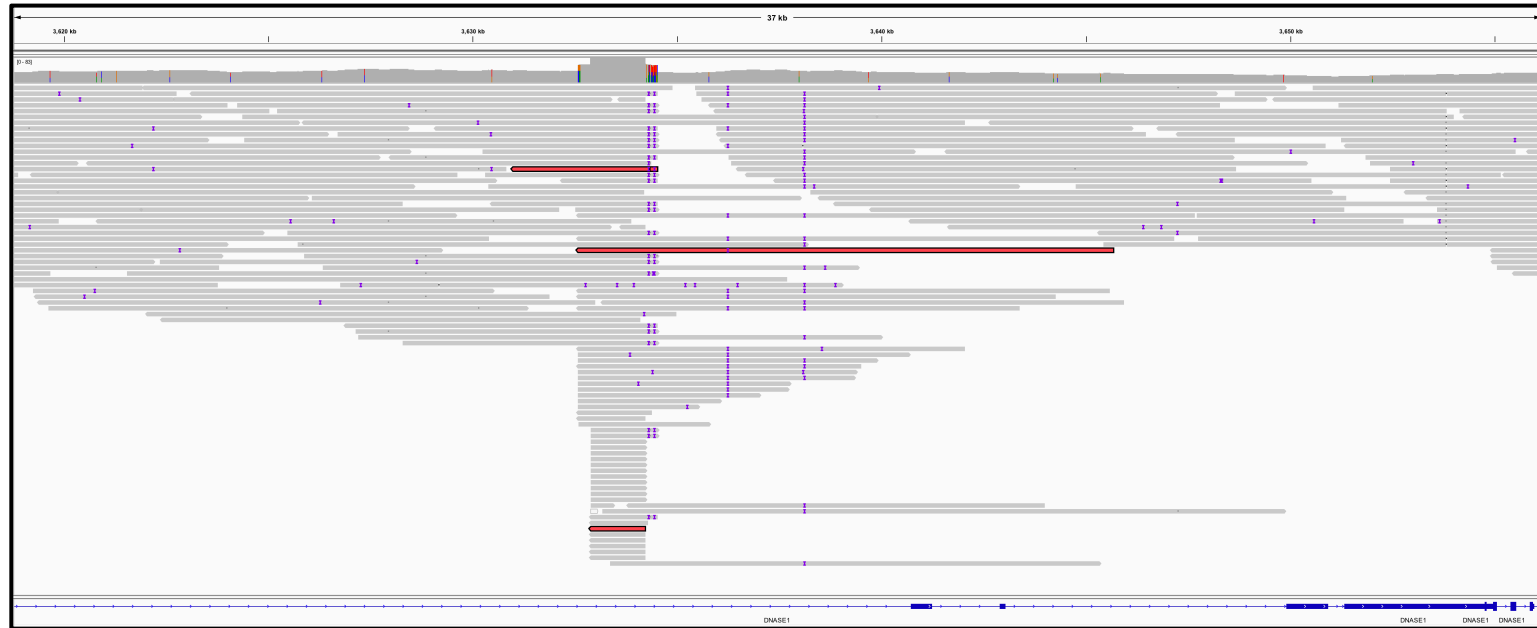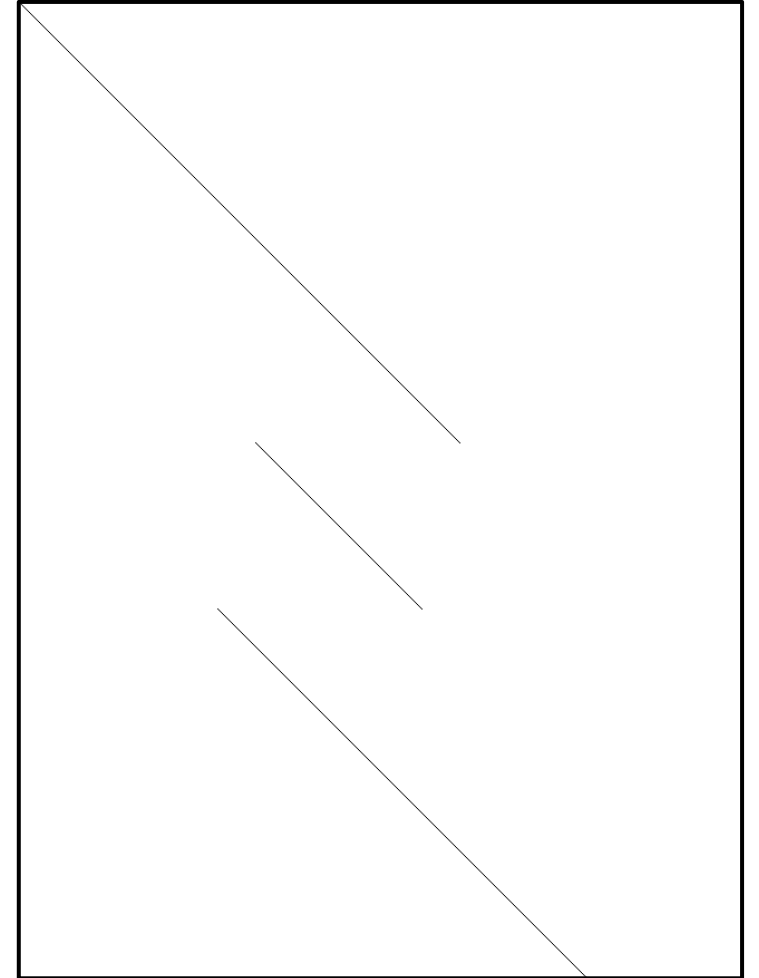

❖ chr16-81764812-81765622

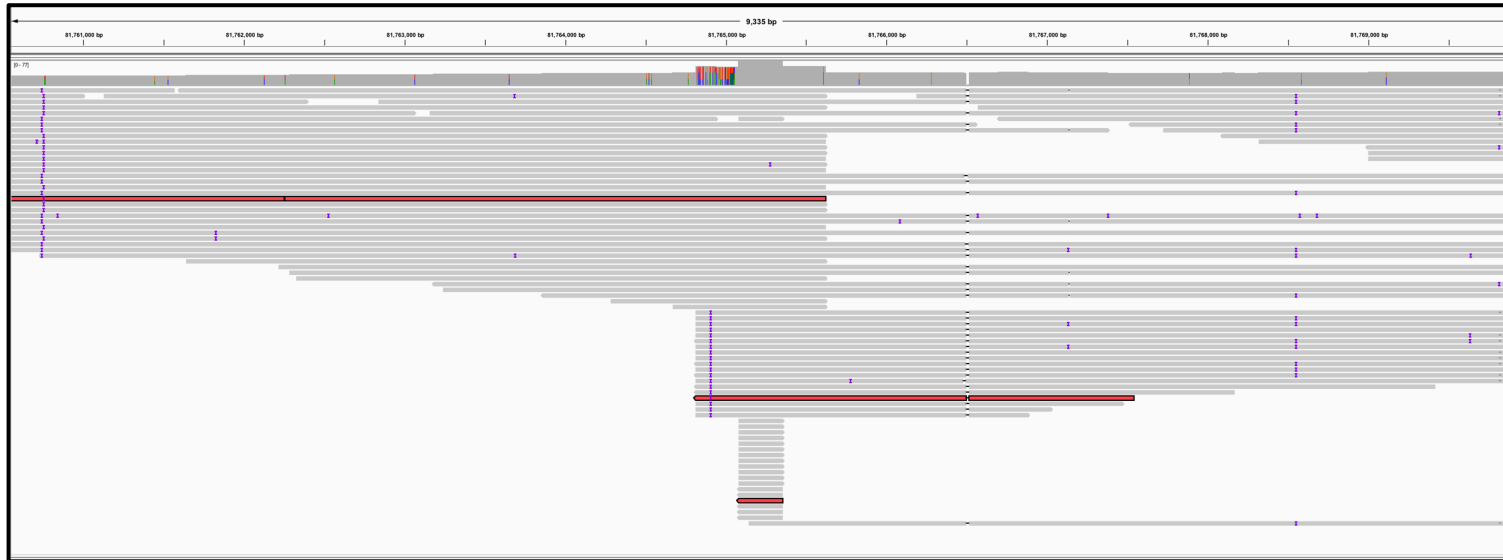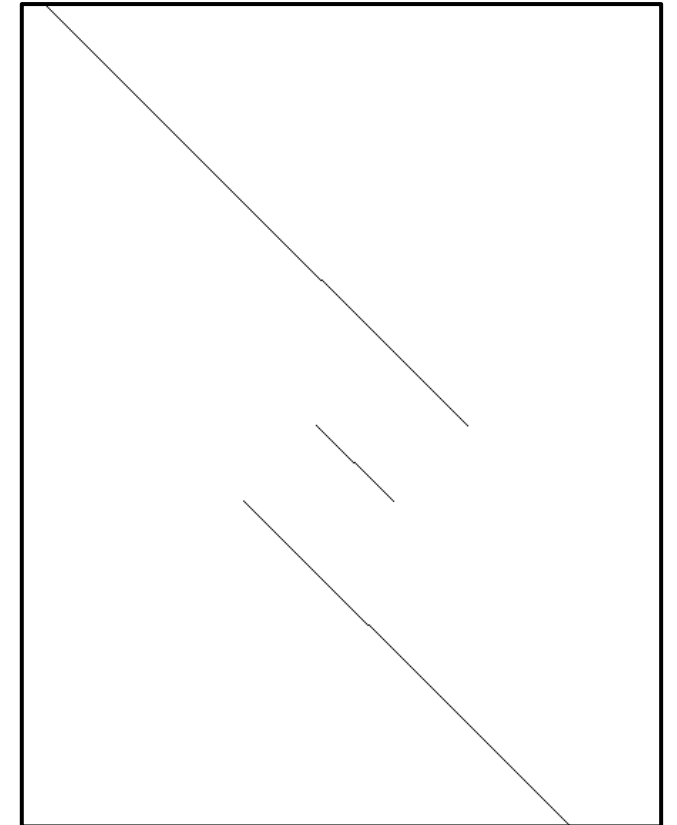

# GraphID-6

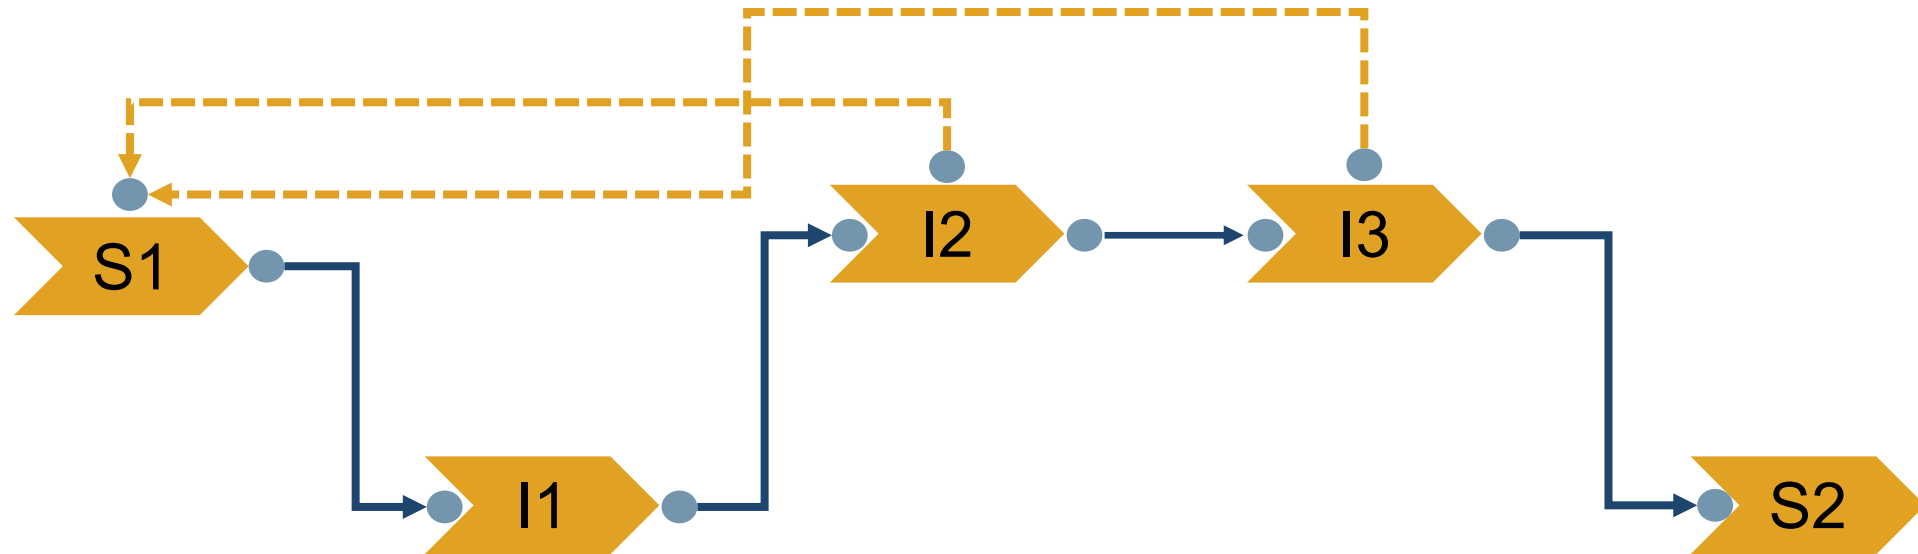

Nodes=S:2,I:3,D:2

Supplementary File 2



# chr2-65600546-65601136

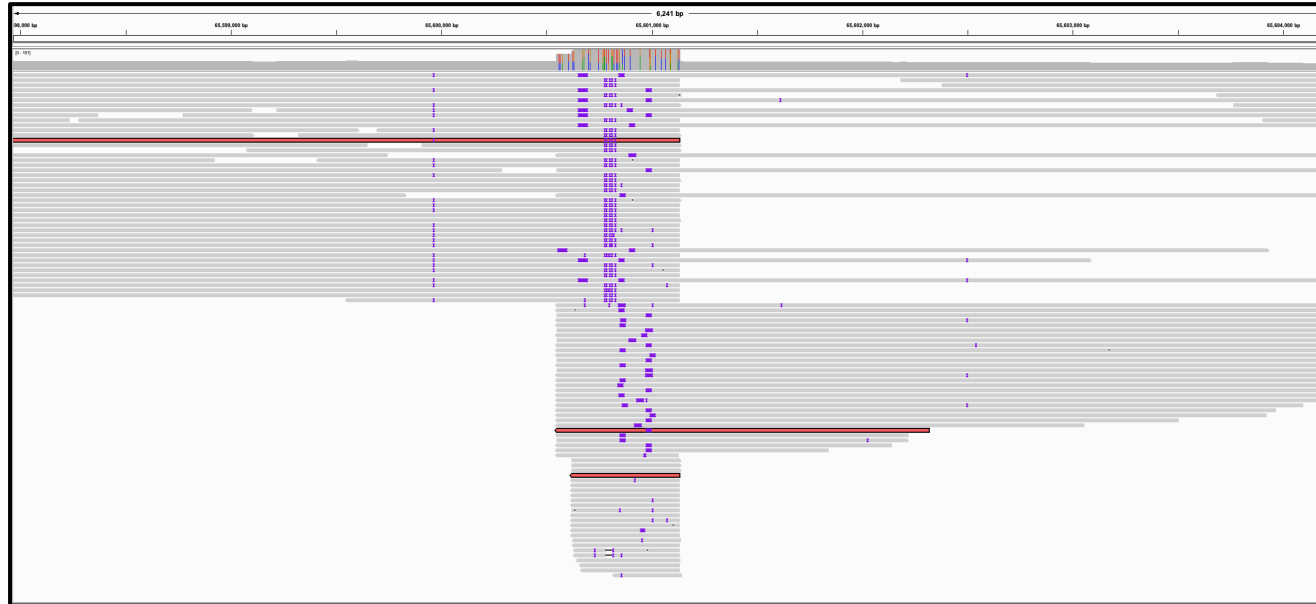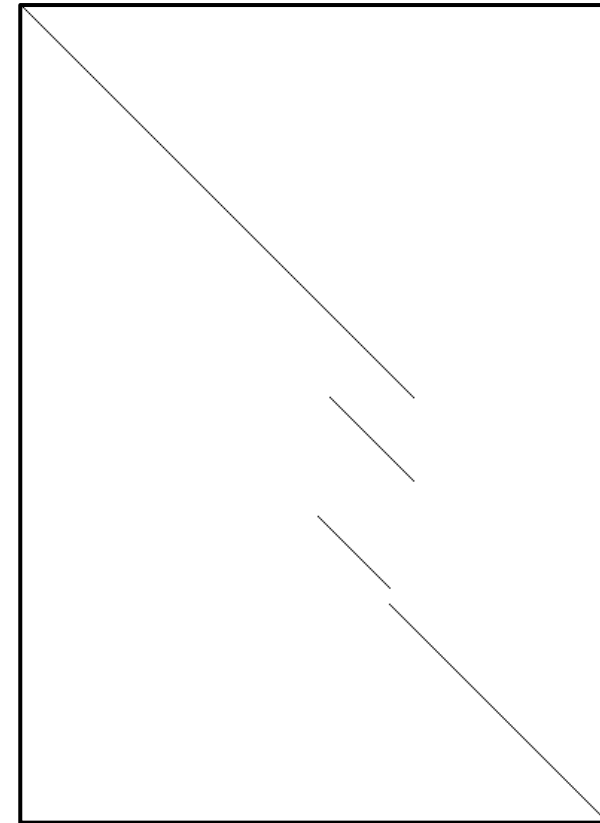

❖ **chr12-124438675-124439617**

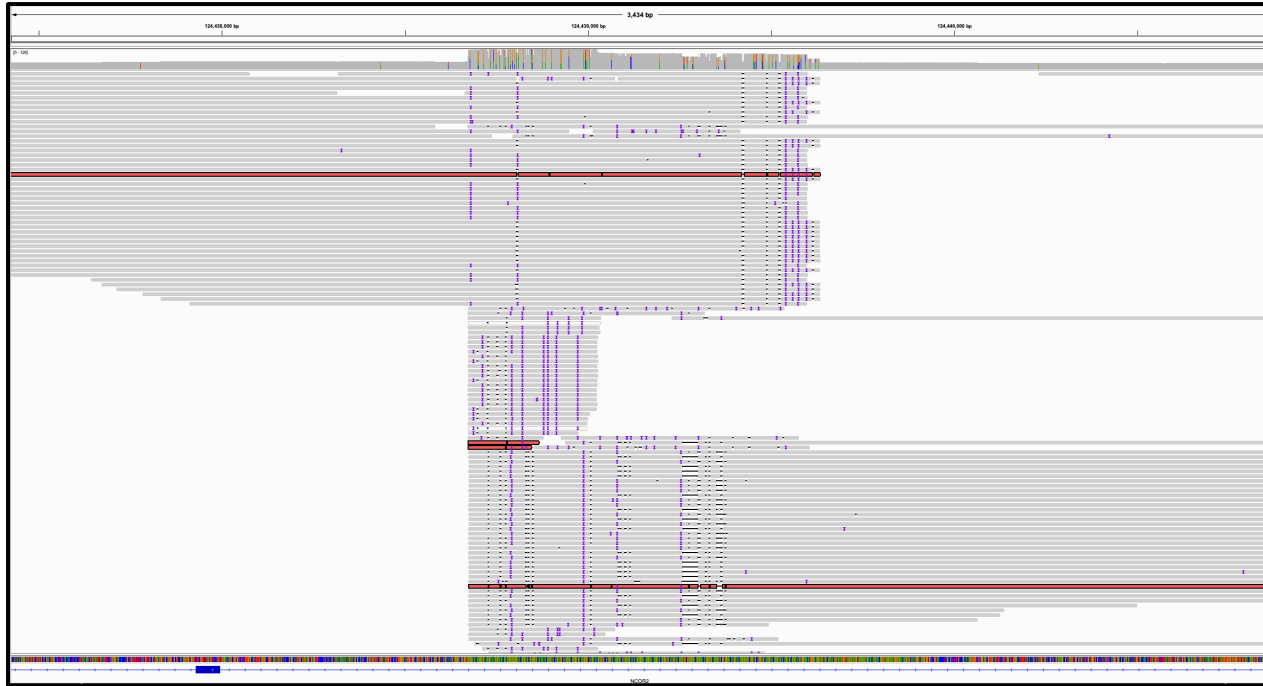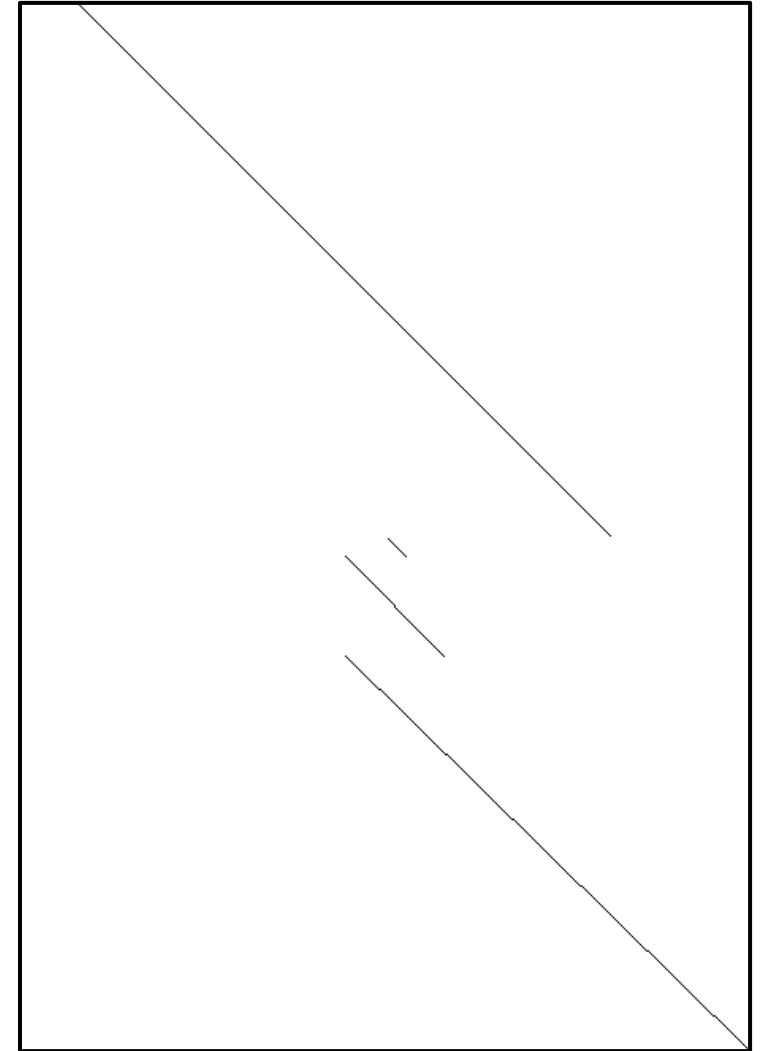

❖ **chr22-20075212-20075748**

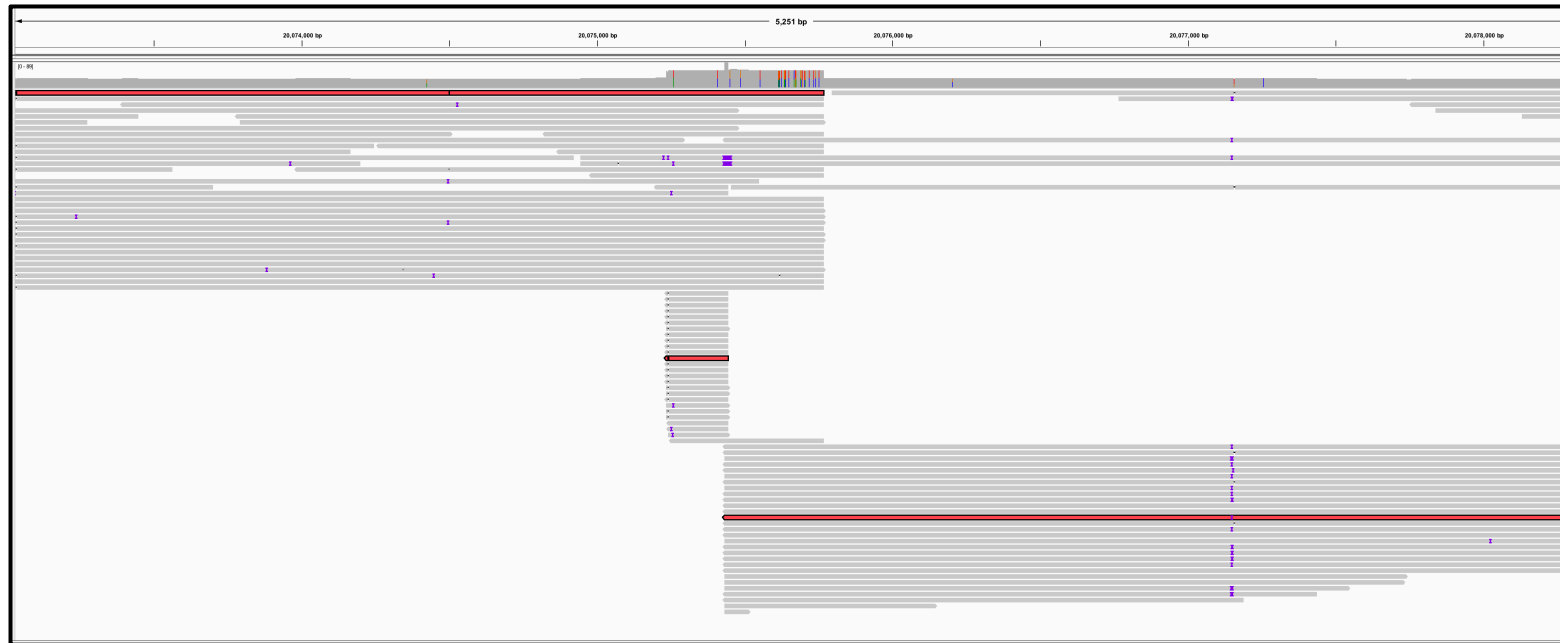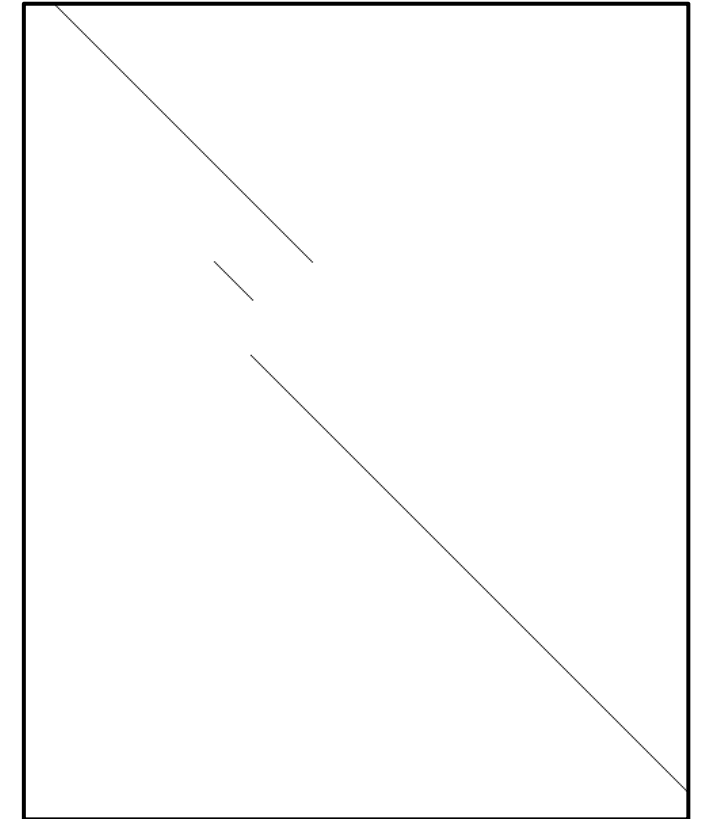



# GraphID-8

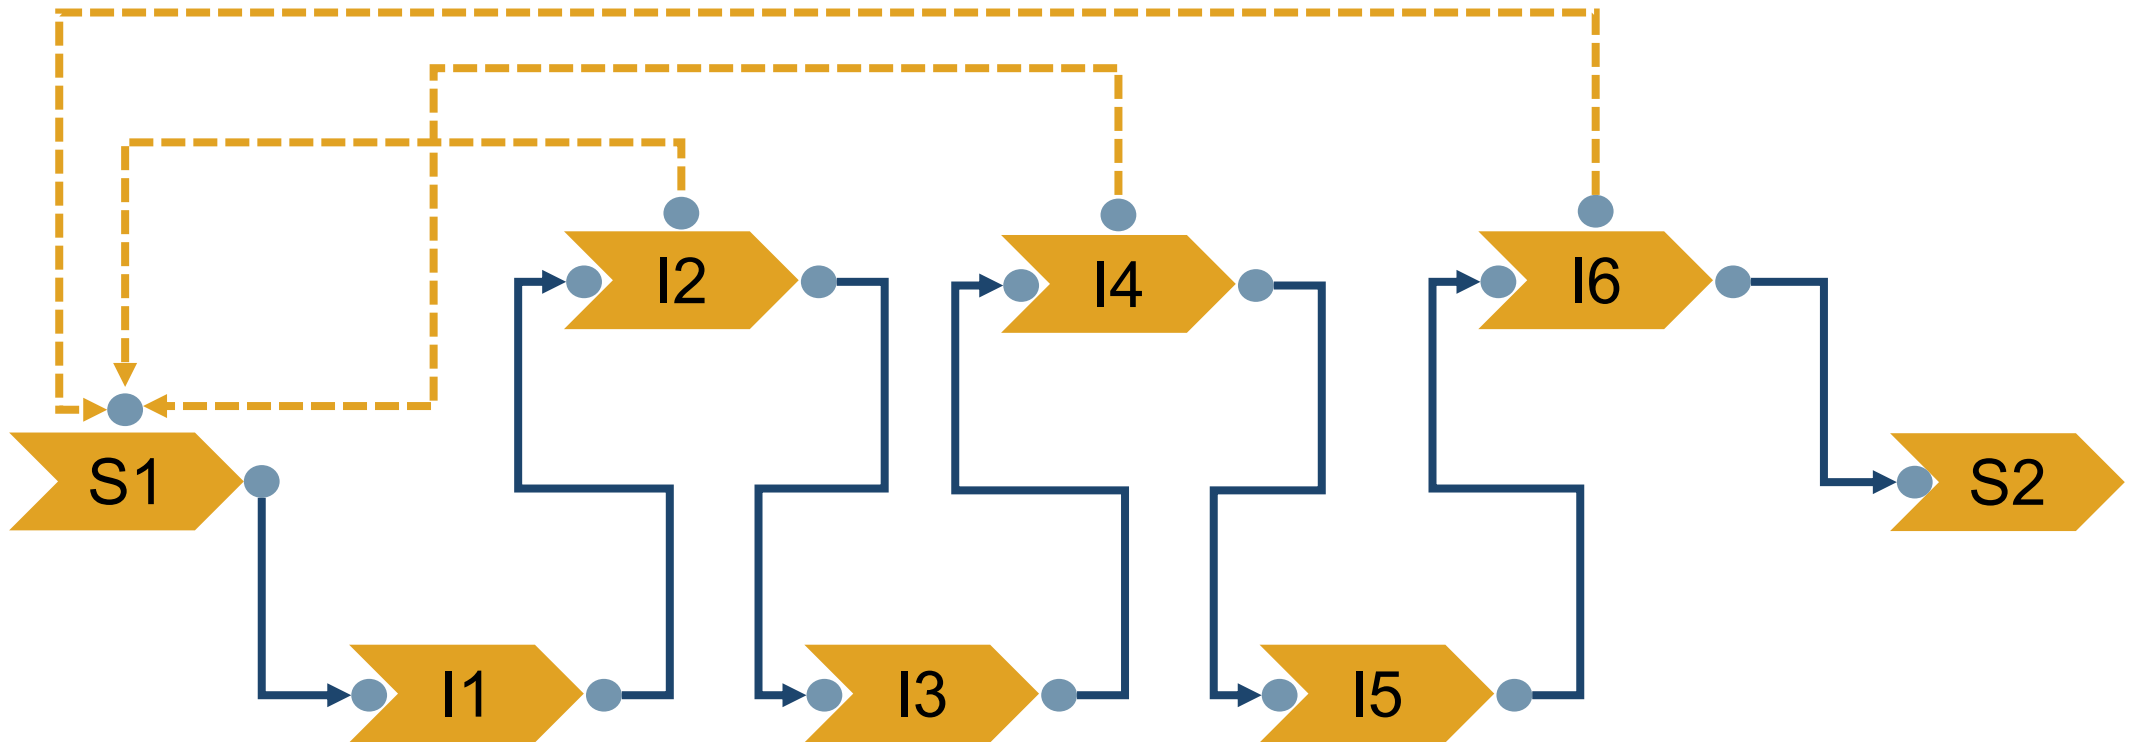

Nodes=S:2,I:6,D:3

❖ chr21-45055057-45055144

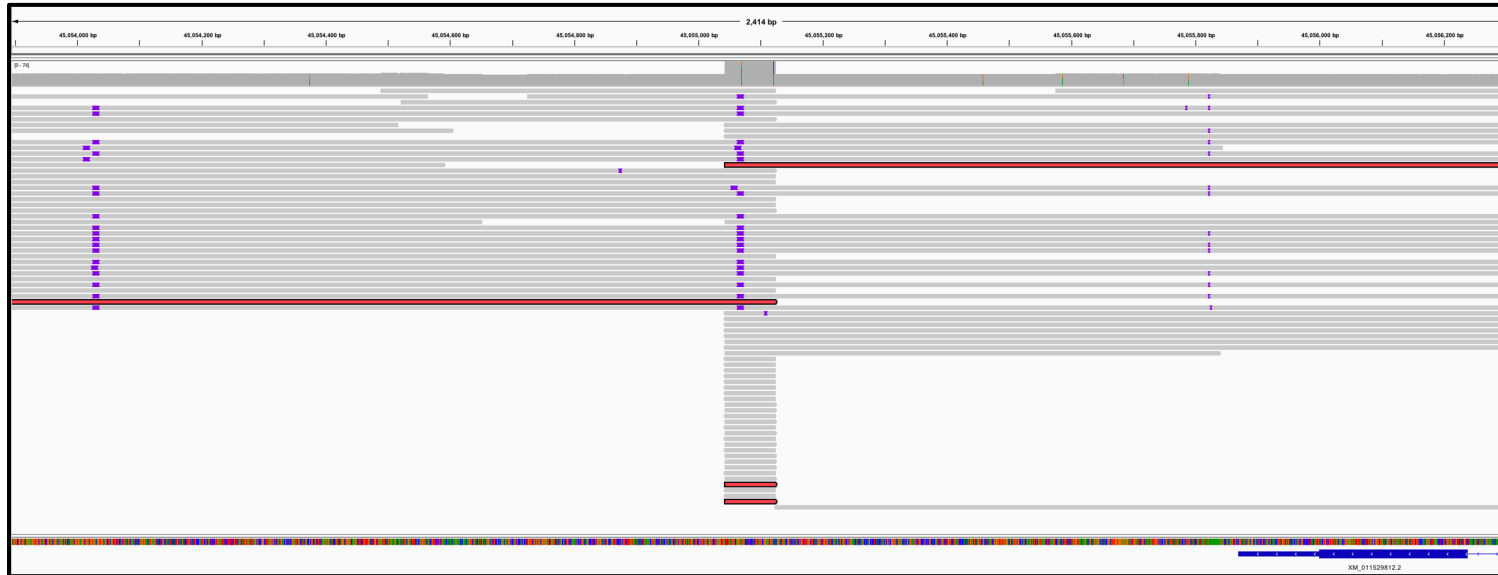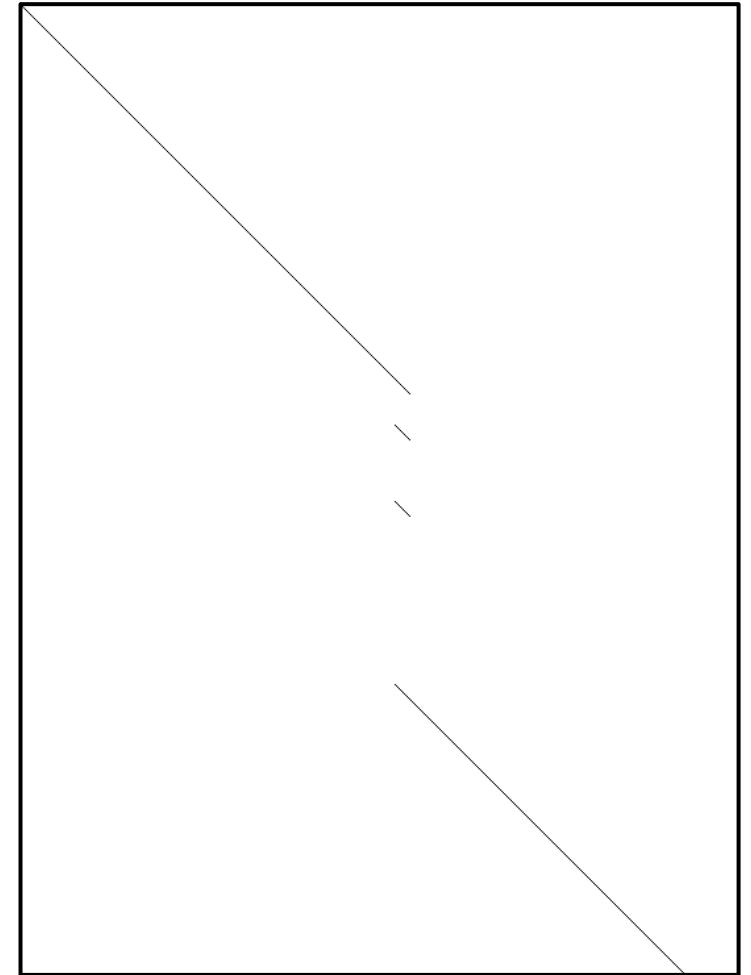

# GraphID-14

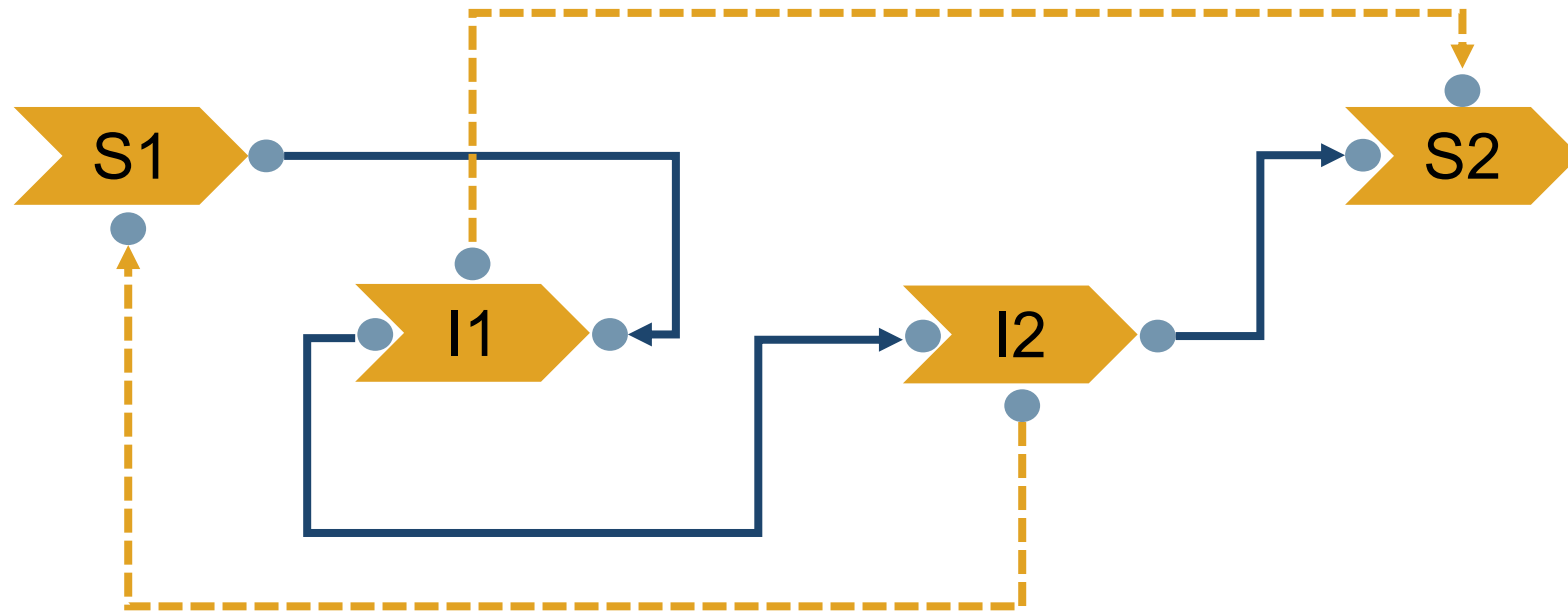

Nodes=S:2,I:2,D:2

❖ chr2-116216766-116224724

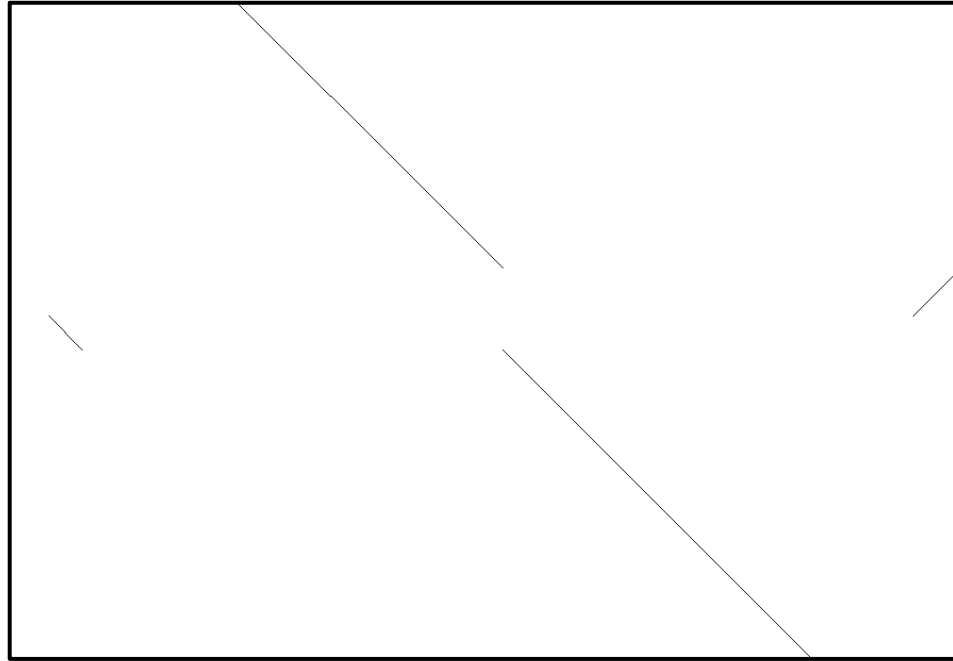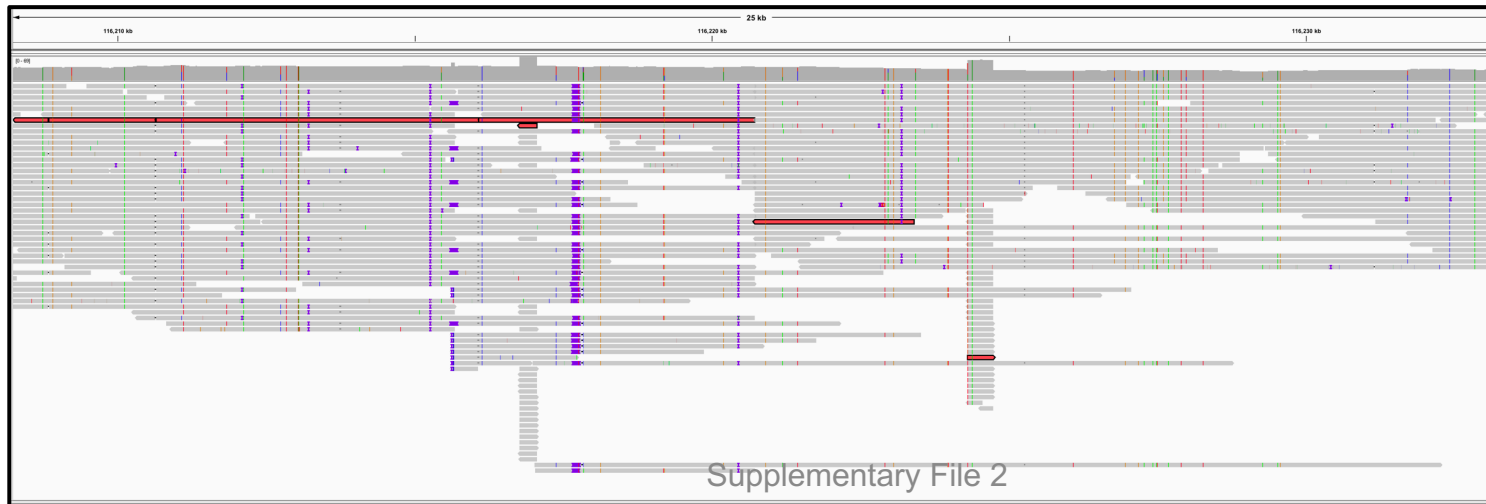

❖ chr10-125502145-125508663

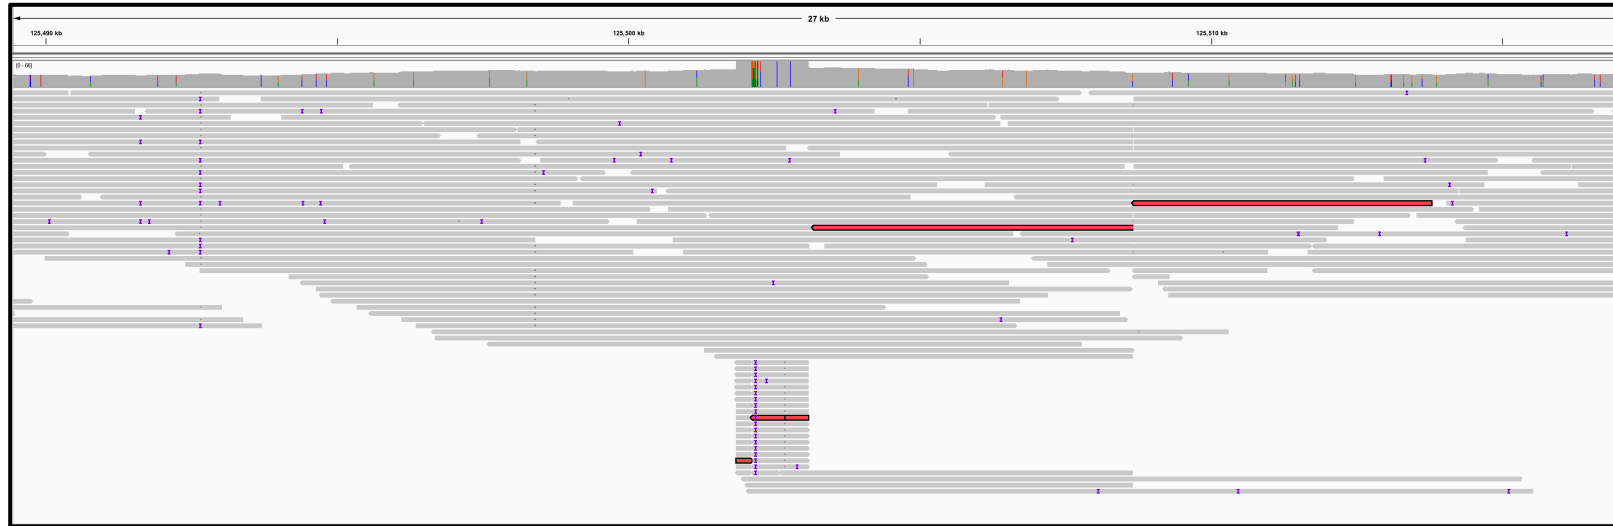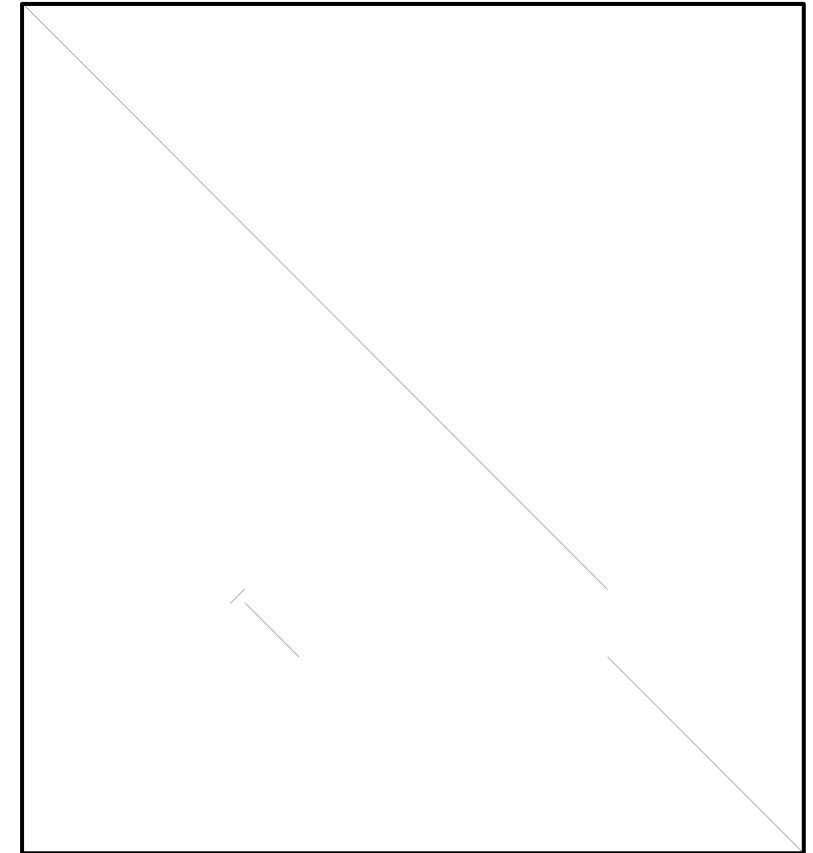

❖ chr13-88458707-88460622

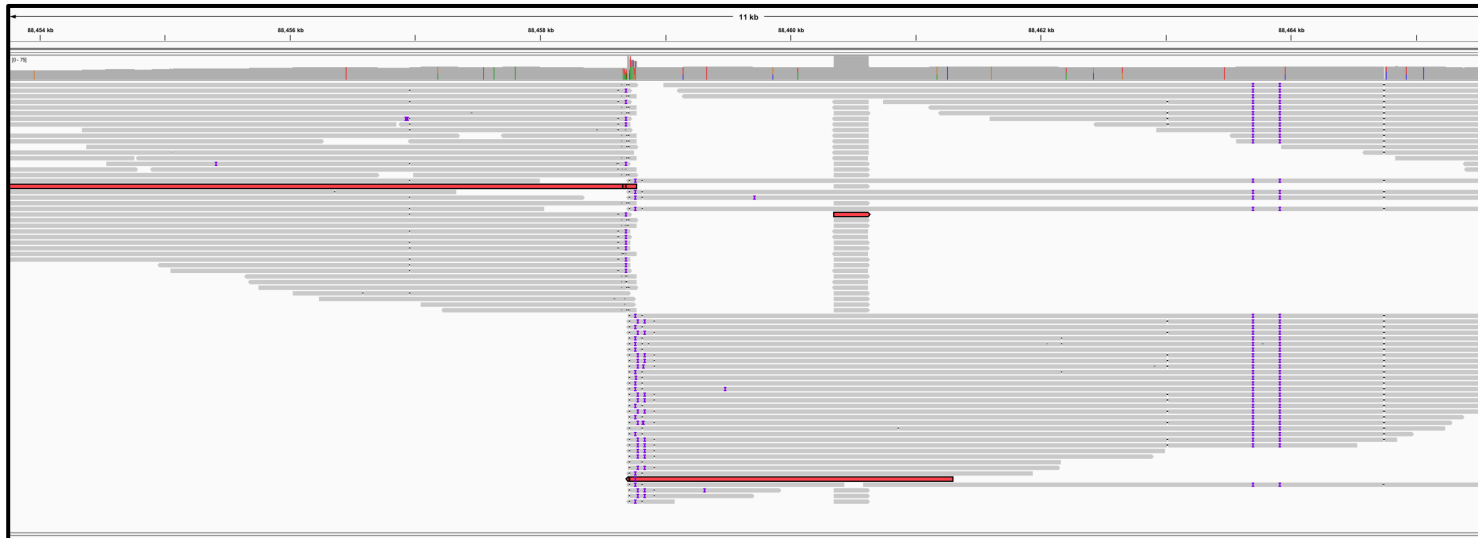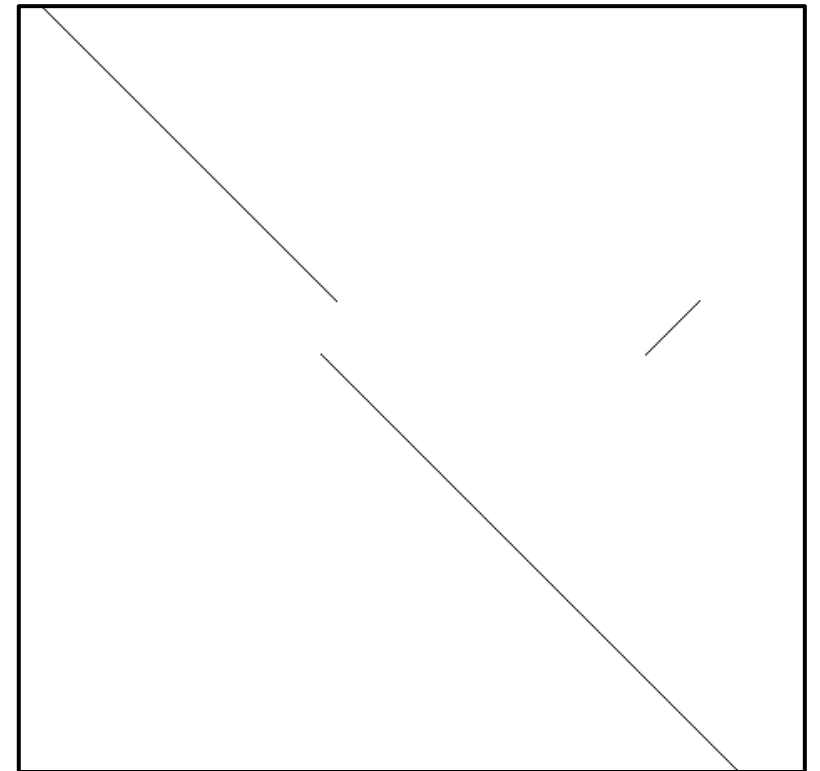

# GraphID-10

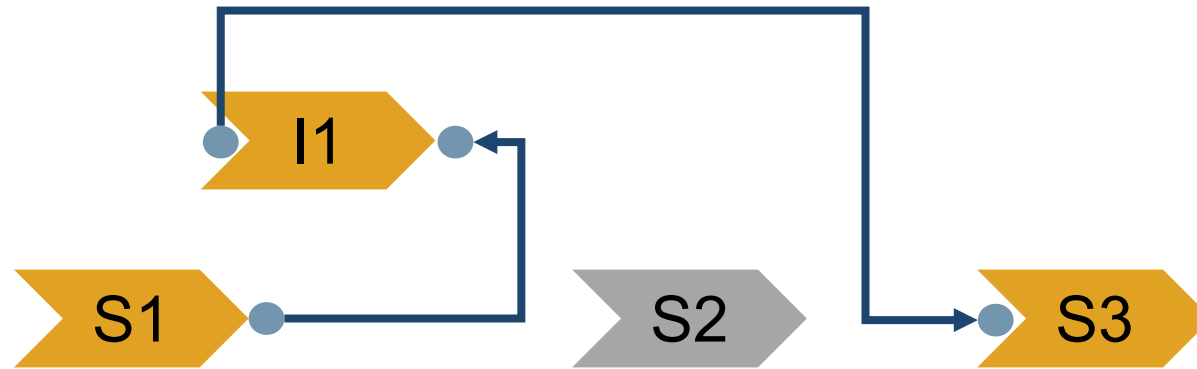

Nodes=S:3,I:1

❖ chr1-43593624-43594257

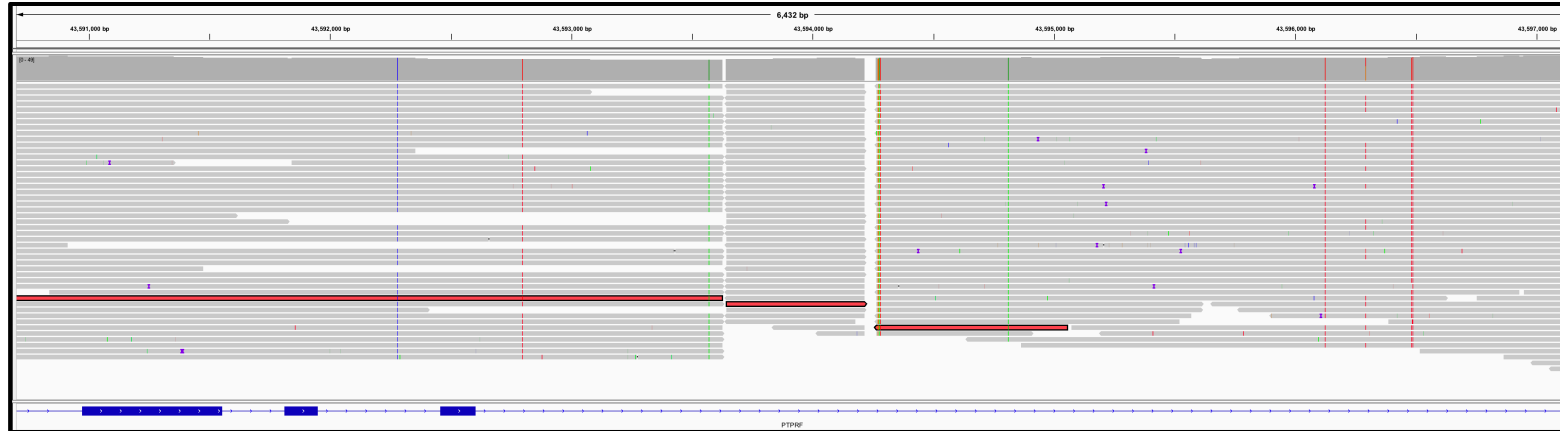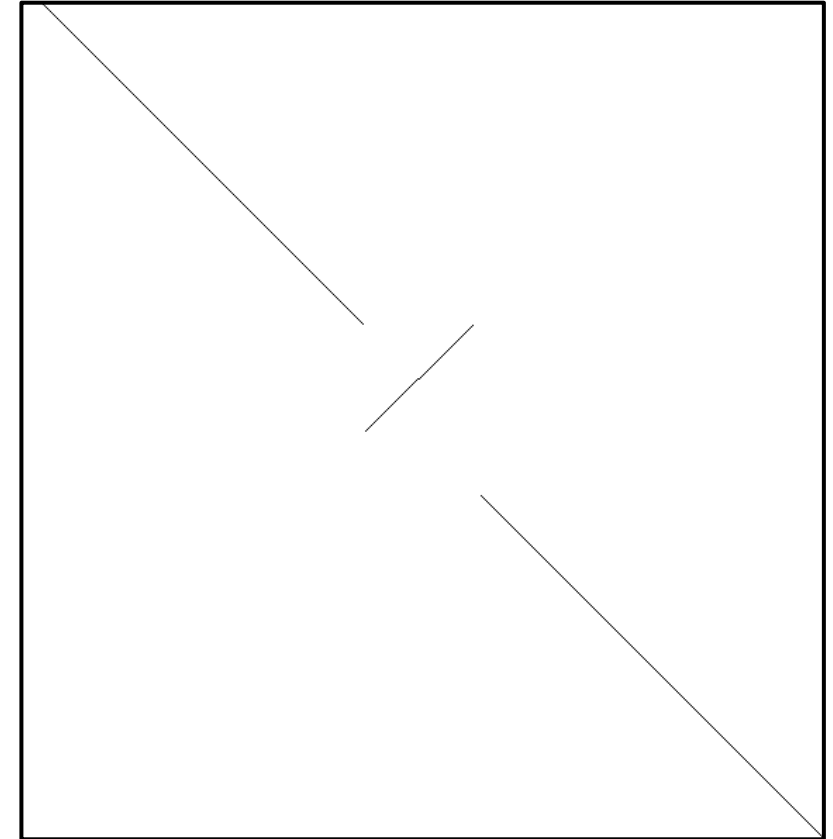



❖ chr4-145694076-145694384

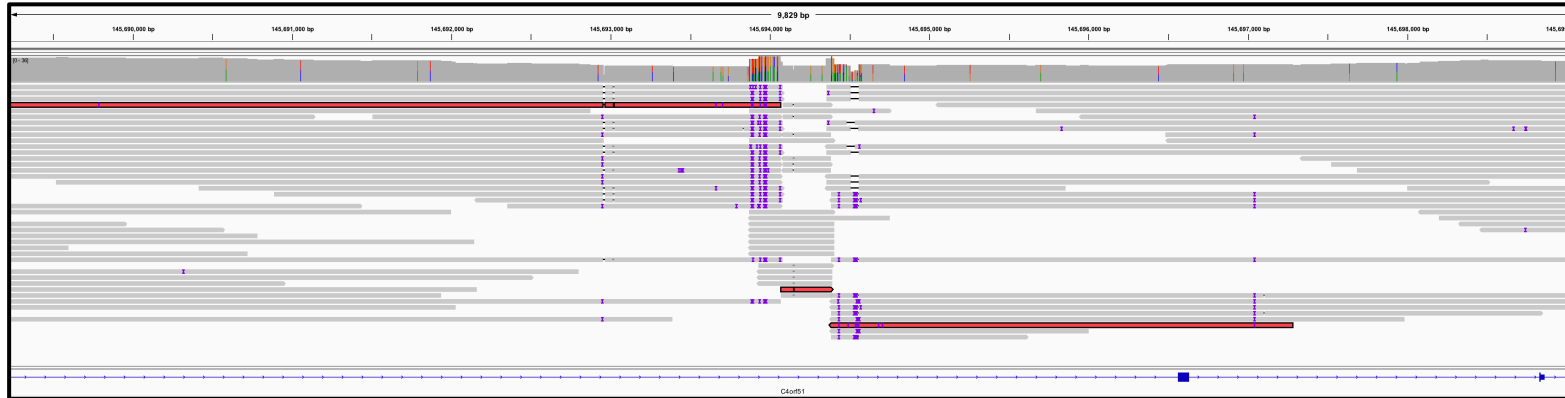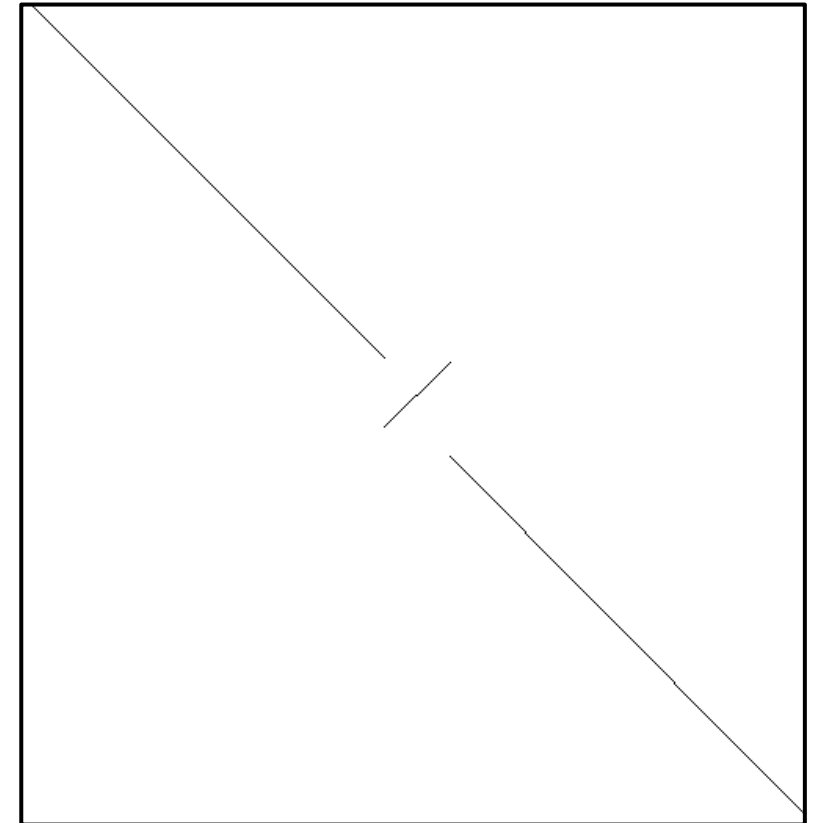

❖ chr6-89213914-89214231

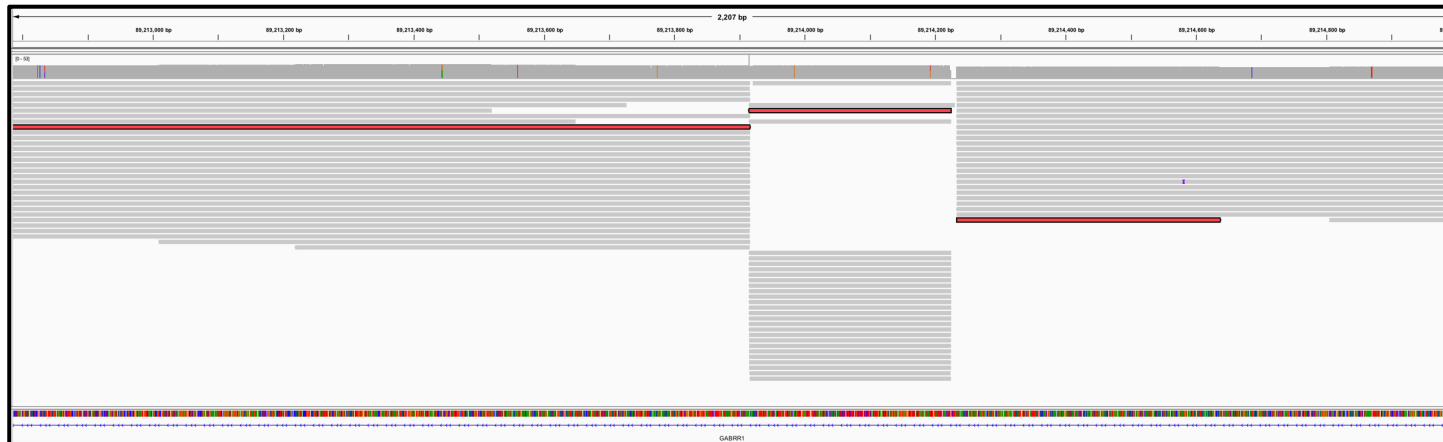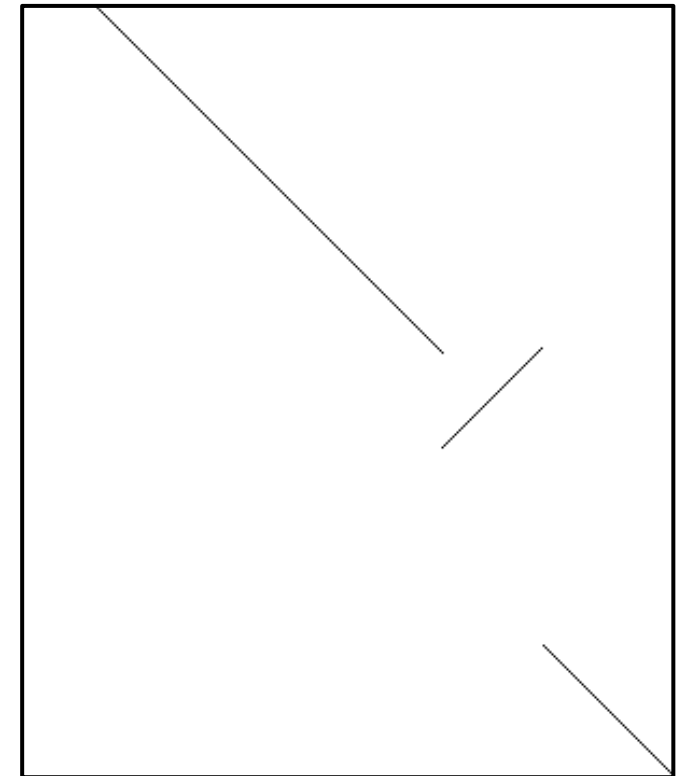



# chr6-94031356-94031699

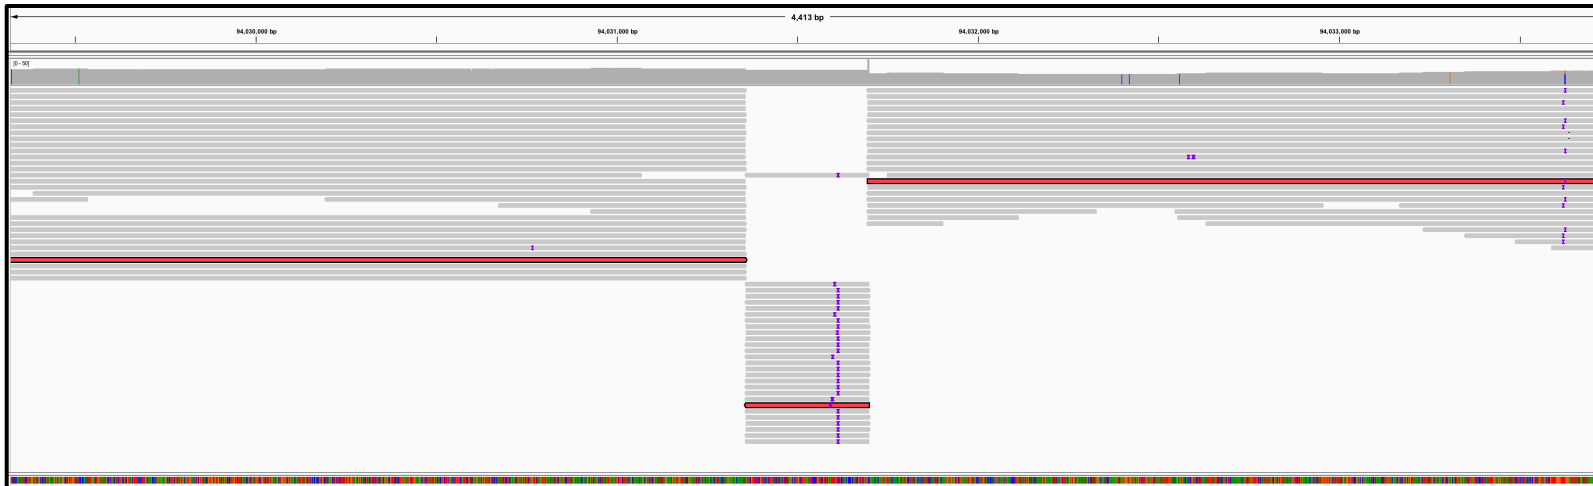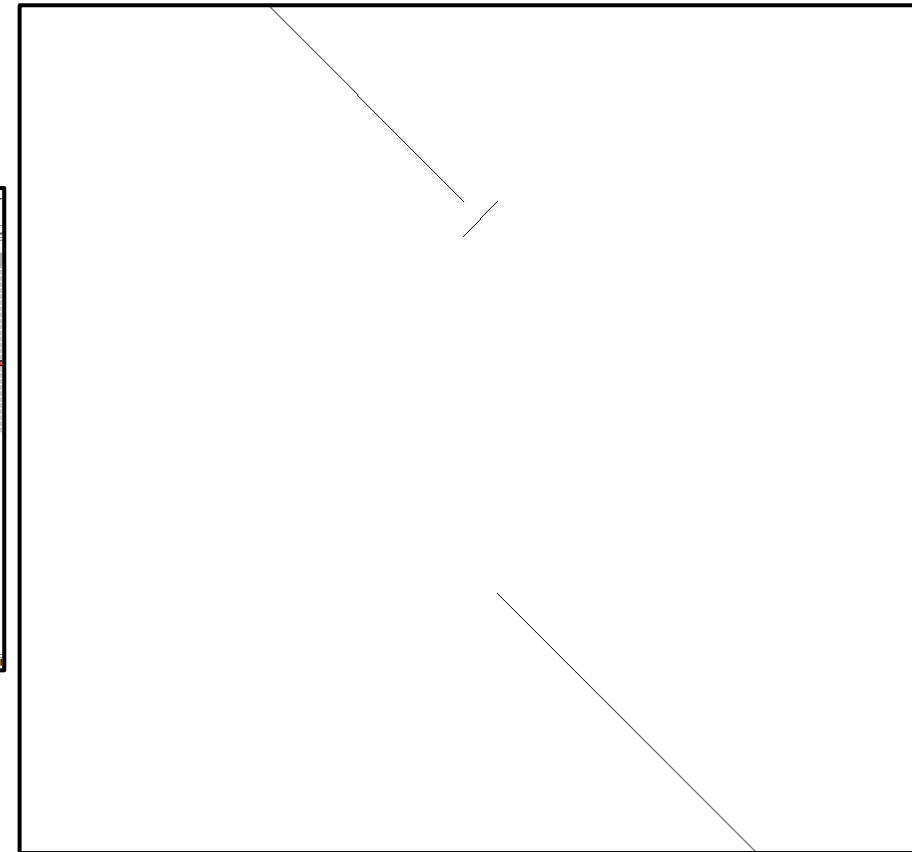

# GraphID-22

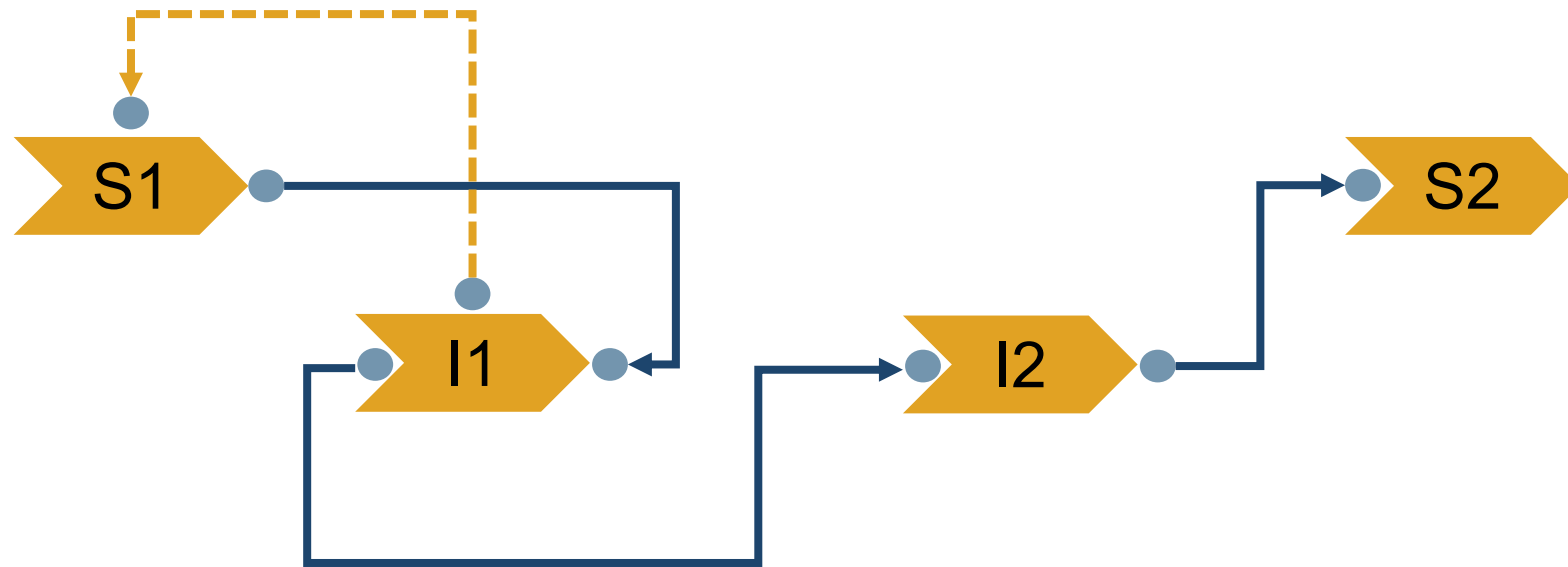

Nodes=S:2,I:2,D:1

❖ chr2-16225124-16225236

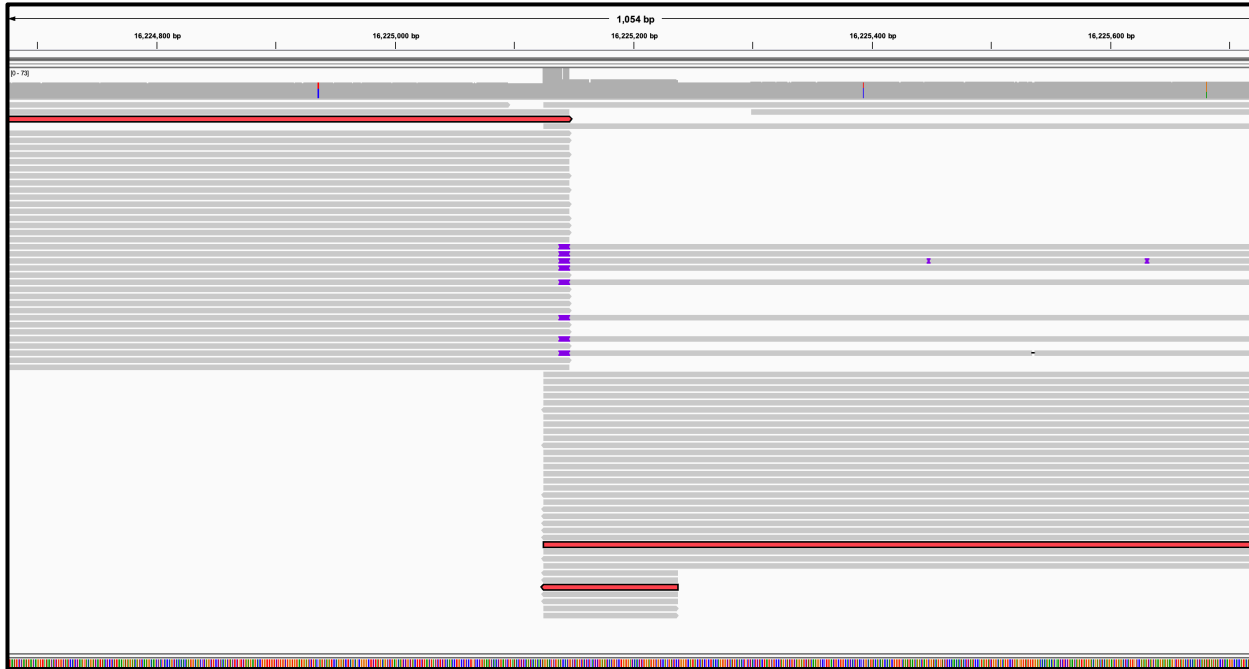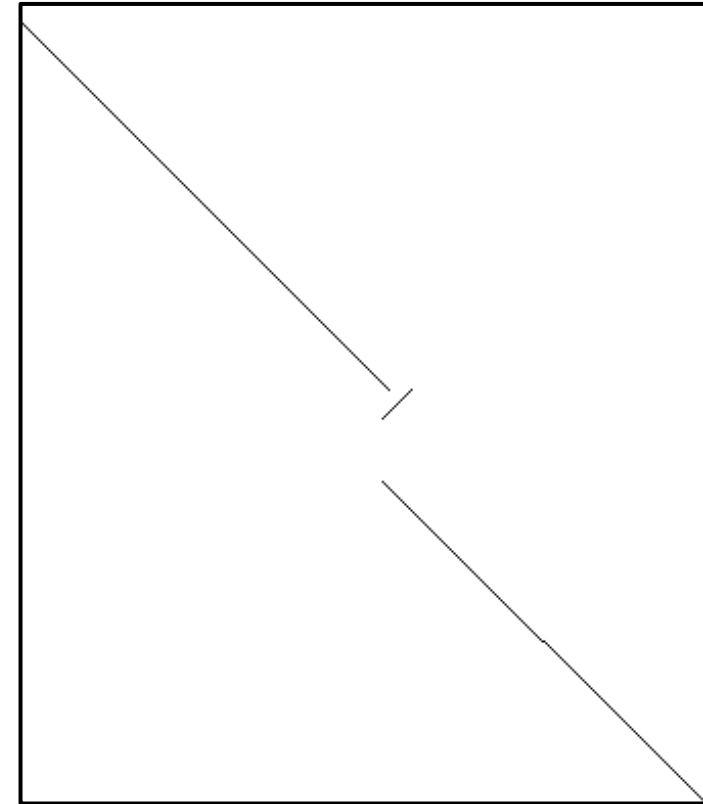



# chr8-84952507-84962077

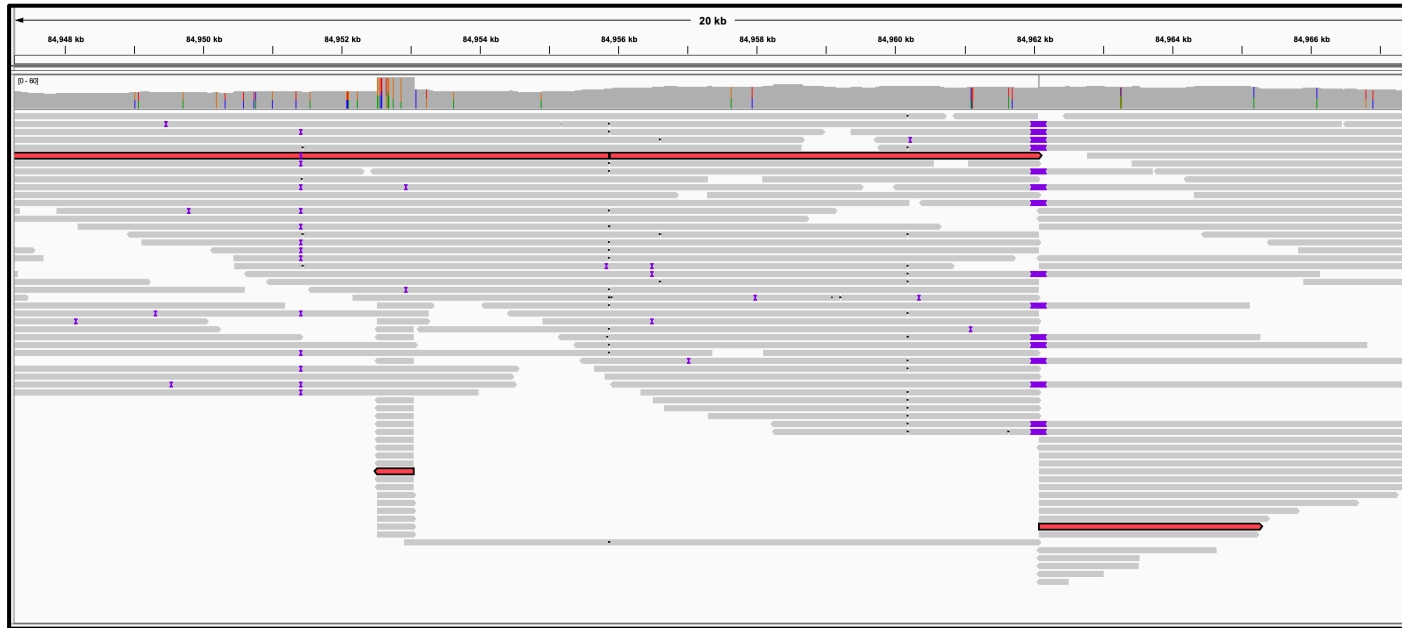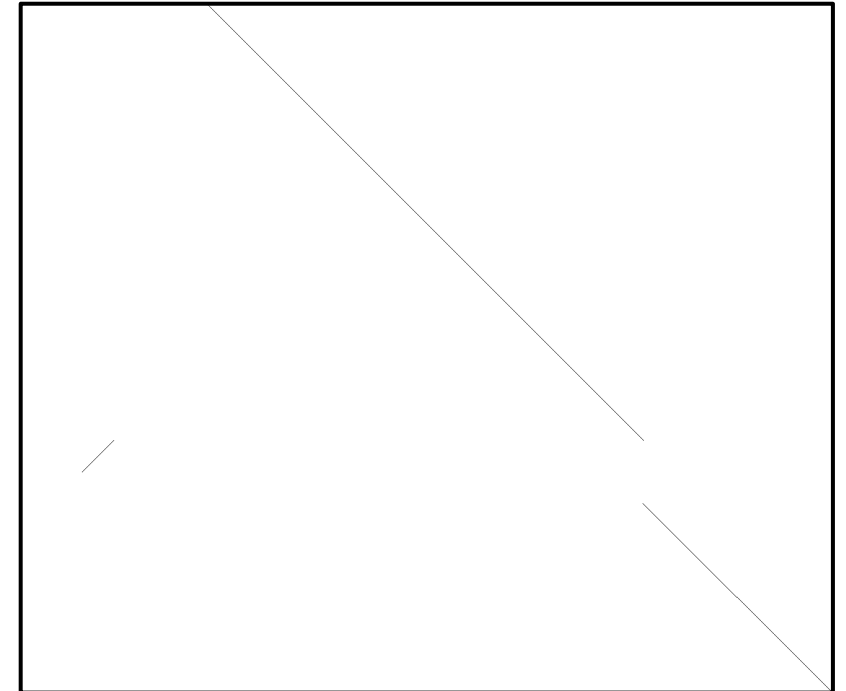

❖ chr10-98735100-98735257

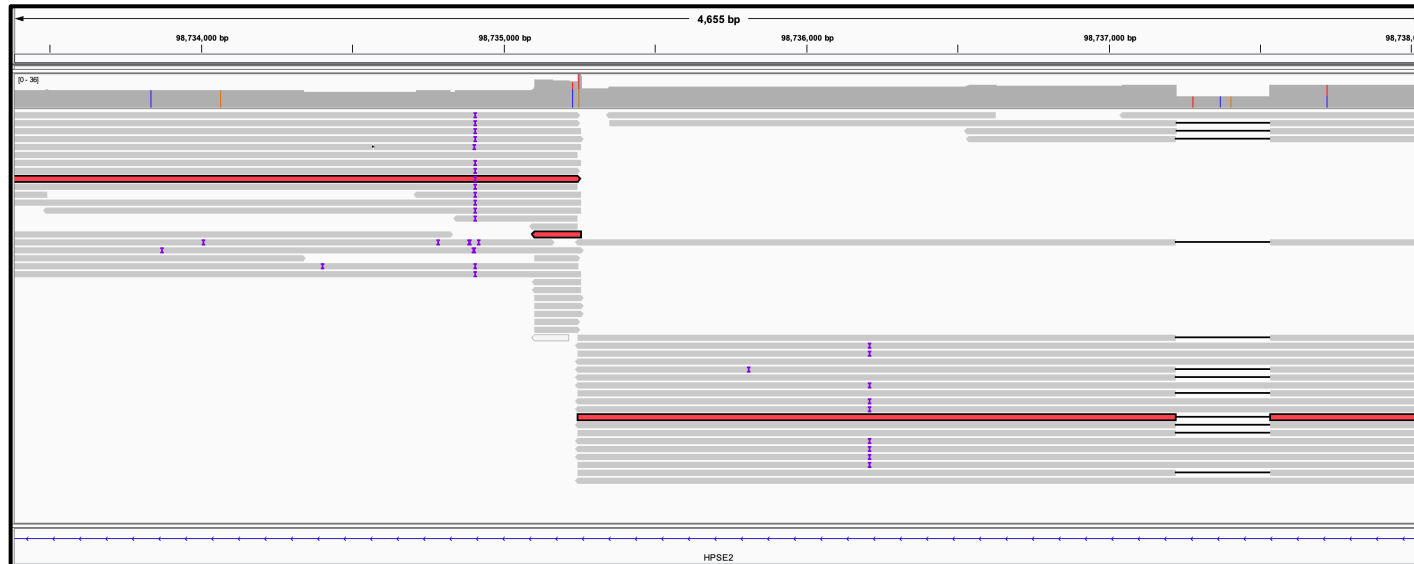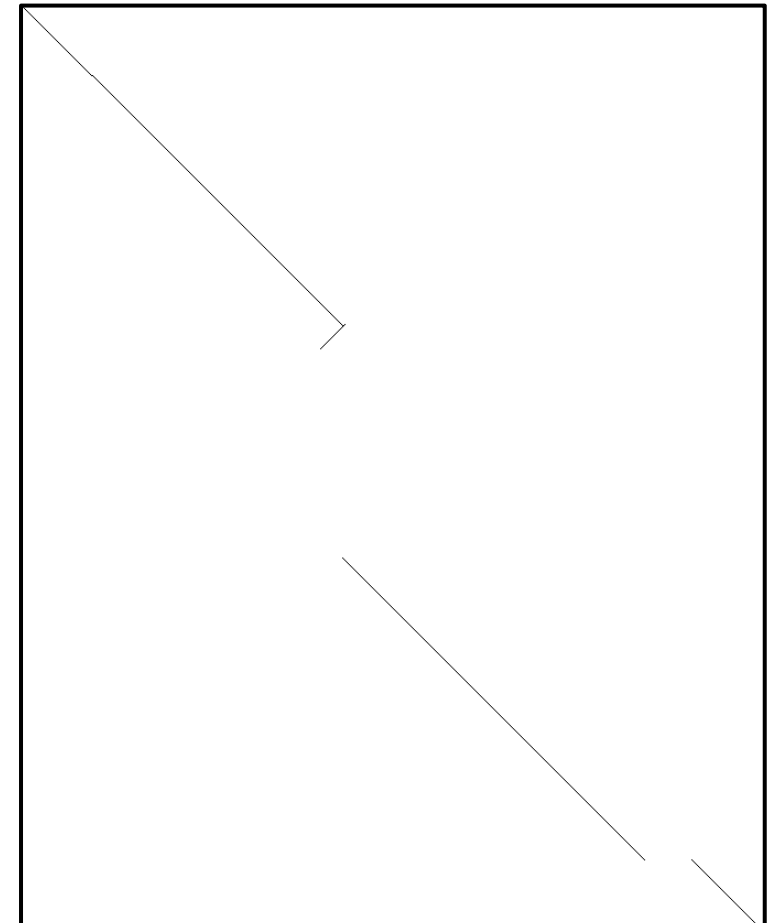

# GraphID-29

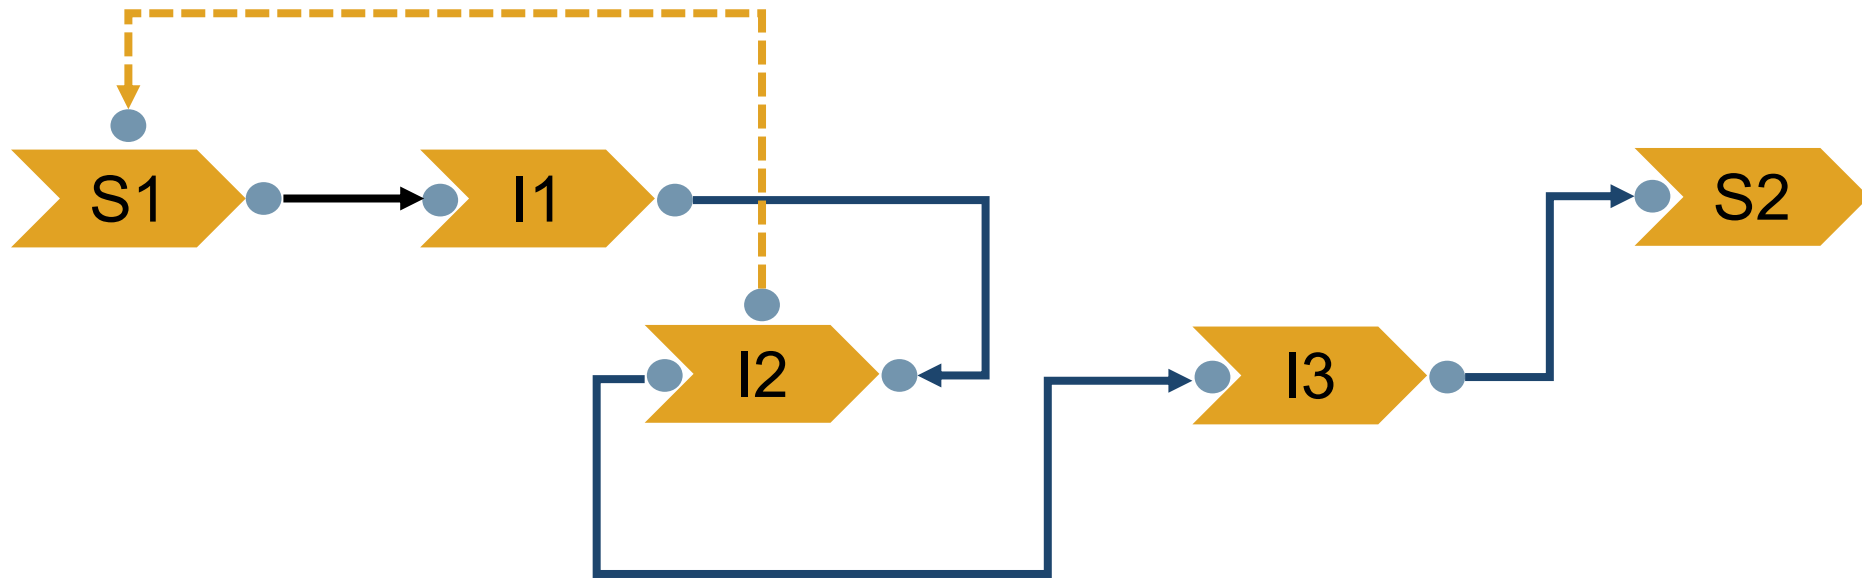

Nodes=S:3,I:3,D:1



❖ **chr3-128657347-128657553**

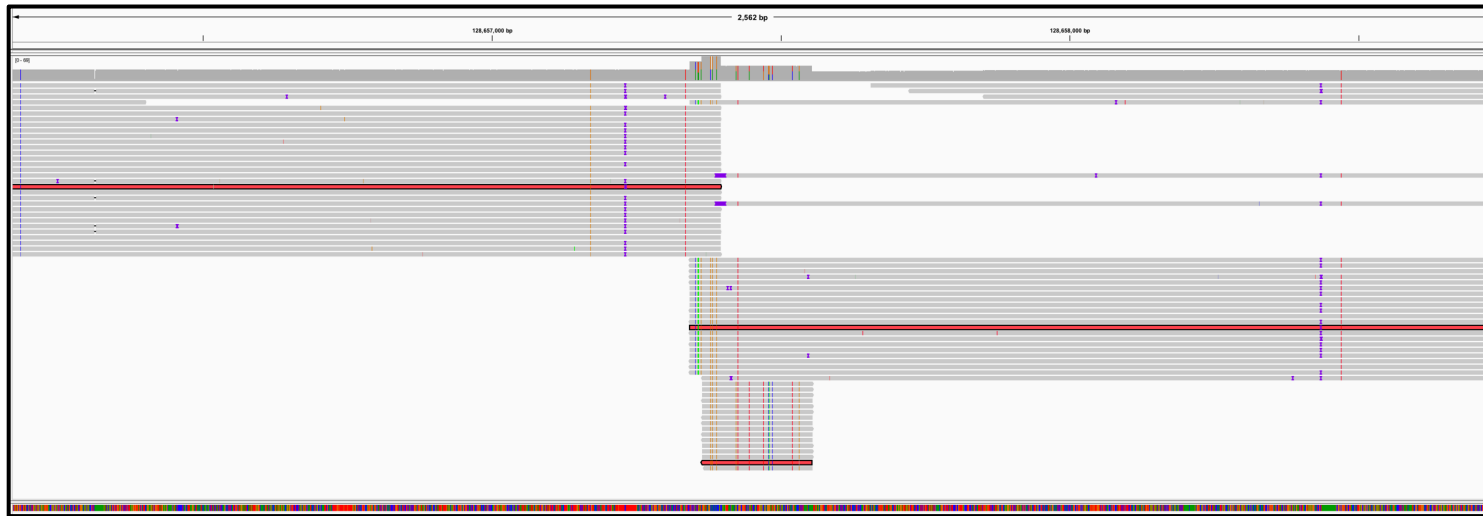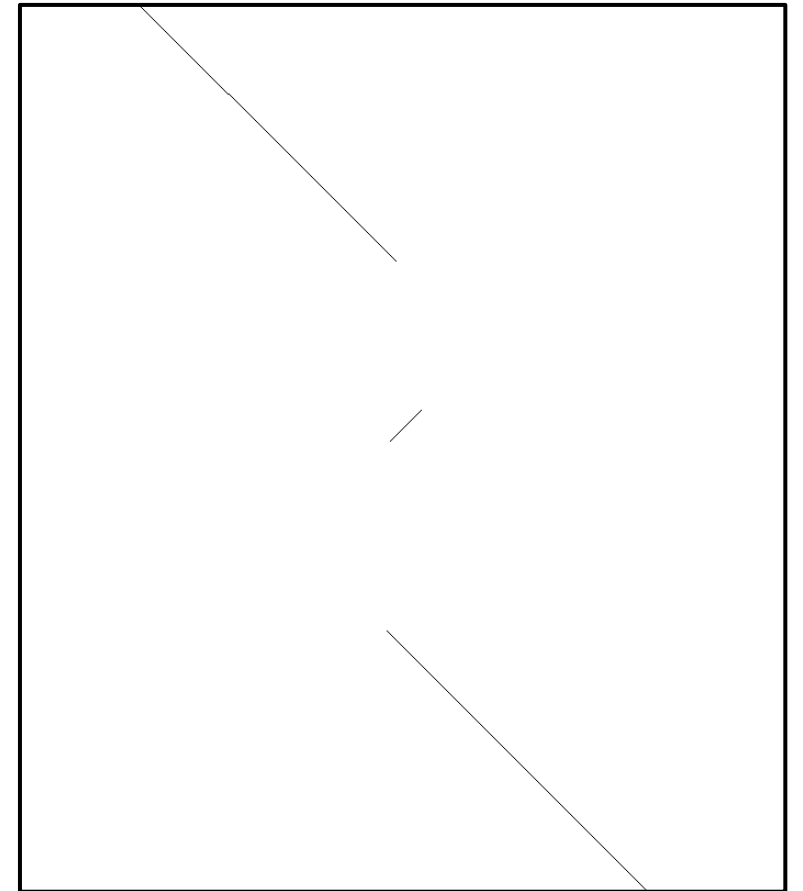

❖ chr11-126632640-126632771

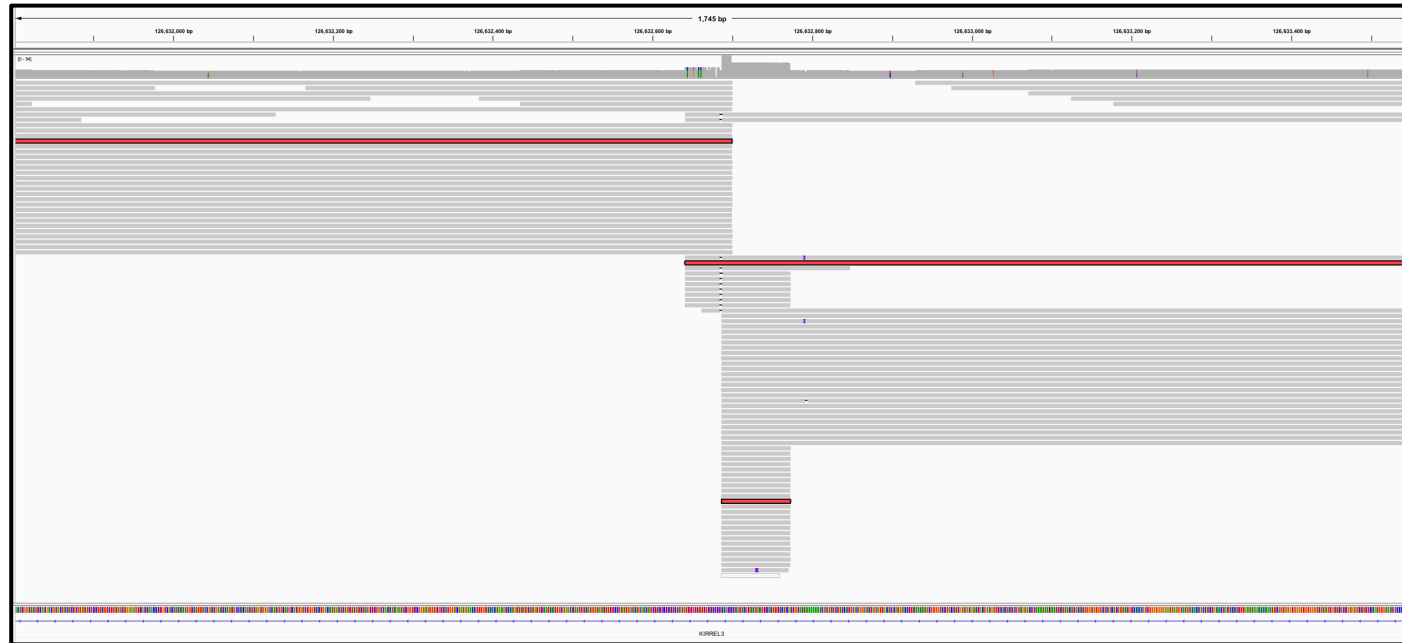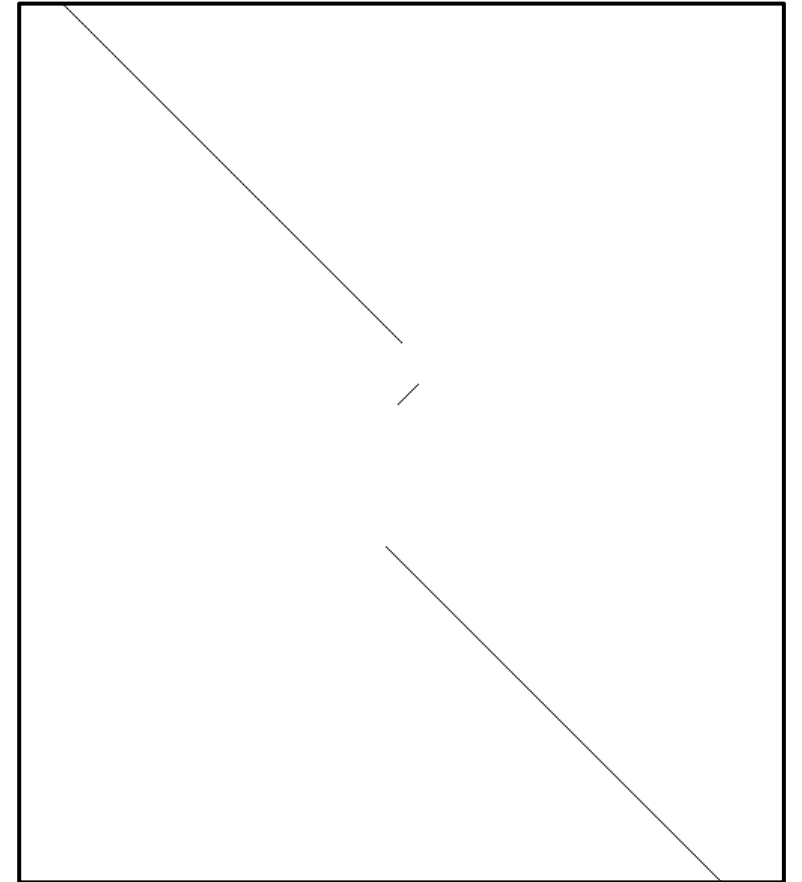

# ❖ chr12-65424994-65425174

```
S0 N SN:Z:chr12 SO:i:65411496 SR:i:0 LN:i:13567
S1 N SN:Z:chr12 SO:i:65425002 SR:i:0 LN:i:174
S2 N SN:Z:chr12 SO:i:65425057 SR:i:0 LN:i:1966
I0 N SN:Z:m54329U_190827_173812/127861958/ccs SO:i:13569 SR:i:0 LN:i:226
I1 N SN:Z:m54329U_190827_173812/127861958/ccs SO:i:13971 SR:i:0 LN:i:237
I2 N SN:Z:m54329U_190827_173812/127861958/ccs SO:i:14209 SR:i:0 LN:i:61 DP:S:S0:65424995
S0 + I0 + 0M SR:i:0
I0 + S1 - 0M SR:i:0
S1 - I1 + 0M SR:i:0
I1 + I2 + 0M SR:i:0
I2 + S2 + 0M SR:i:0
```

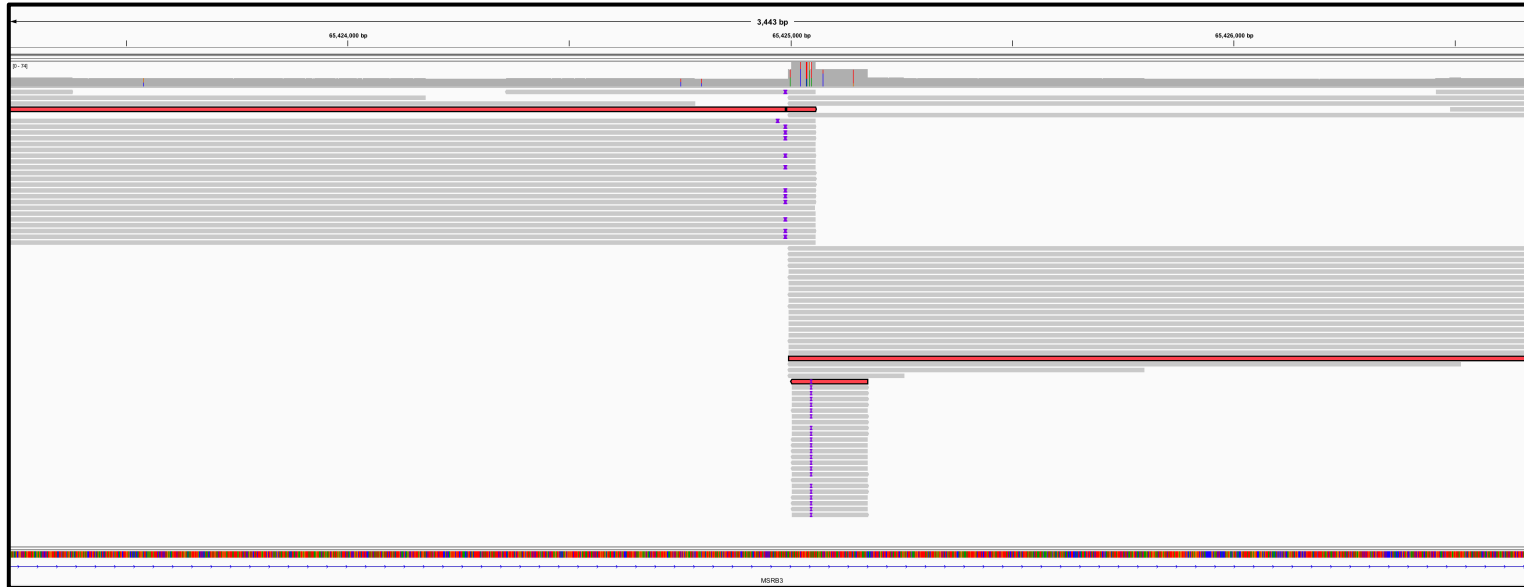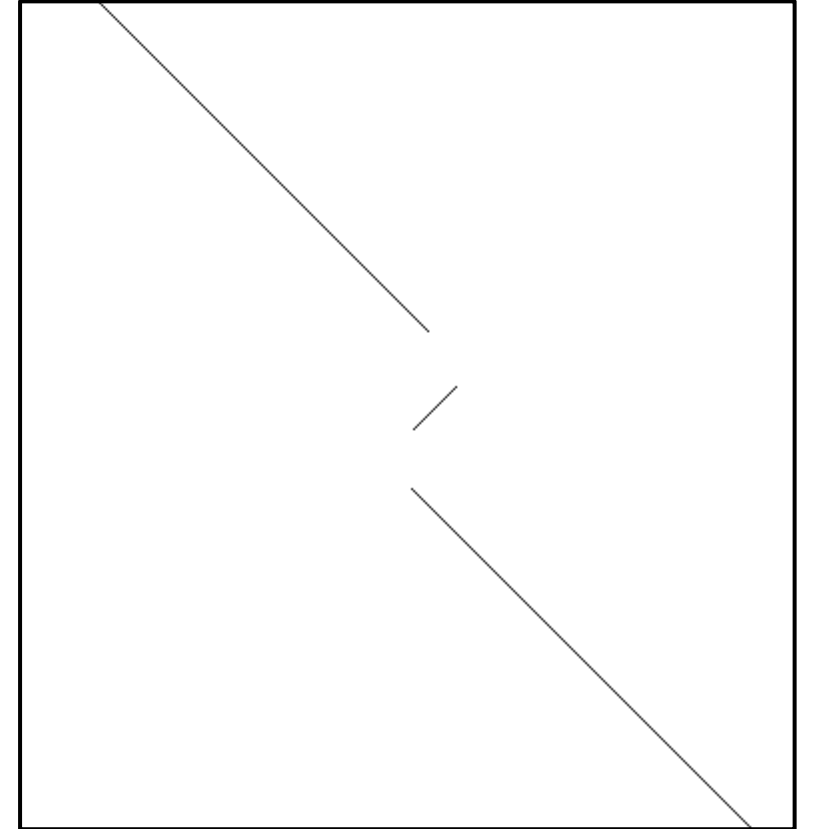

# GraphID-5

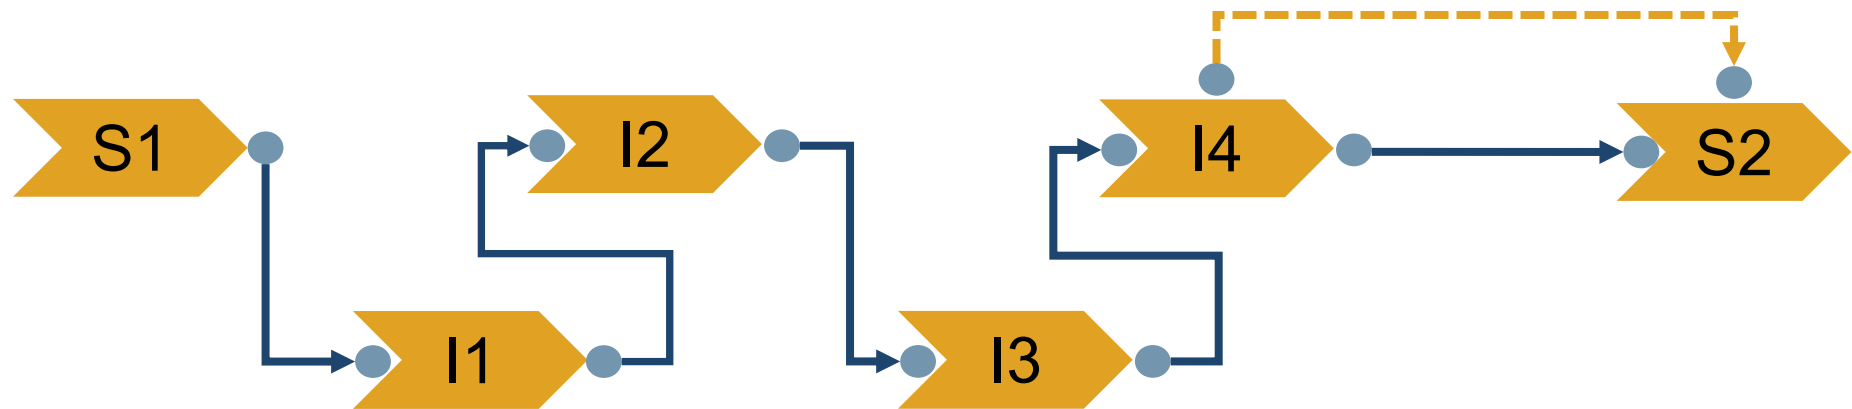

Nodes=S:2,I:4,D:1

❖ chr14-65791559-65791687

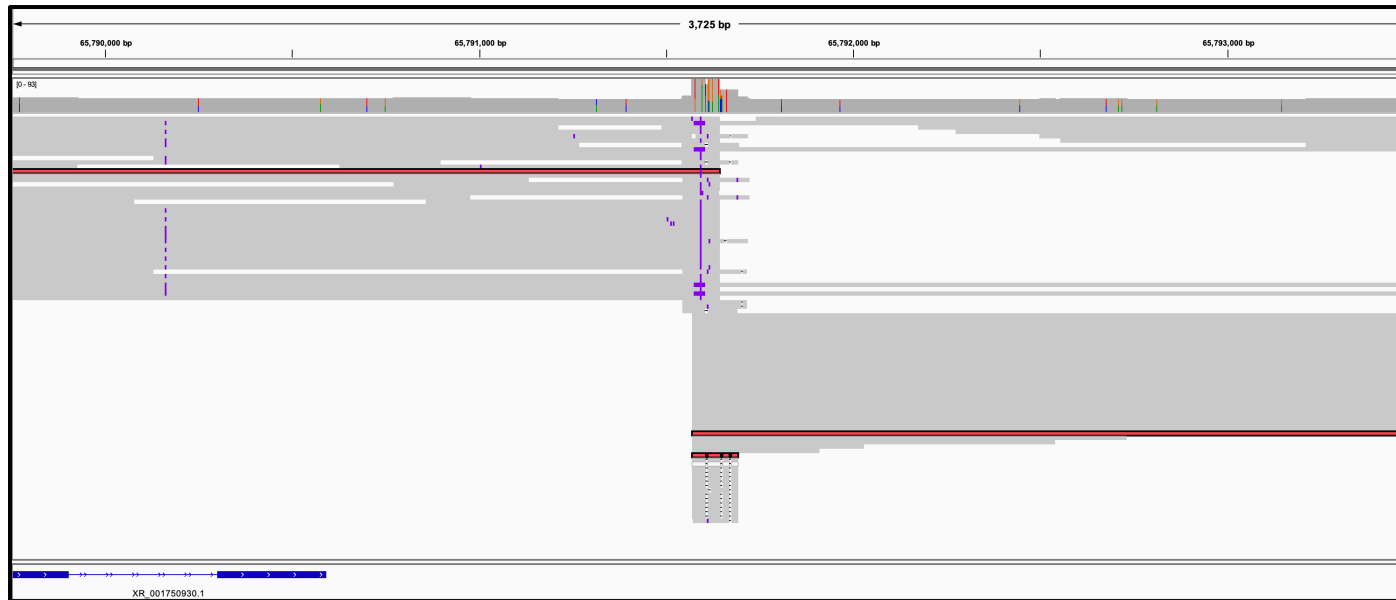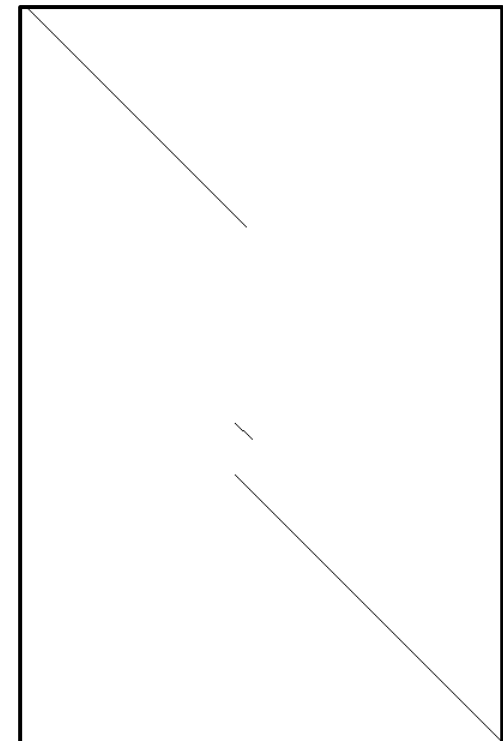

# GraphID-16

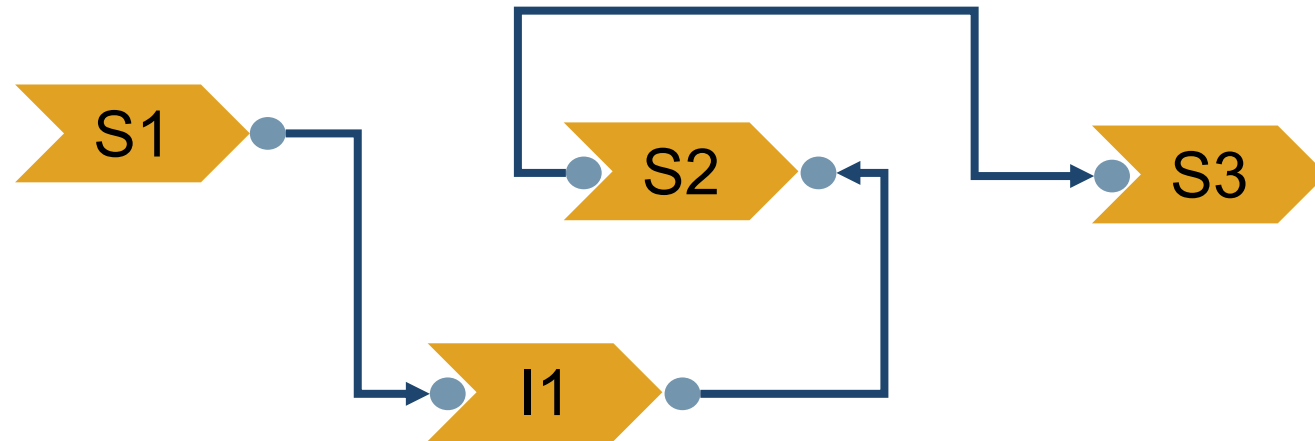

Nodes=S:3,I:1

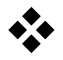

# chr5-83060043-83060167

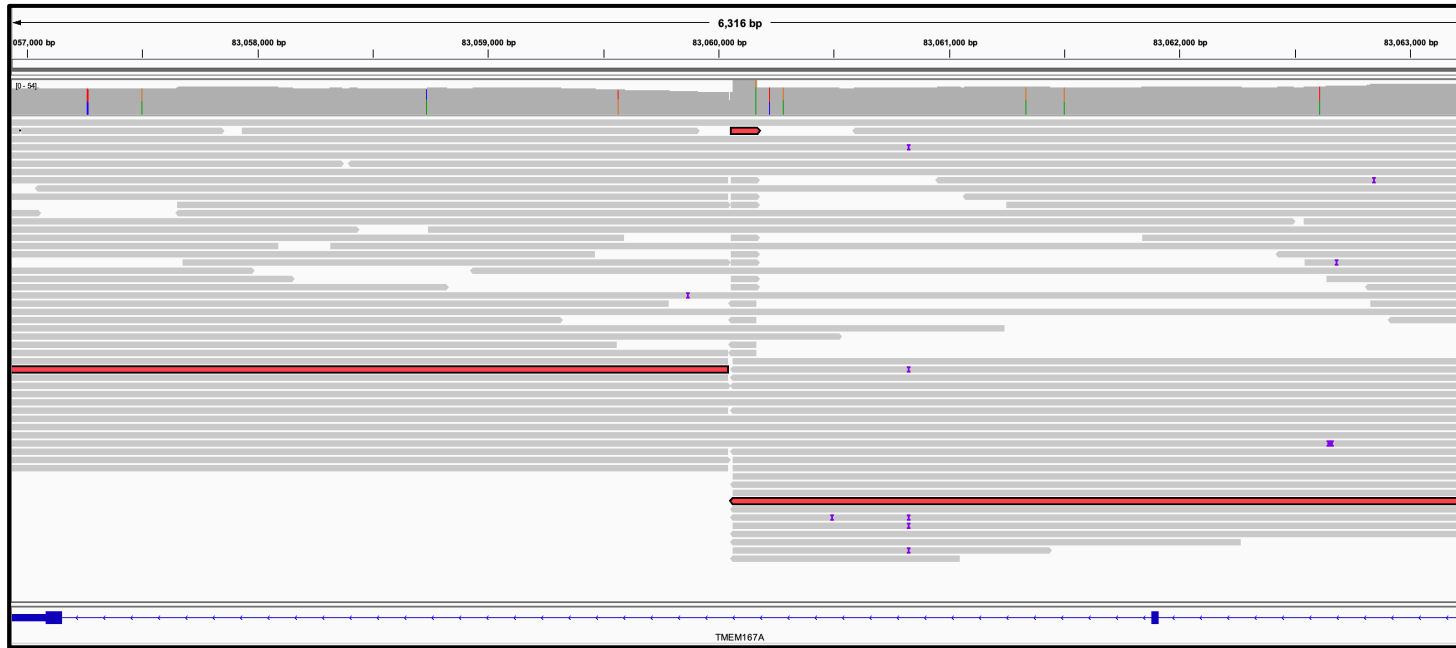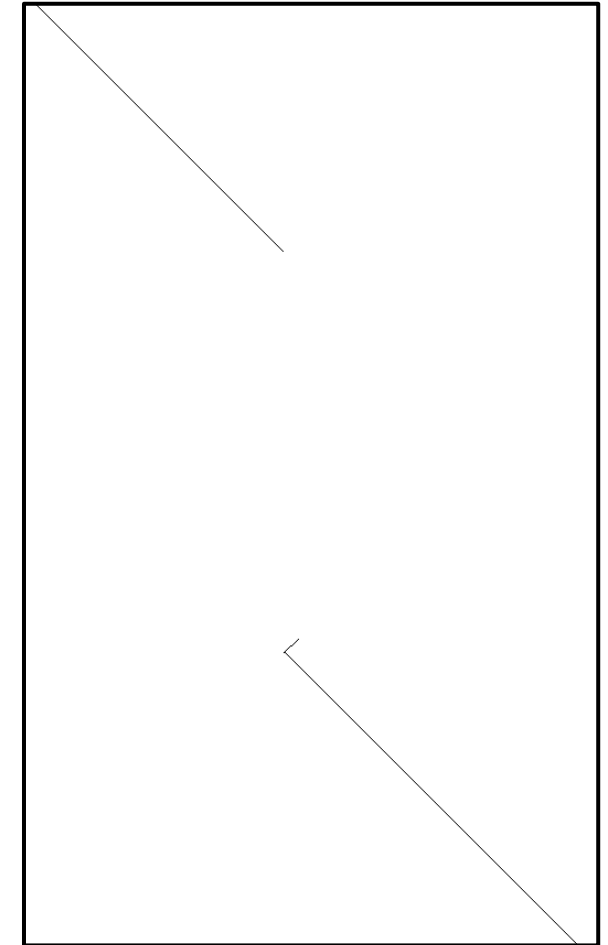

# GraphID-18

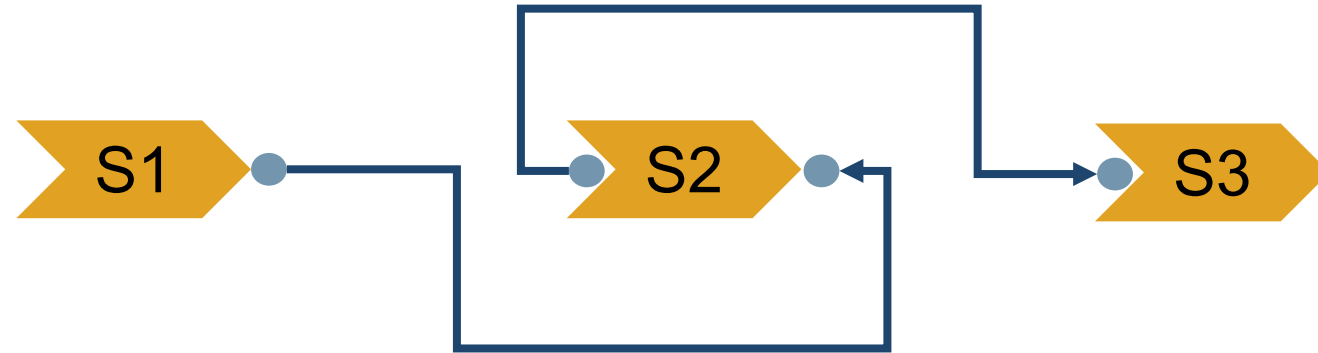

Nodes=S:3



❖ chr1-205209504-205209664-9618-72

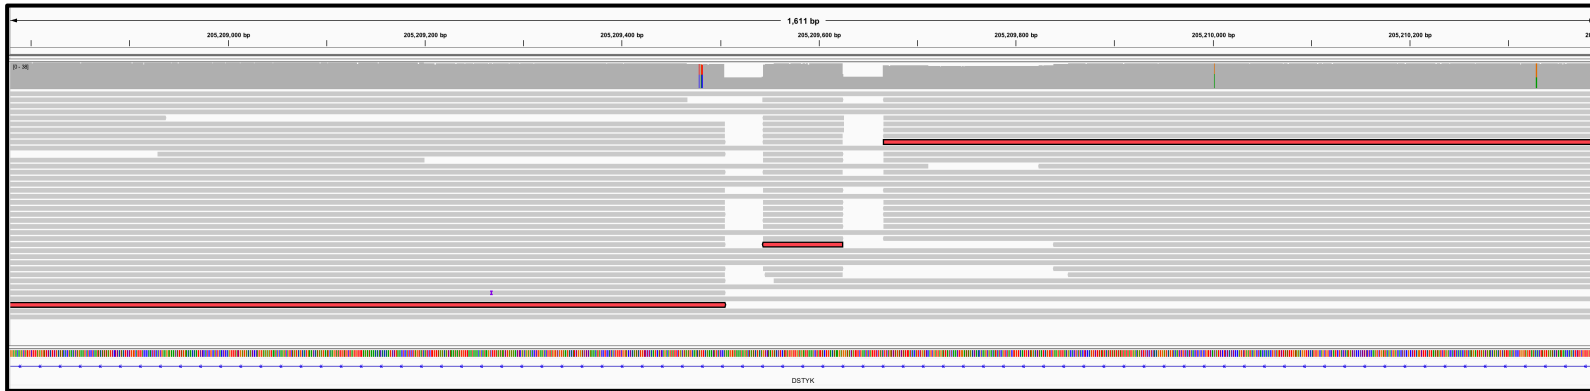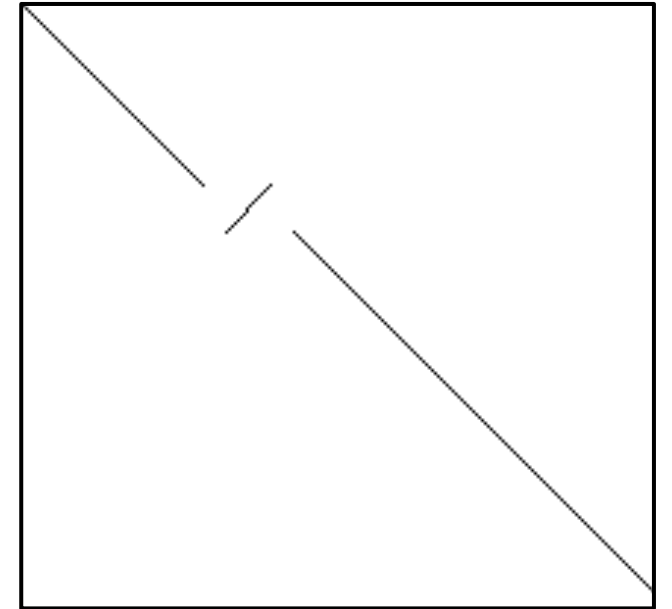

❖ chr4-145693889-145694397

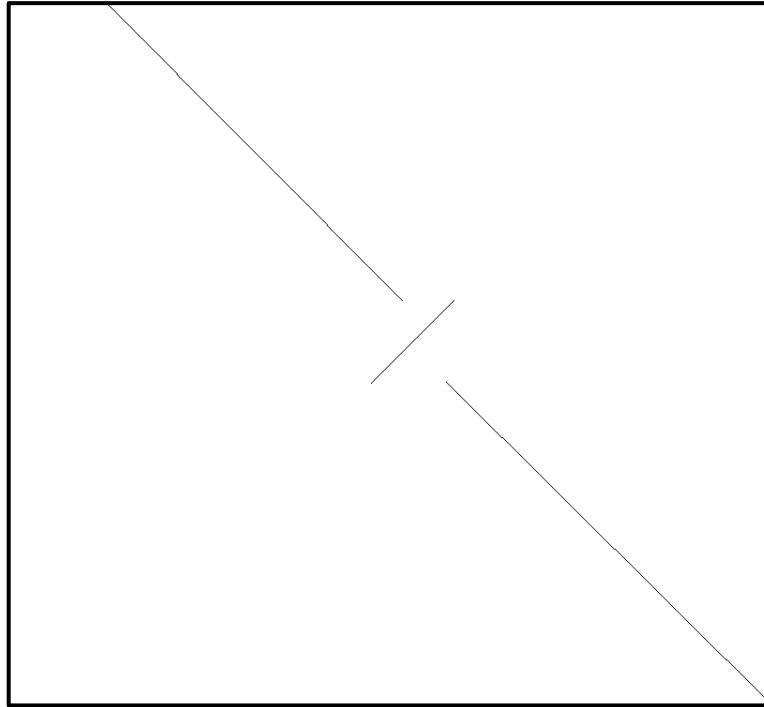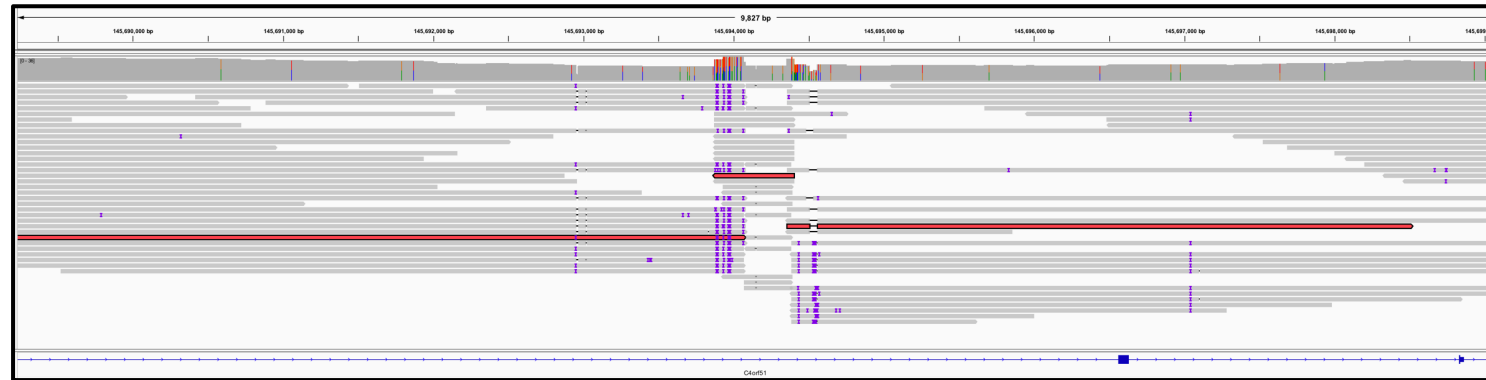

Supplementary File 2

# GraphID-49

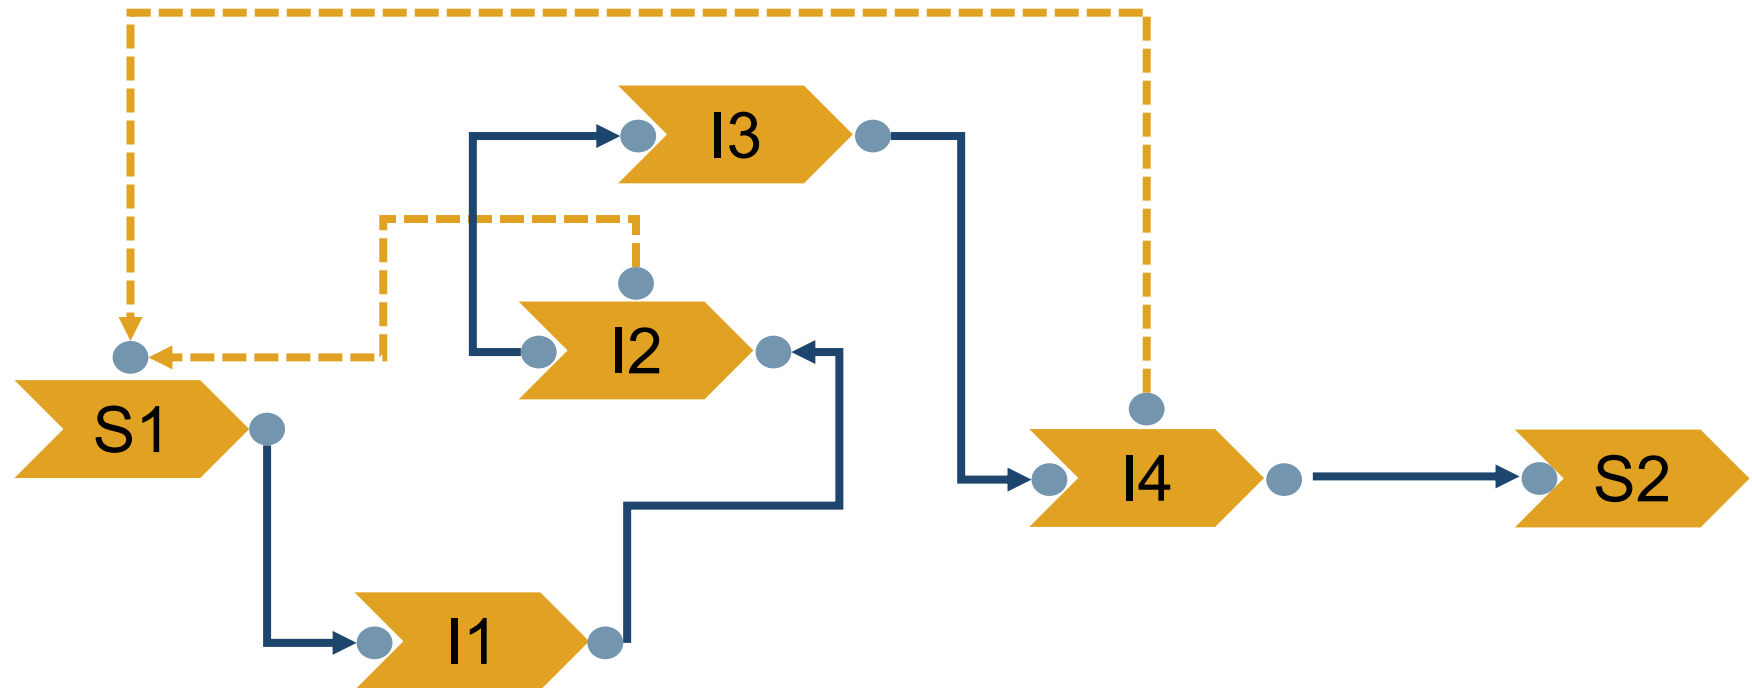

Nodes=S:2,I:4,D:2

❖ chr11-59277816-59282714

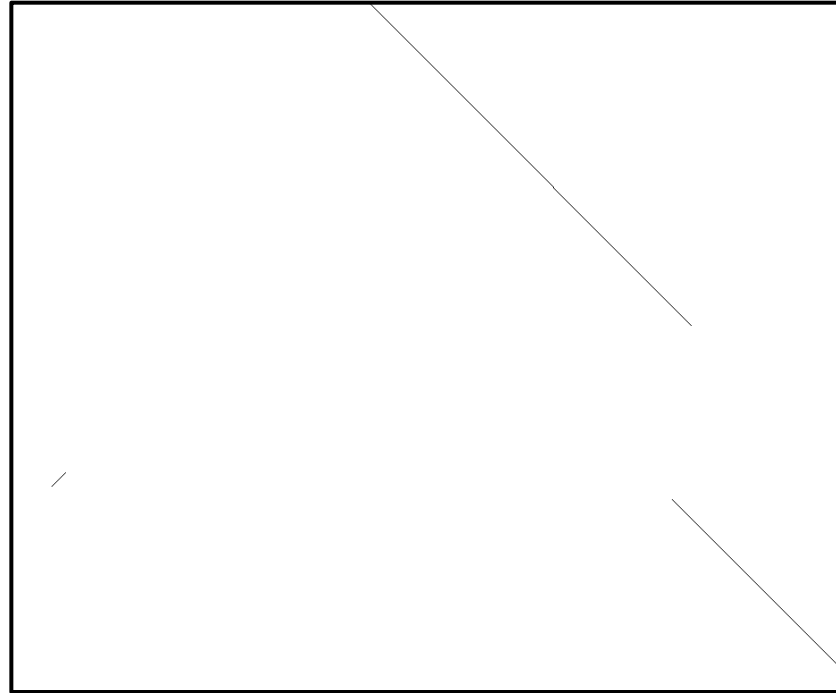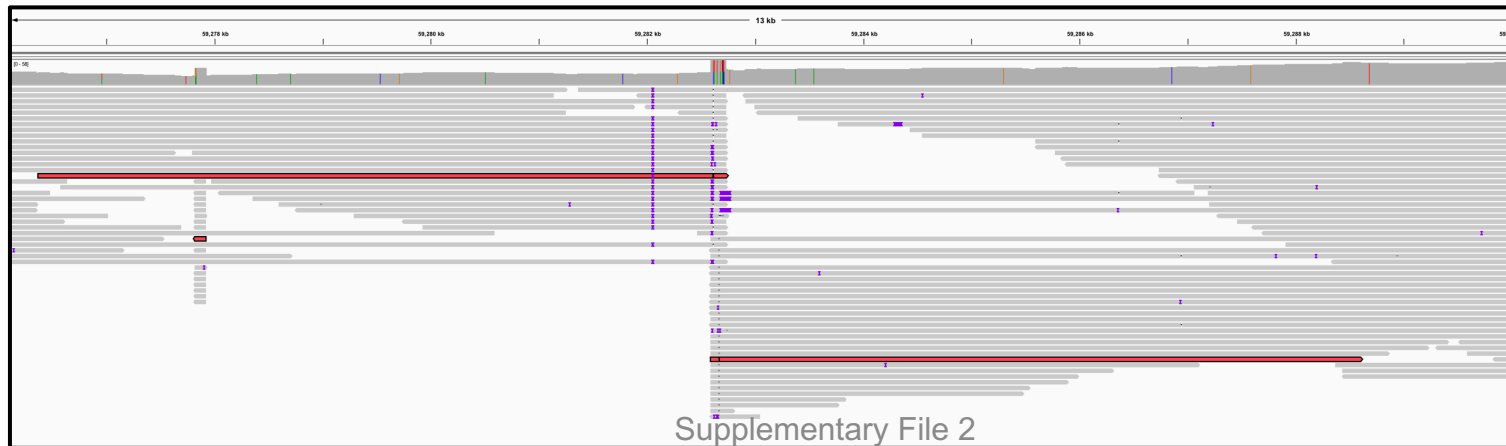

# GraphID-47

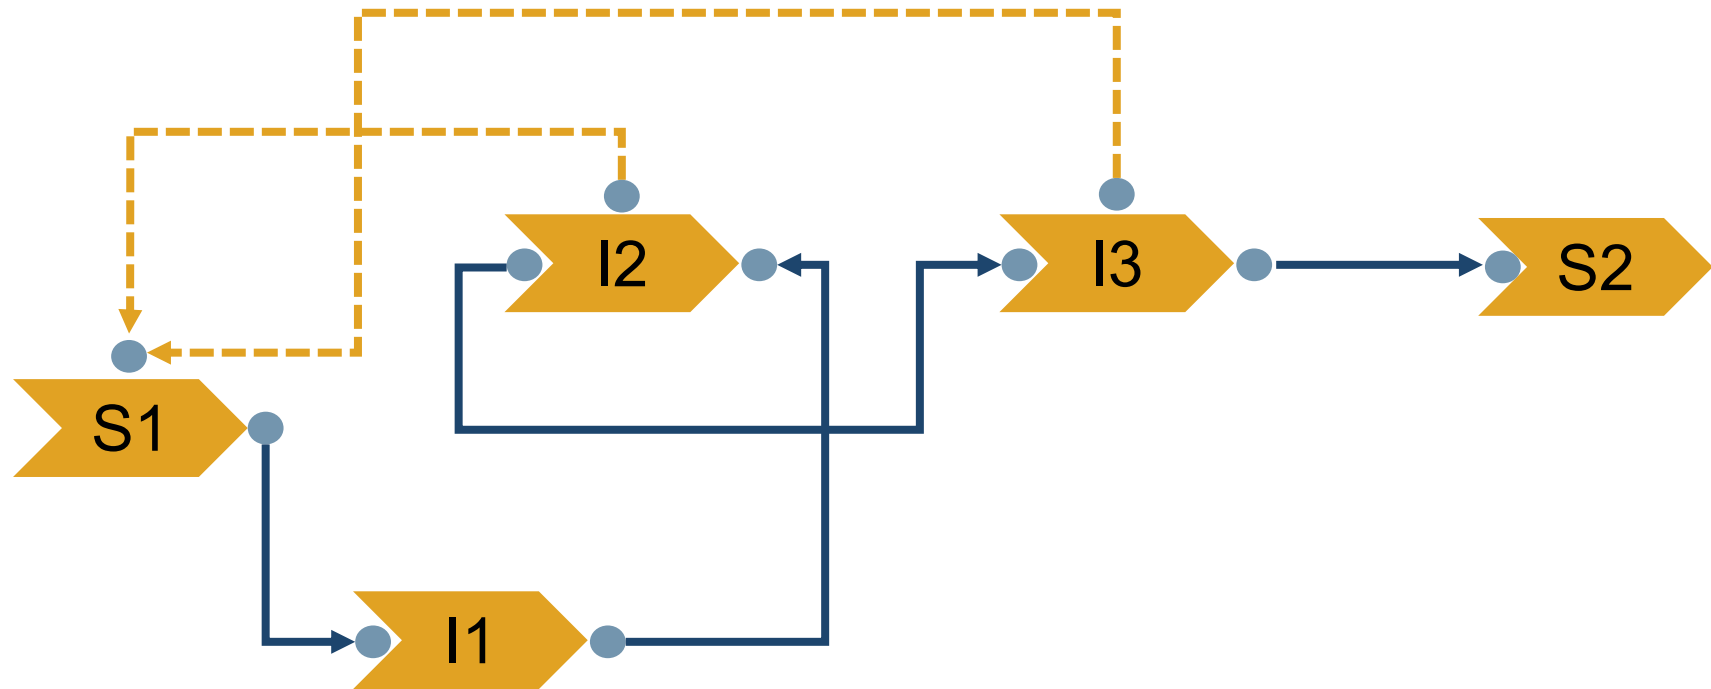

Nodes=S:2,I:2,D:1

Supplementary File 2

❖ chr5-155906888-155907080

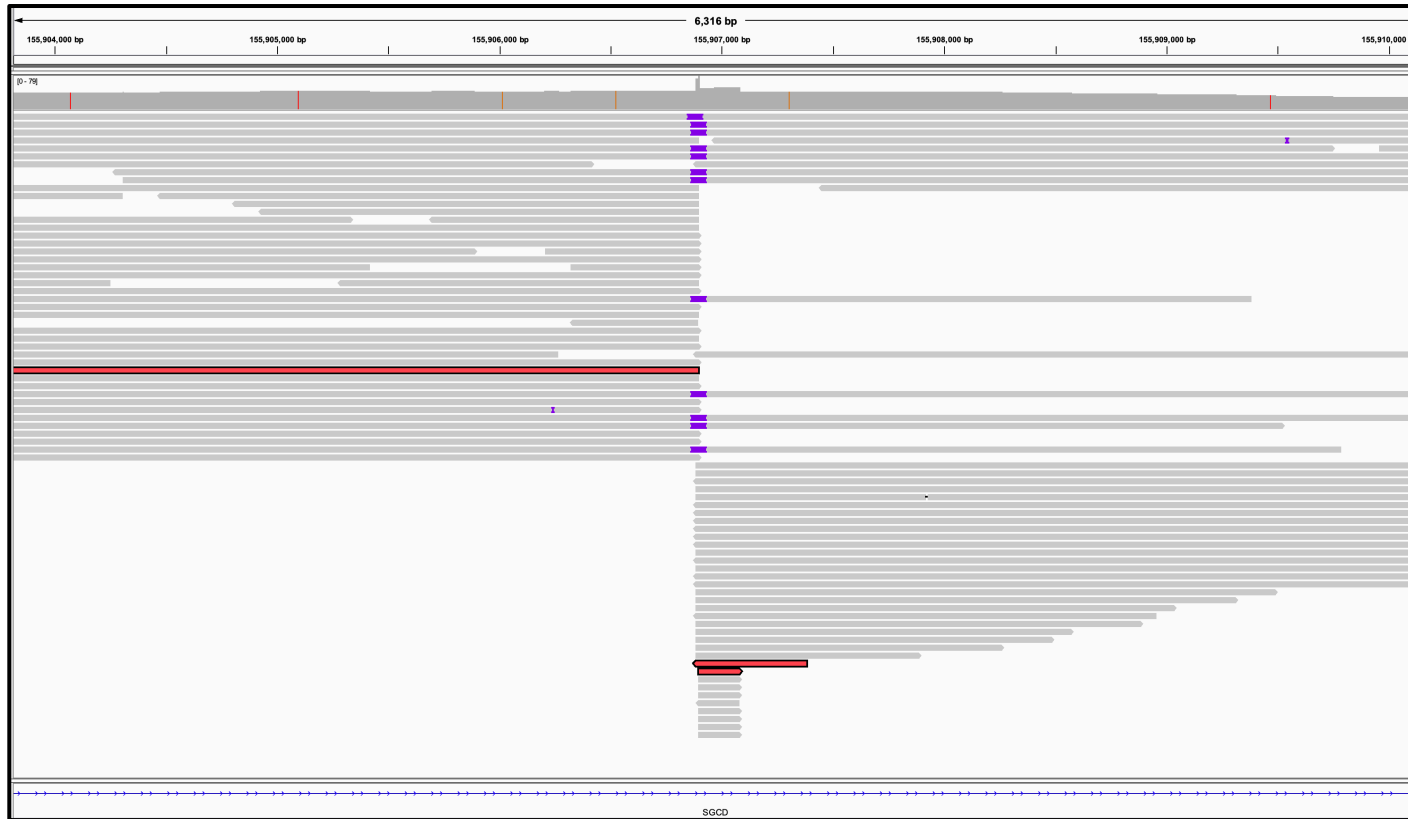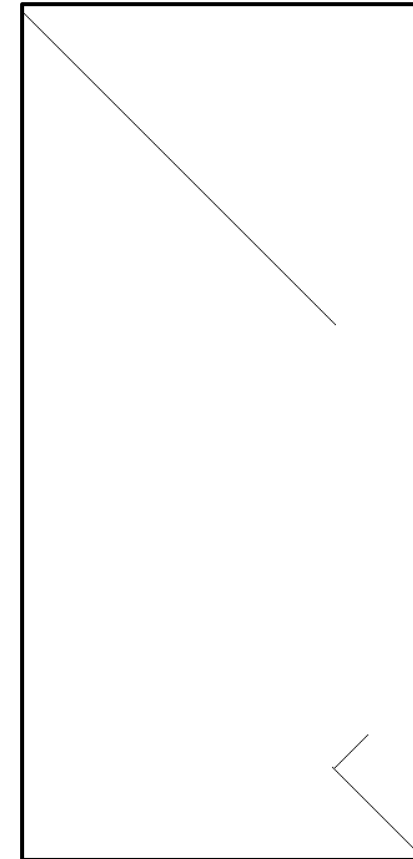

❖ chr12-25106528-25107673

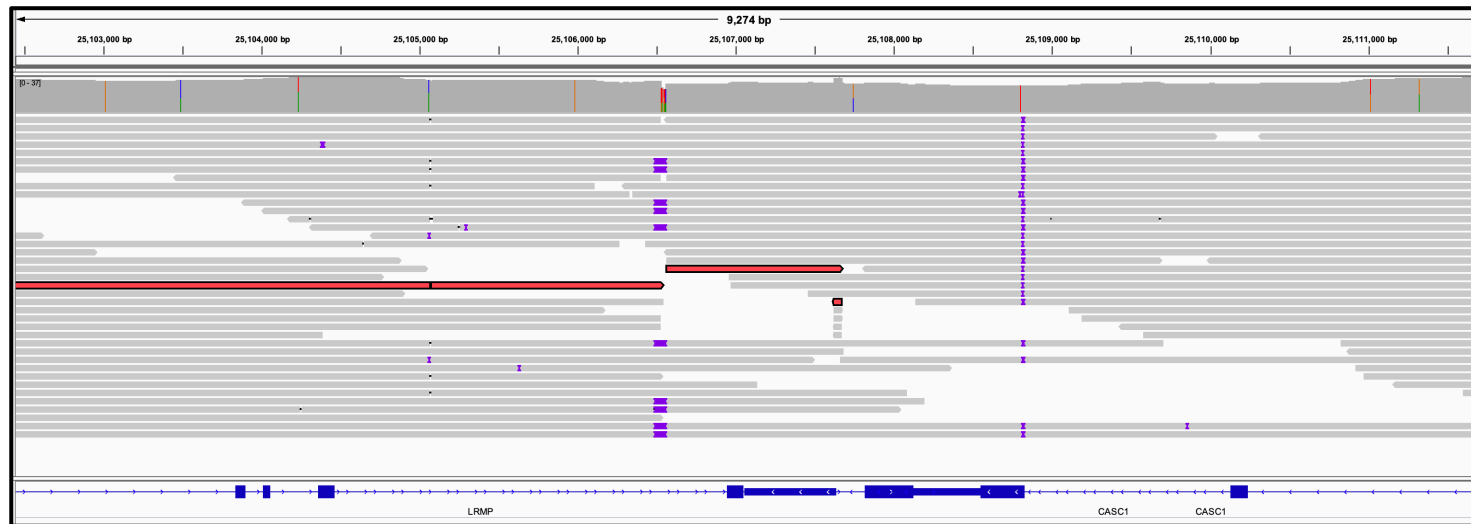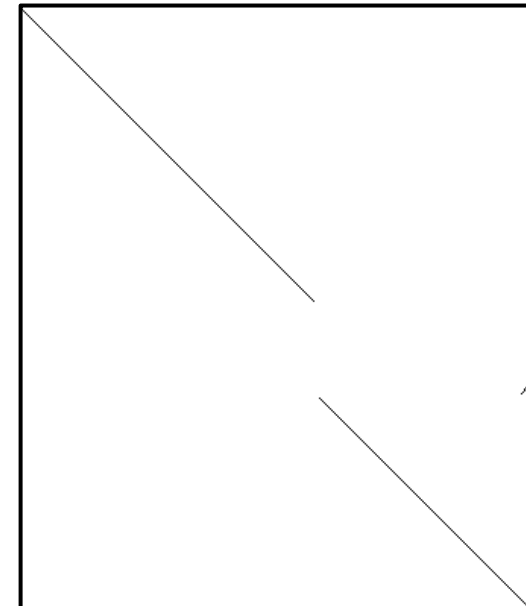

# GraphID-40

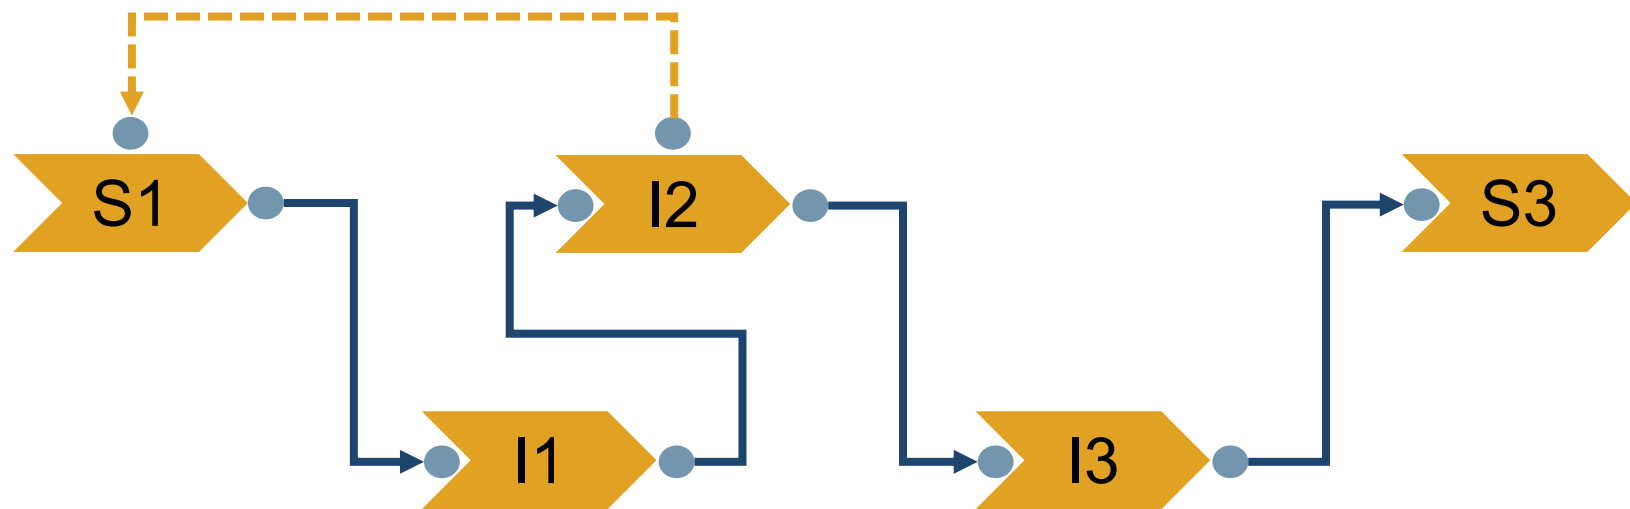

Nodes=S:2,I:3,D:1



❖ chr4-92646210-92649022

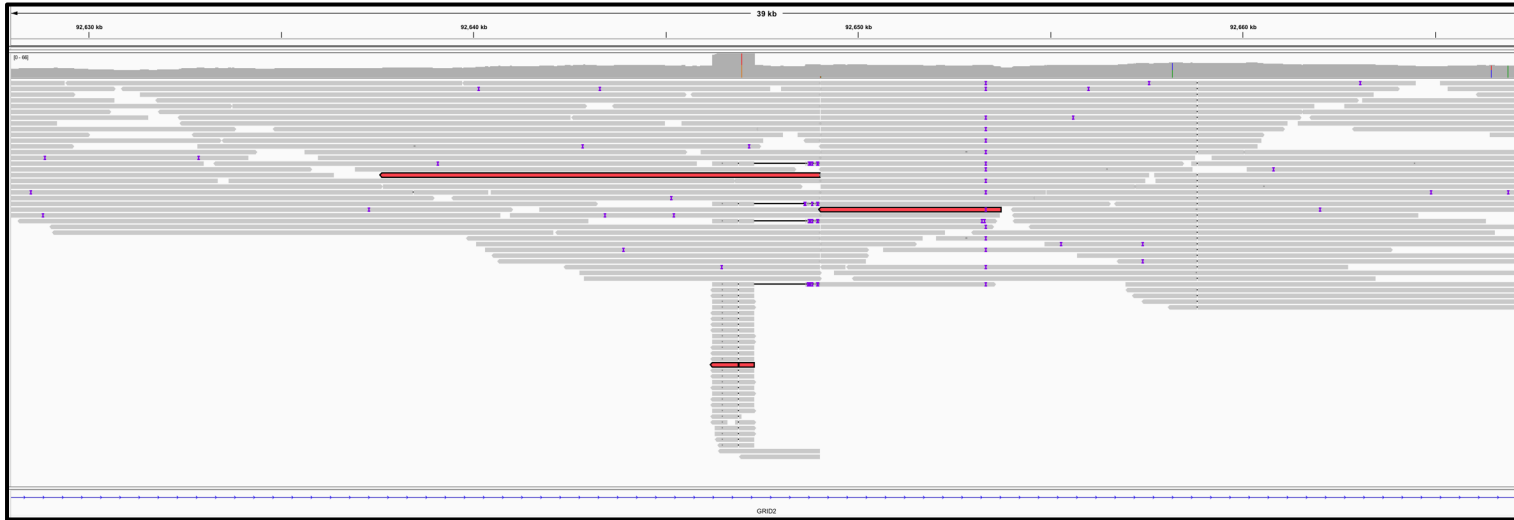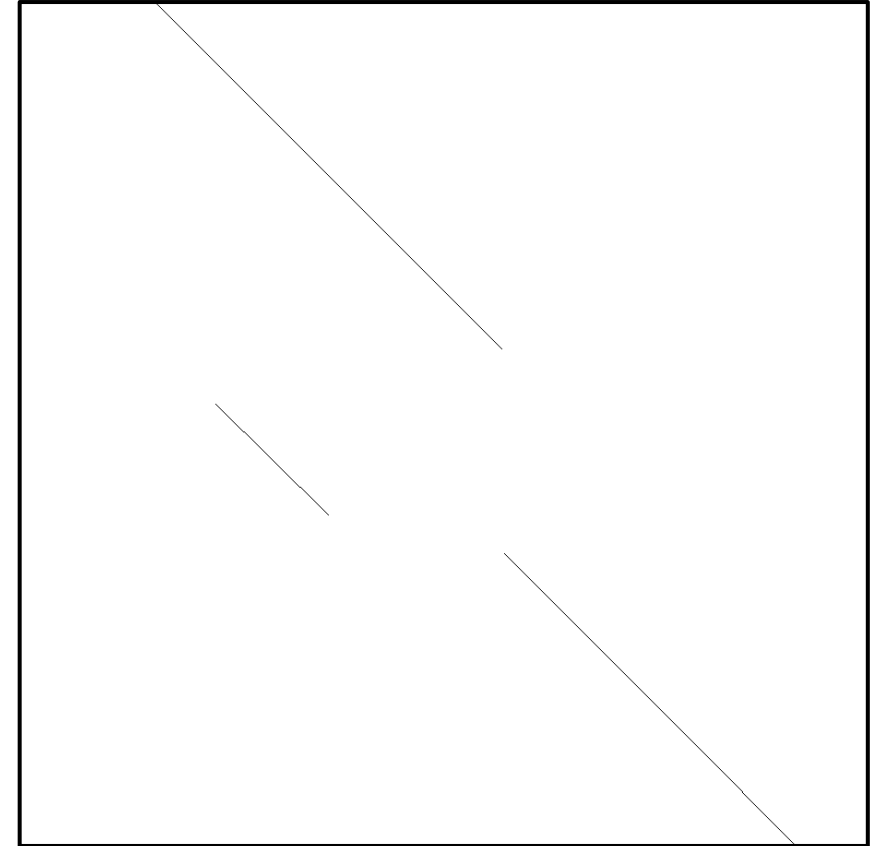

❖ chr5-51925593-51927635

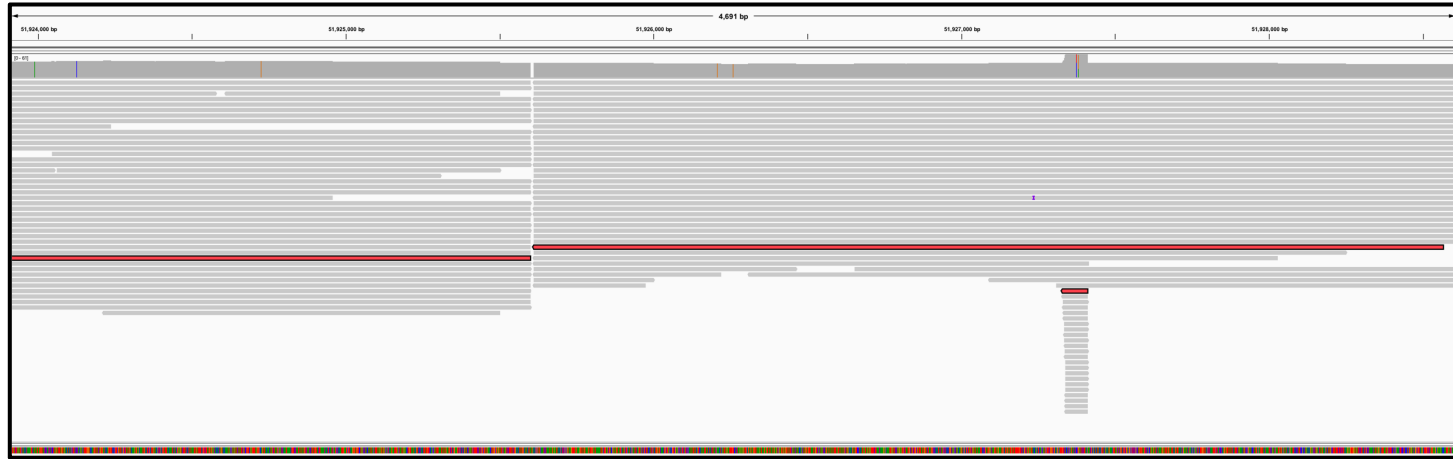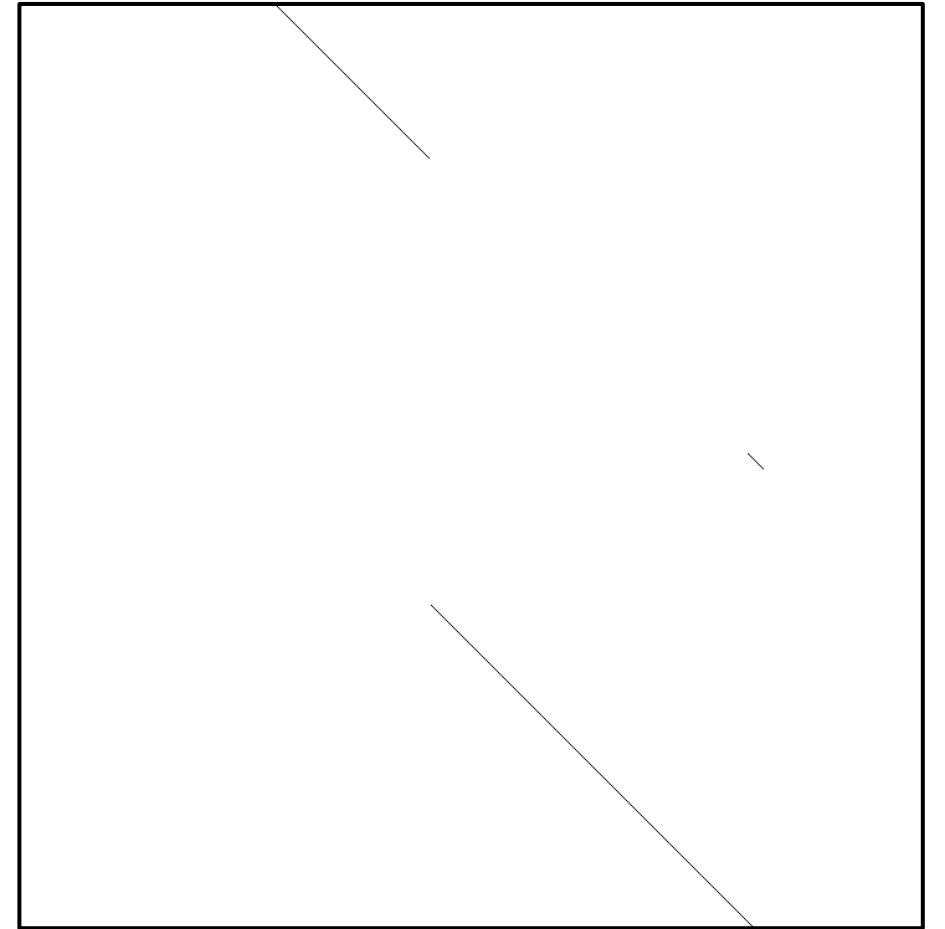

# GraphID-20

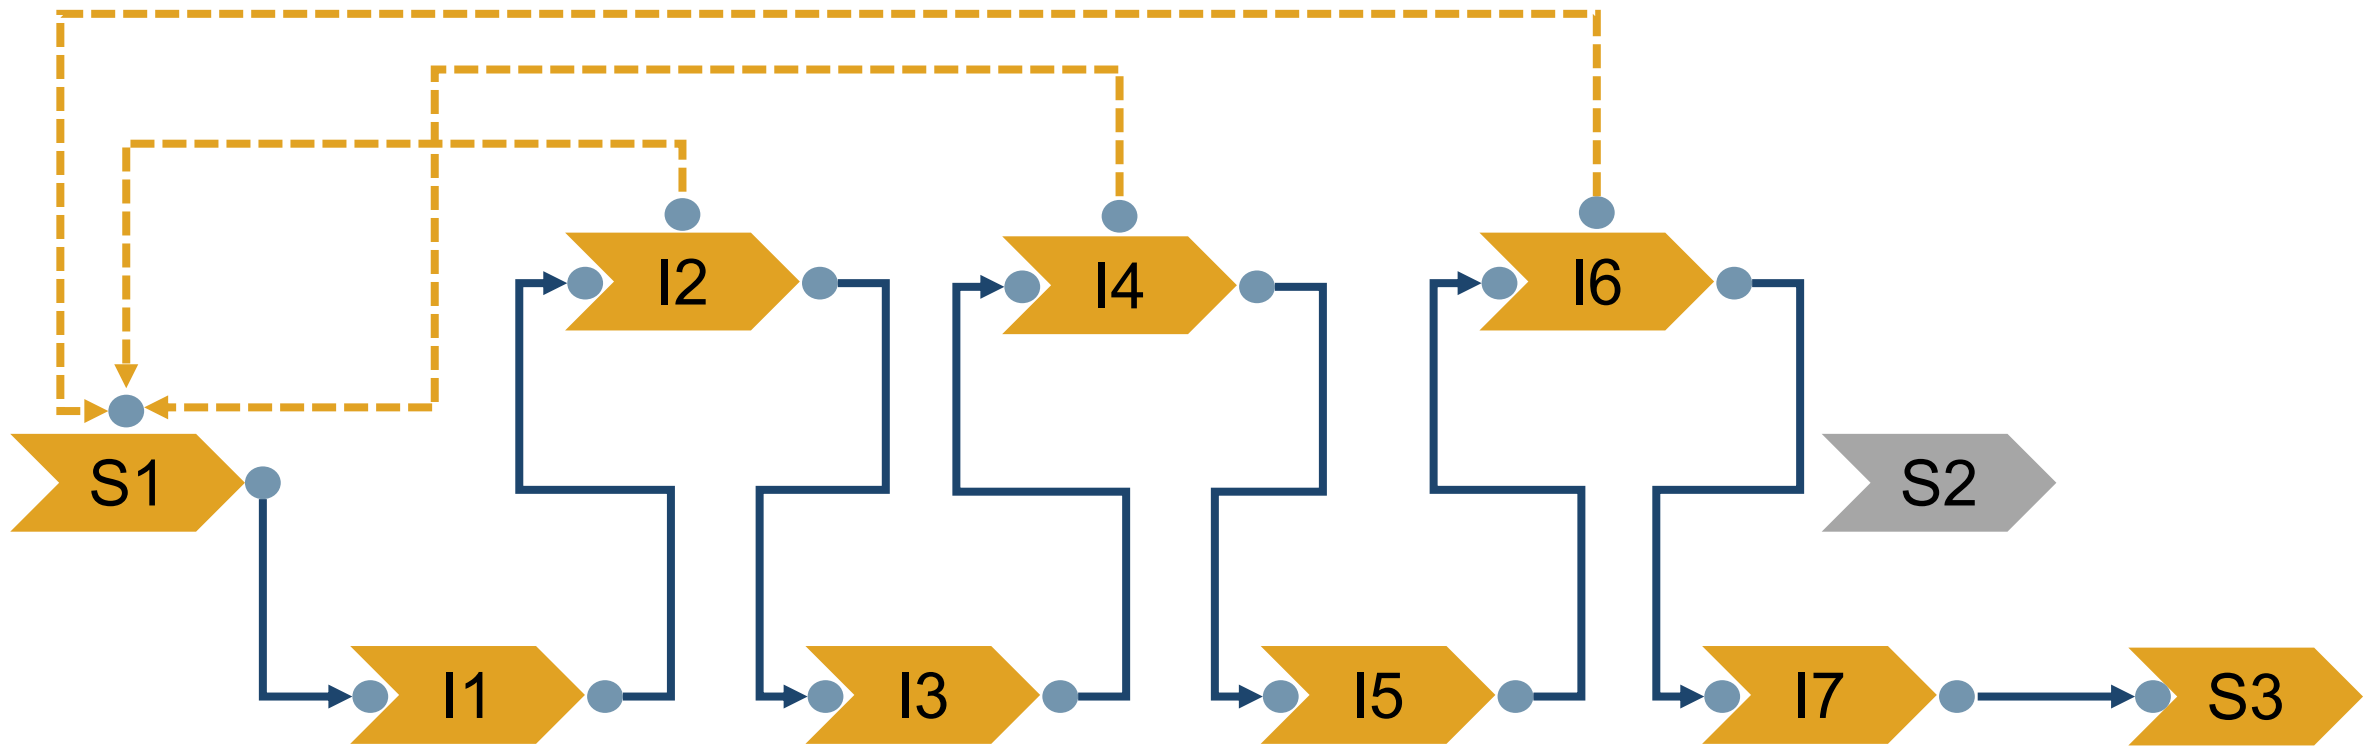

Nodes=S:3,I:7,D:3

Supplementary File 2

❖ chr1-246817940-246819350

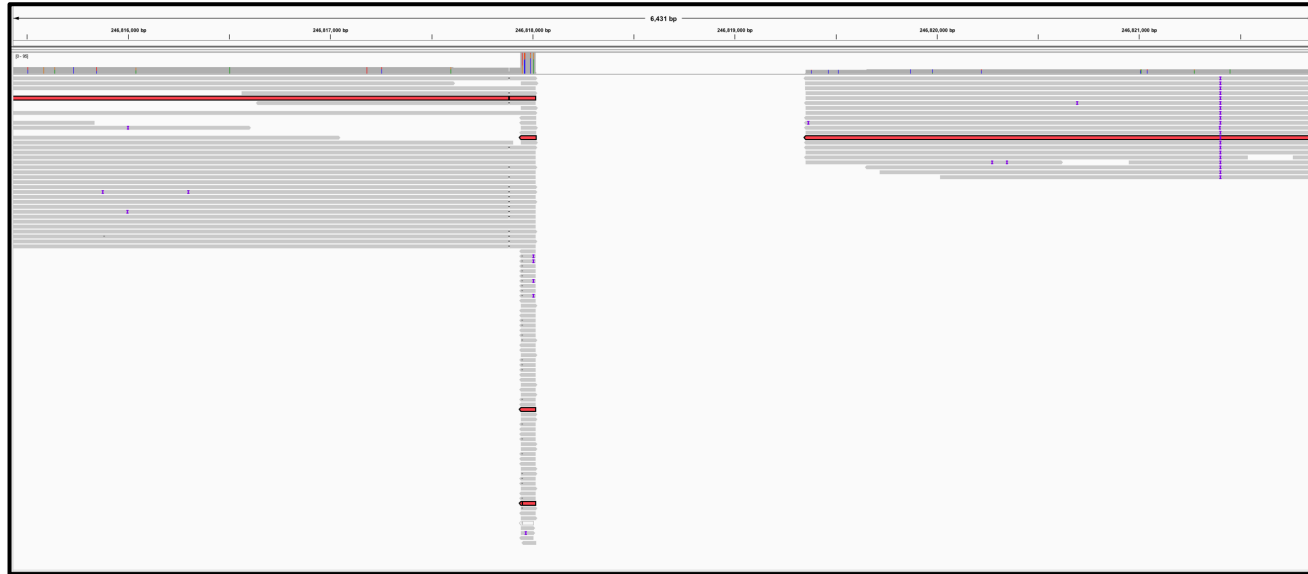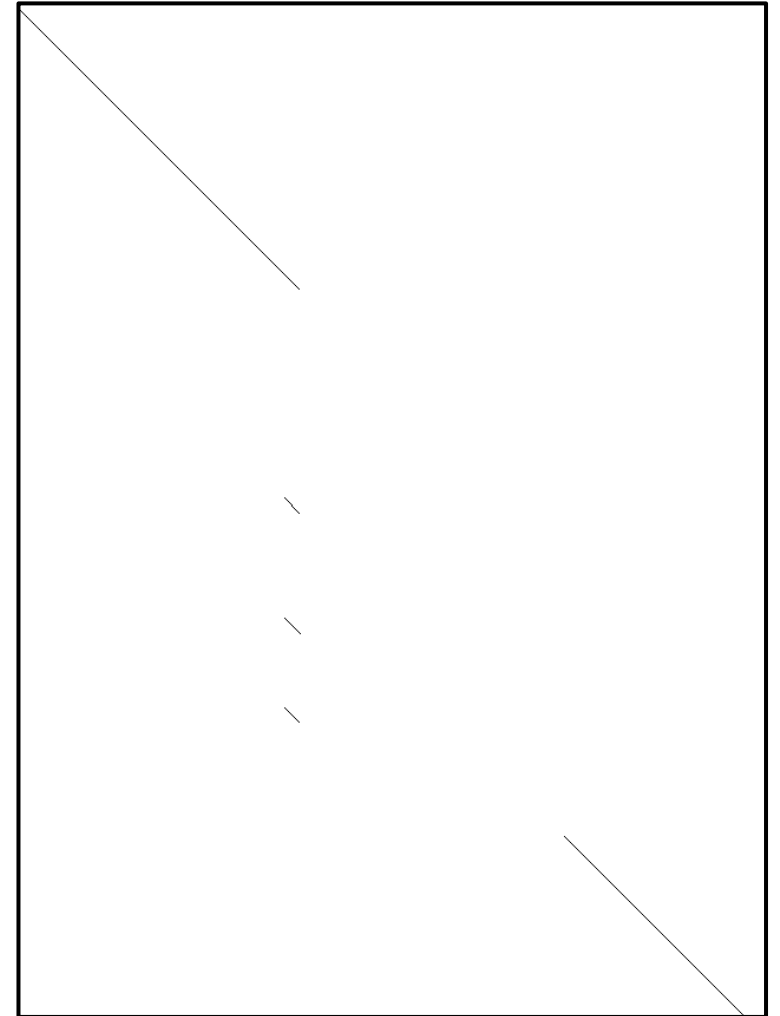

# GraphID-55

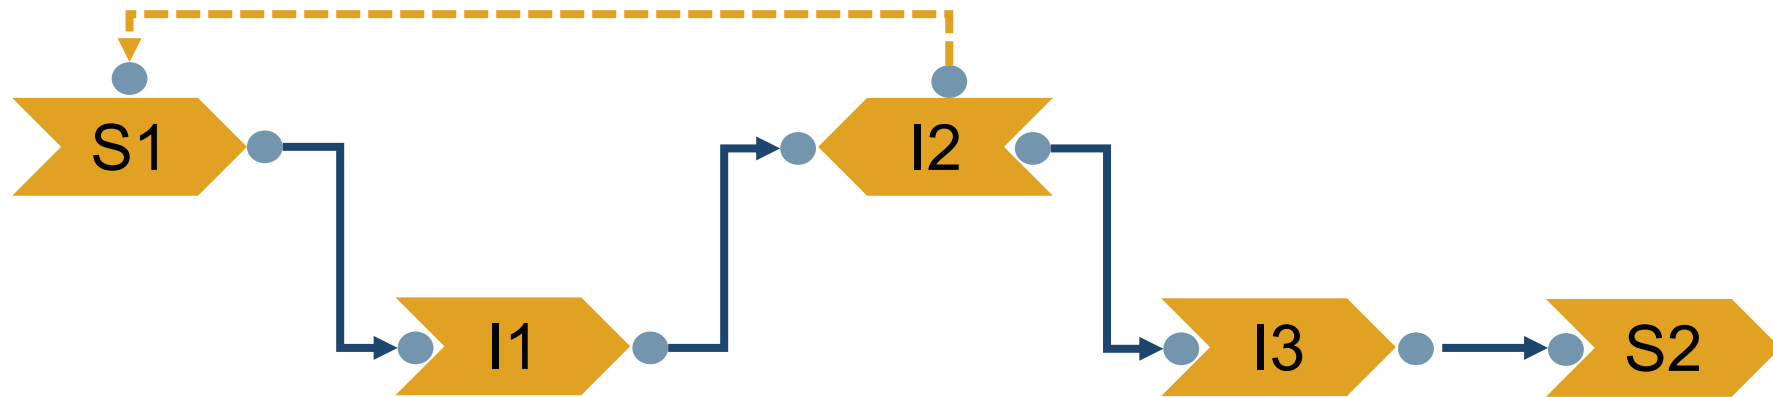

Nodes=S:2,I:3,D:1

❖ chr11-126632686-126632772

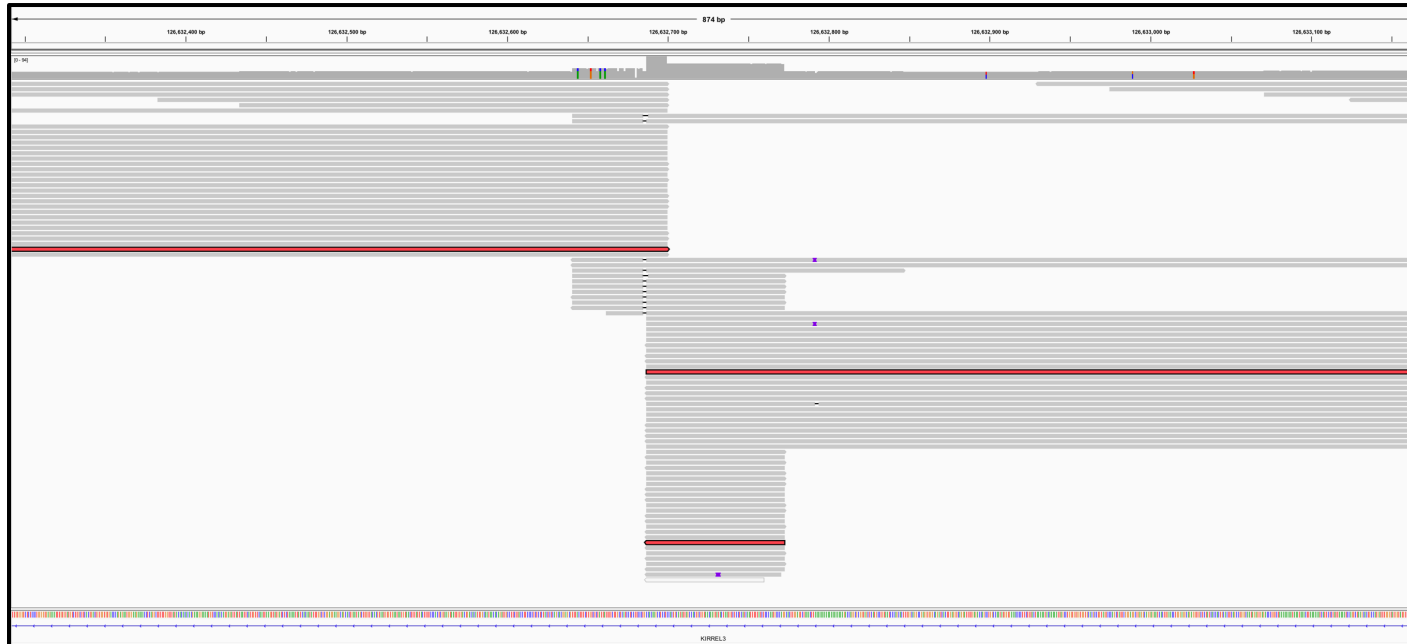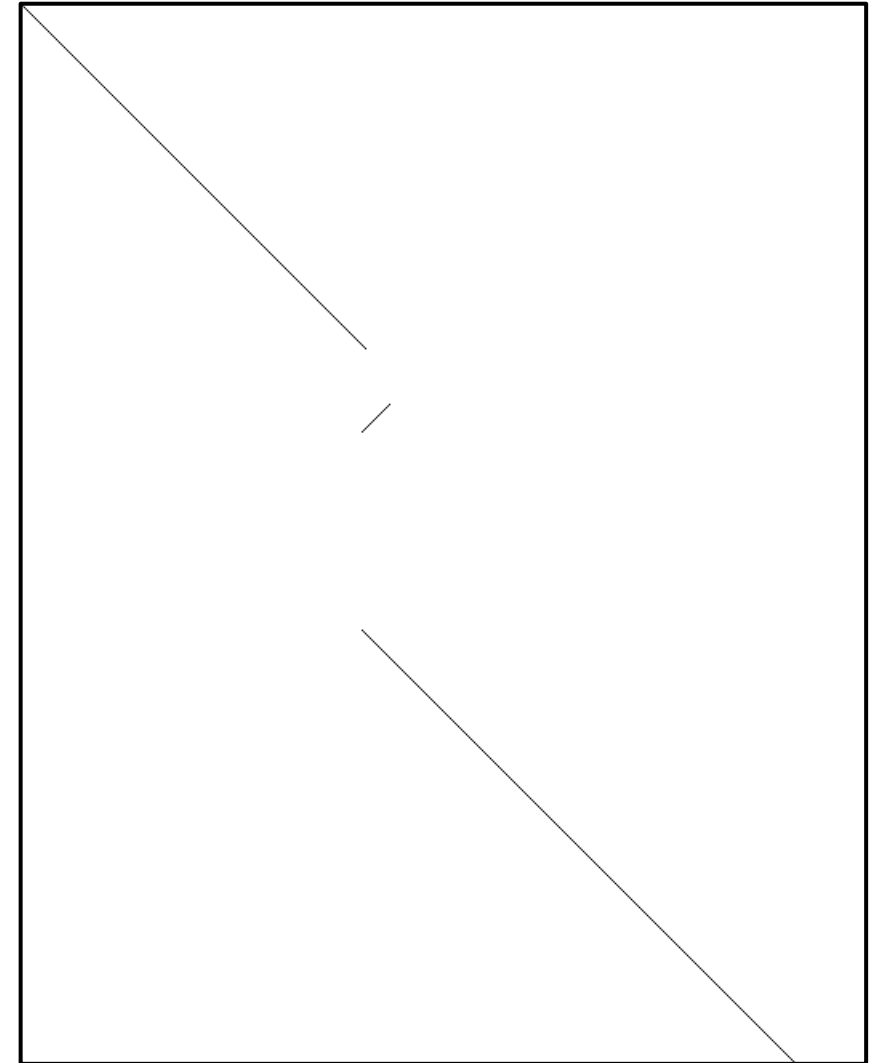

# GraphID-54

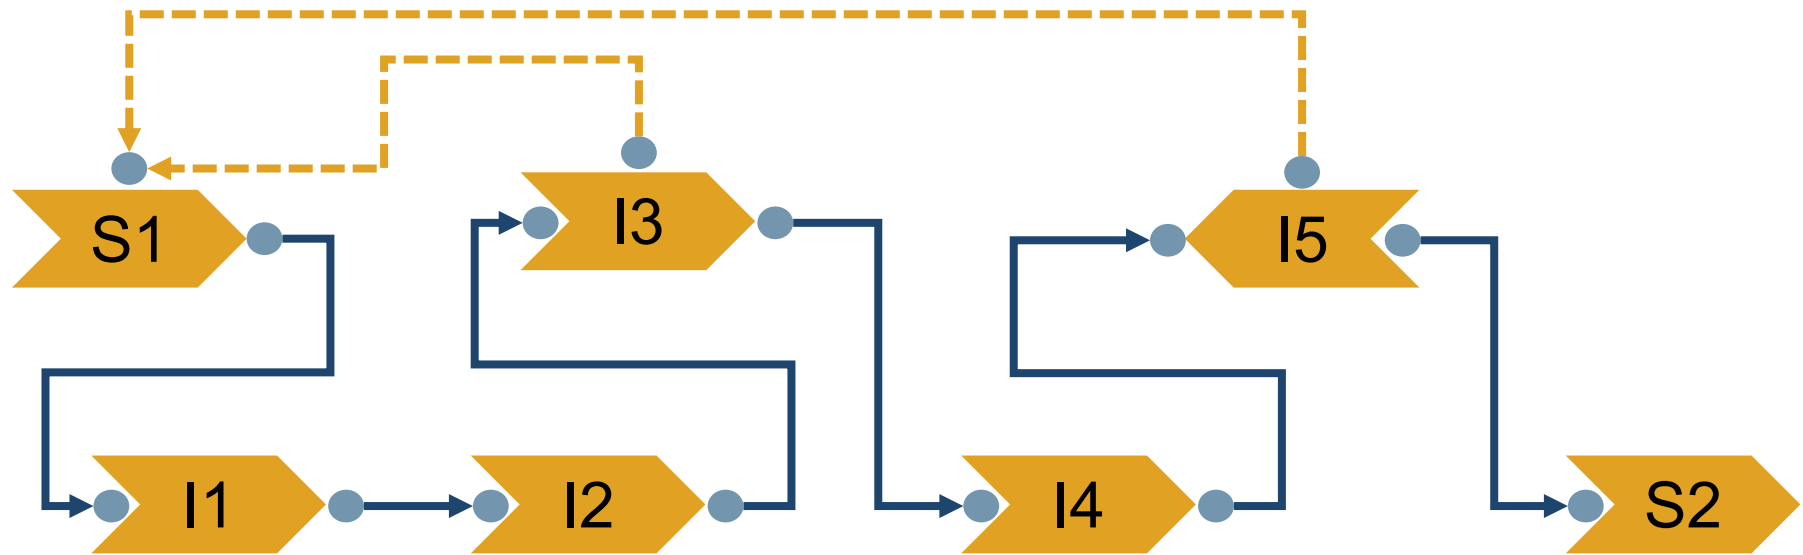

Nodes=S:2,I:5,D:2

❖ chr11-99819283-99820576

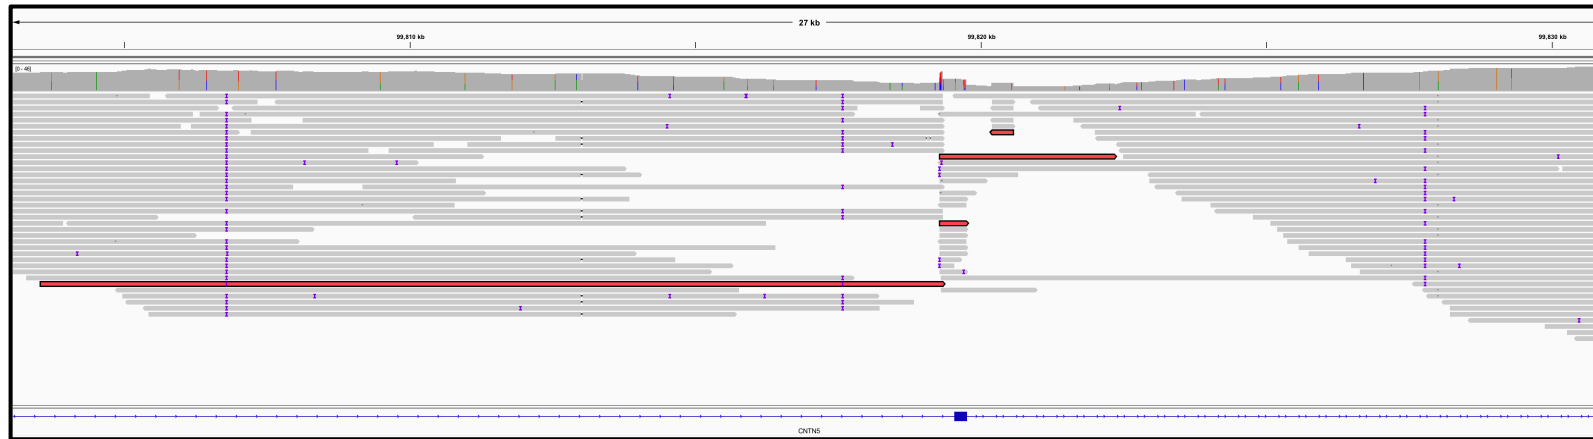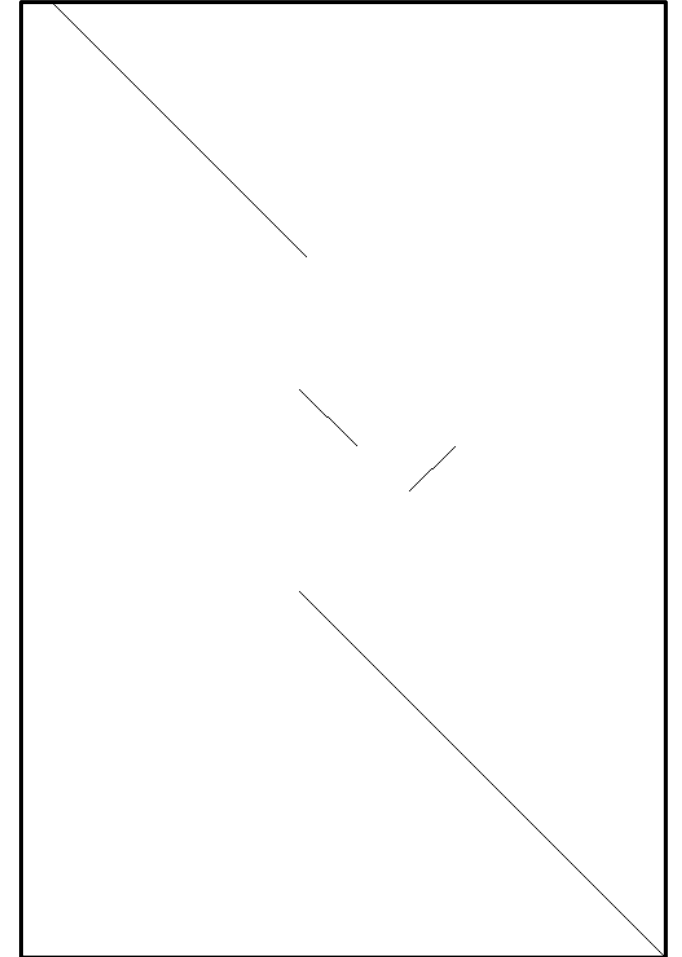



# GraphID-26

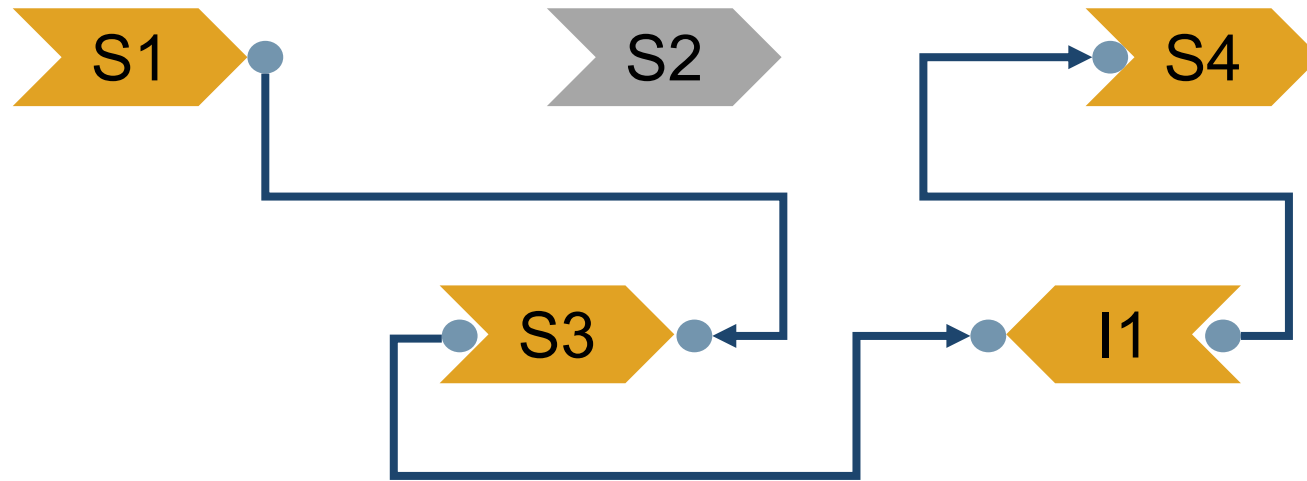

Nodes=S:4,I:1

❖ chr2-195114663-195119917

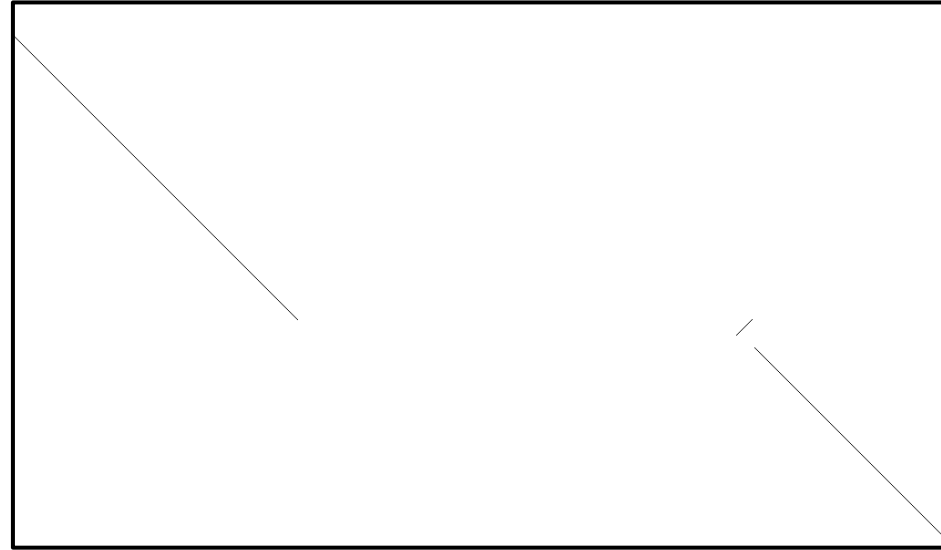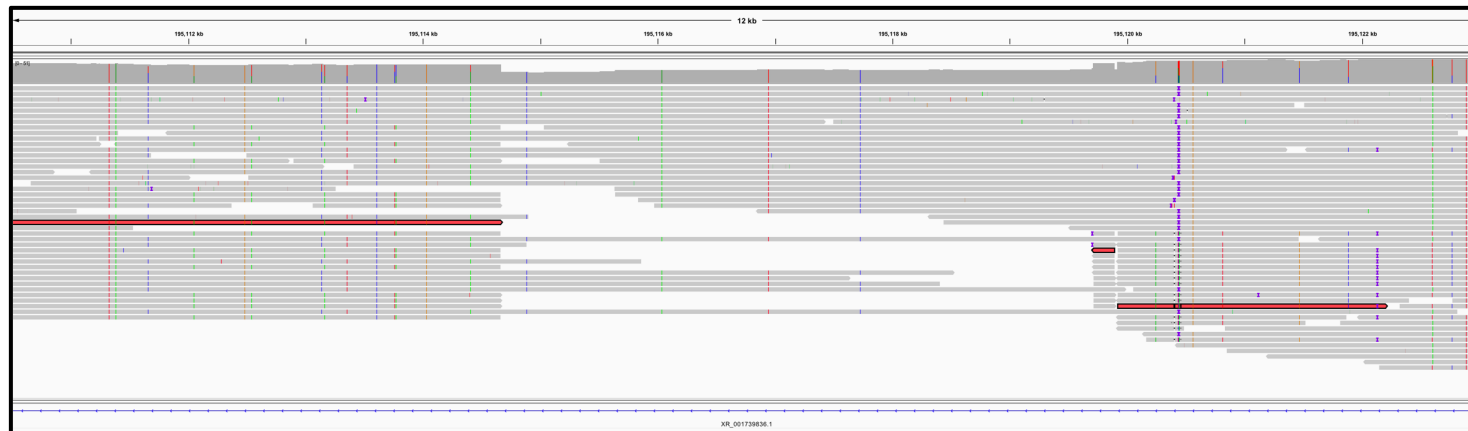

Supplementary File 2

# GraphID-35

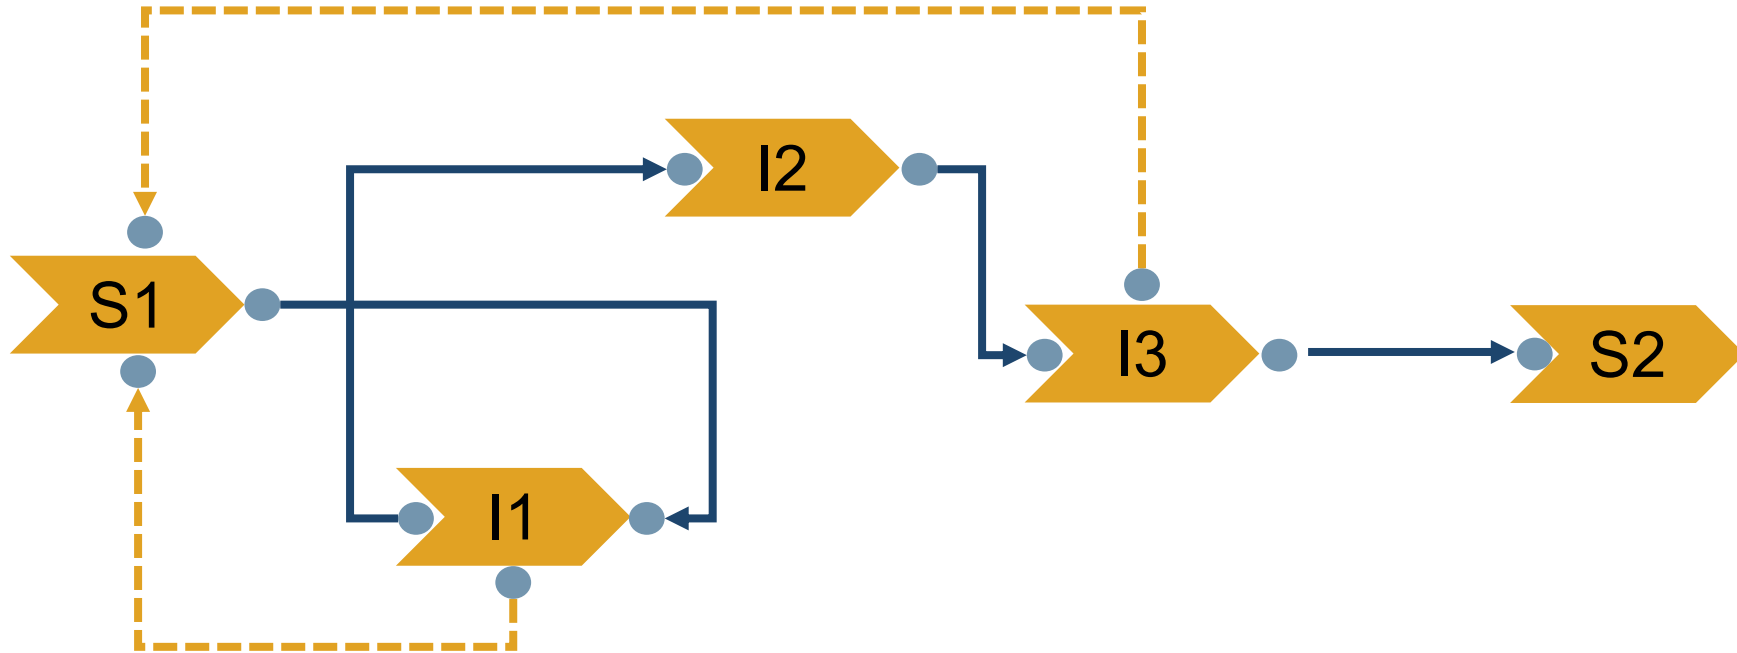

Nodes=S:2,I:3,D:2

Supplementary File 2

❖ chr8-47980291-47981120

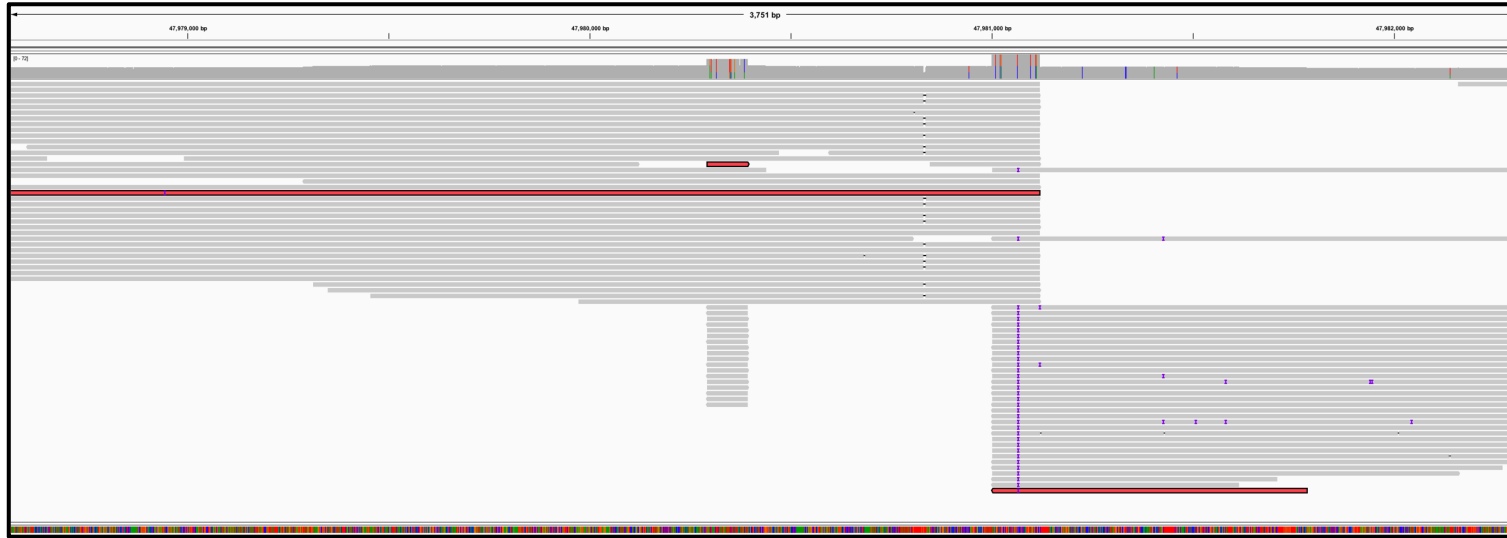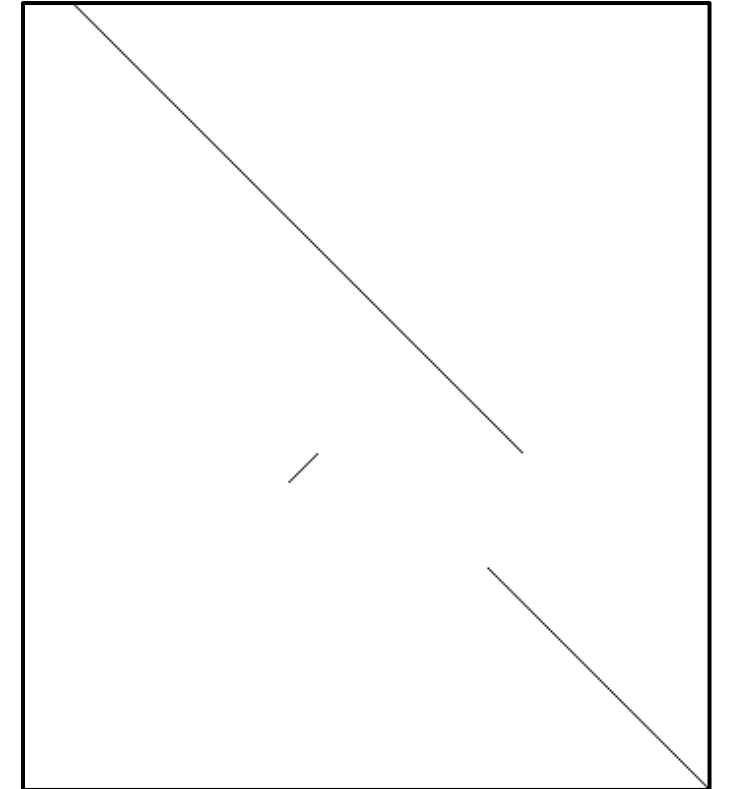

# GraphID-51

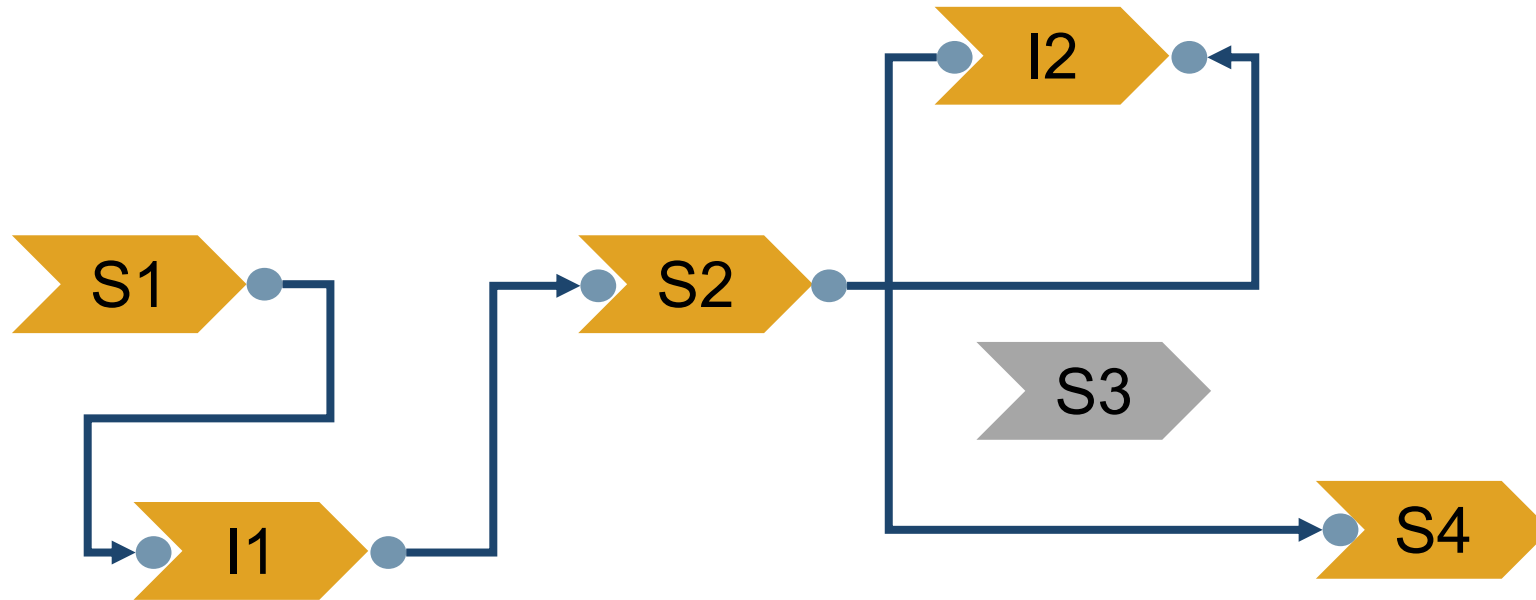

Nodes=S:4,I:2

❖ **chr9-74283222-74283473**

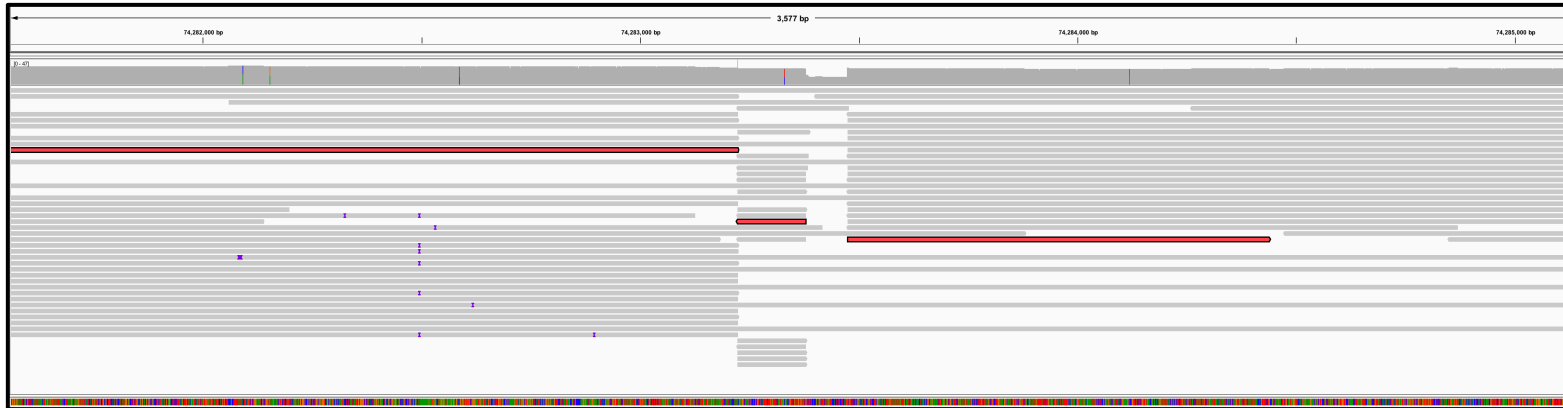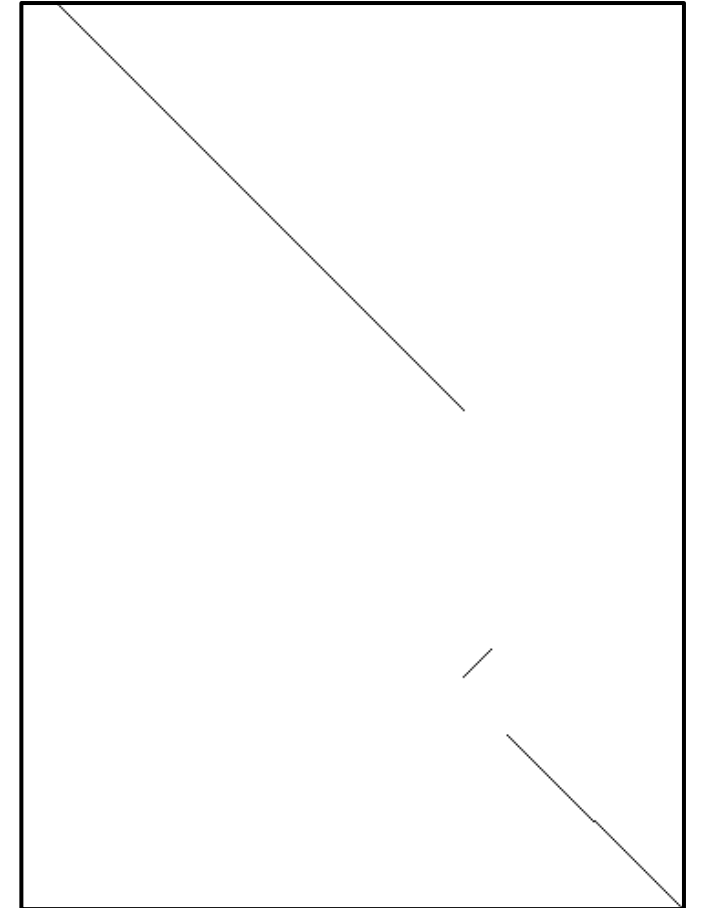

Supplement: NIHMS1867530-supplement-Supplementary_File_2.pdf [file NIHMS1867530-supplement-Supplementary_File_2.pdf]
