# Supplementary material
Source: PubMed Central journal article supplement (PMC9985066)

# Supplementary File 5

## RNA-Seq analysis of one CSV at *CNTN5*

### Note:

- The IGV view is grouped by read-pair orientations.
- The region between two dashed blue lines contains *CNTN5* exon 4.
- The red arrow points to the green read-pairs supporting duplicated exon signature and detailed alignment information of supporting read-pairs.
- The read depth increases inside red box compare to read depth outside the red box.

# ❖ SRR14194206, Control\_Male\_Precuneus

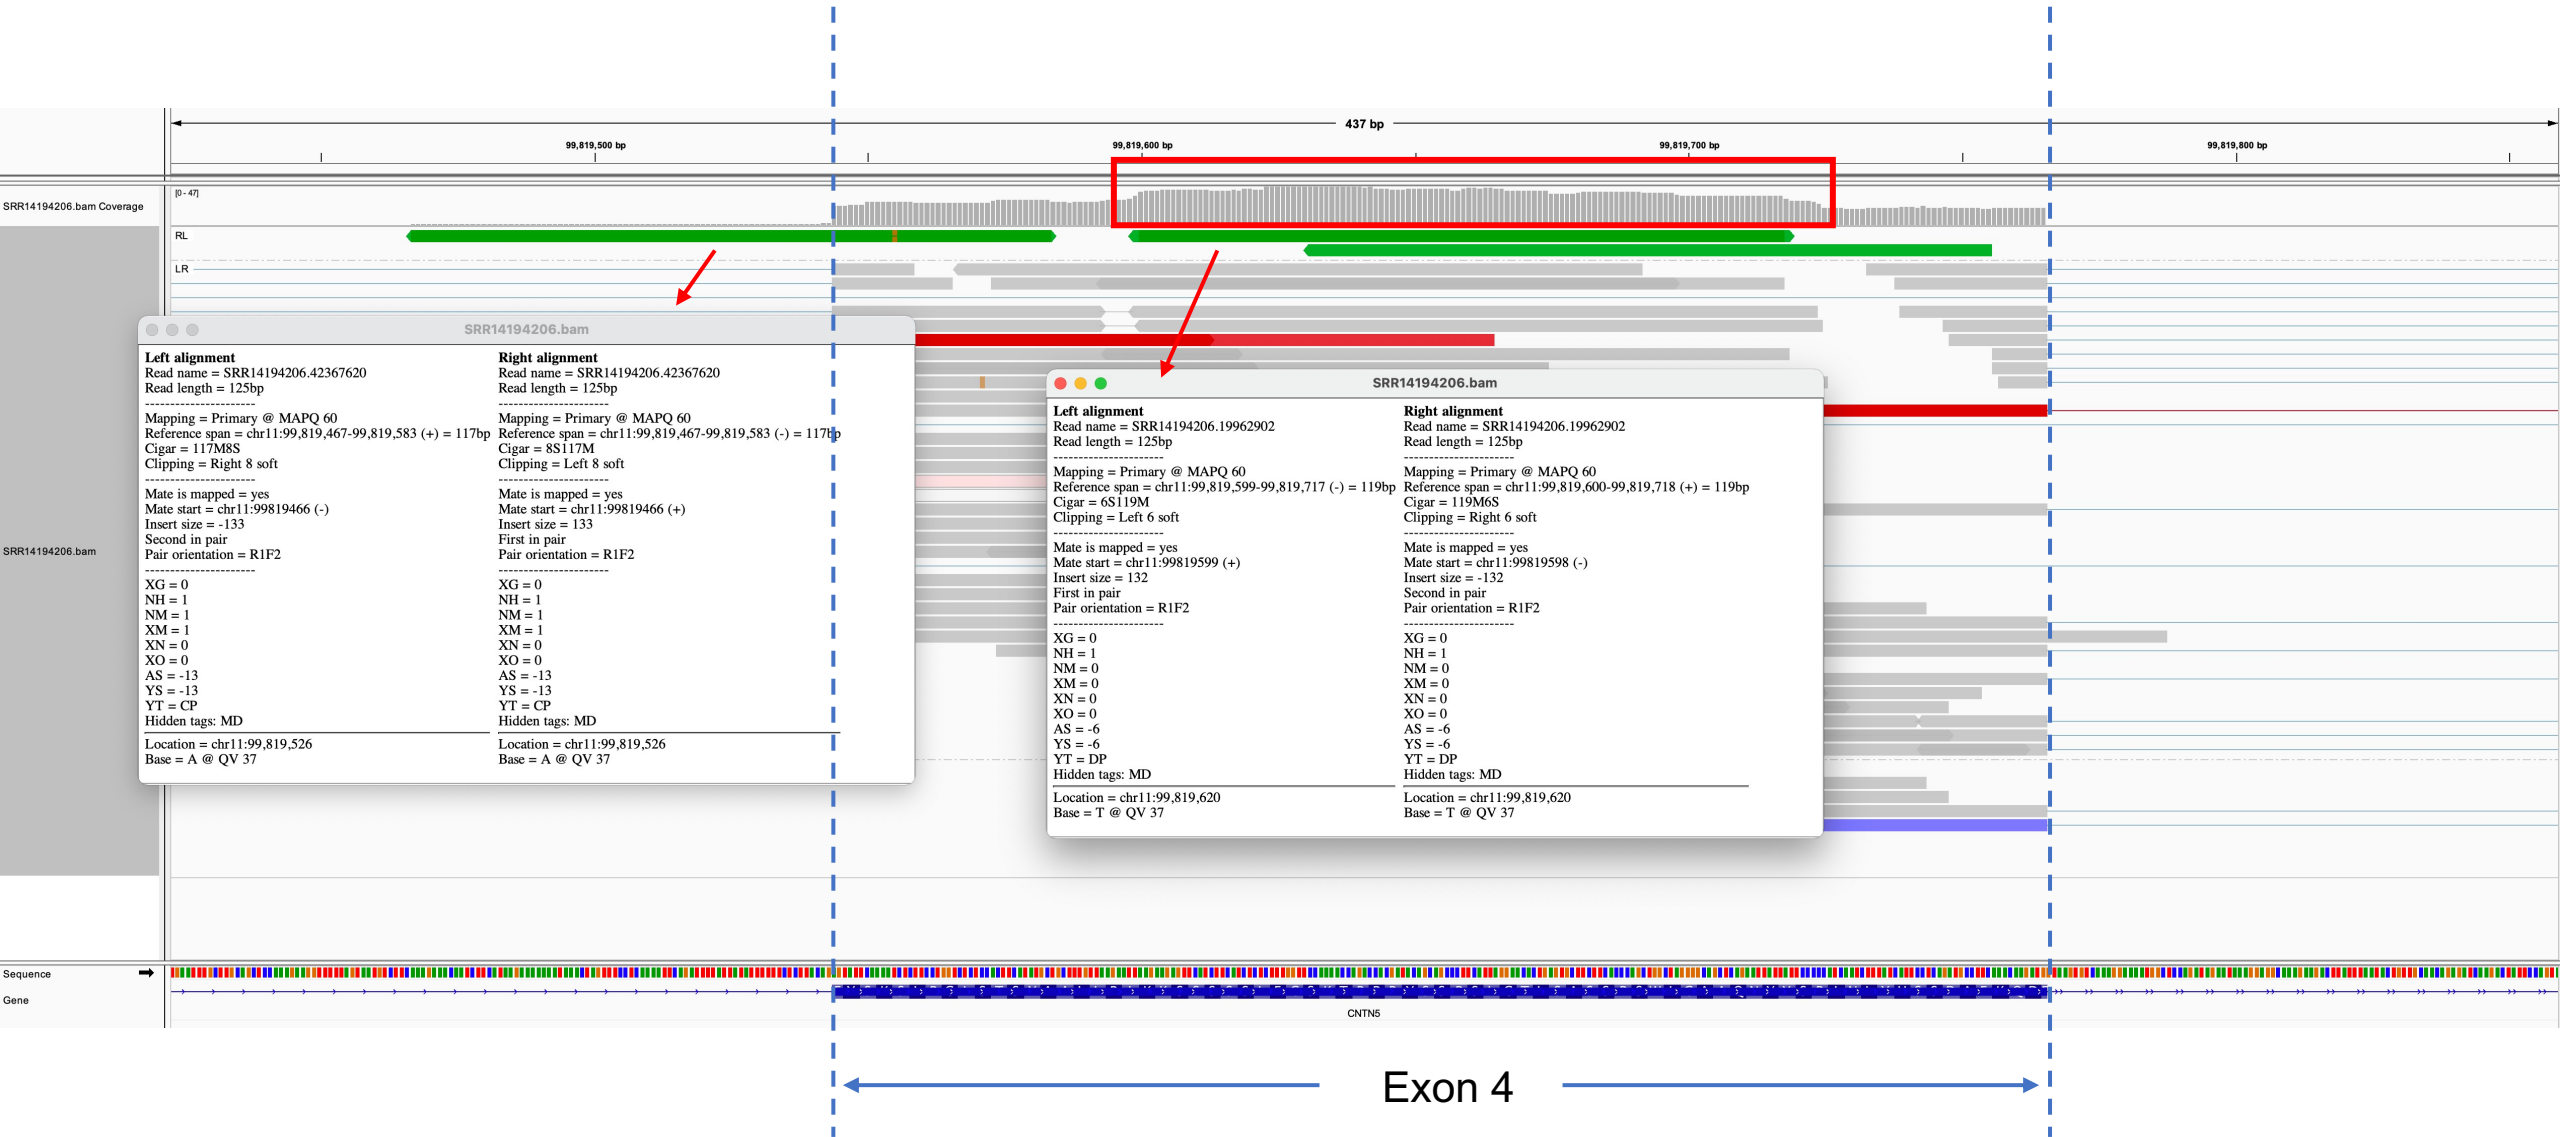

# ❖ SRR14194208, Control\_Female\_Precuneus

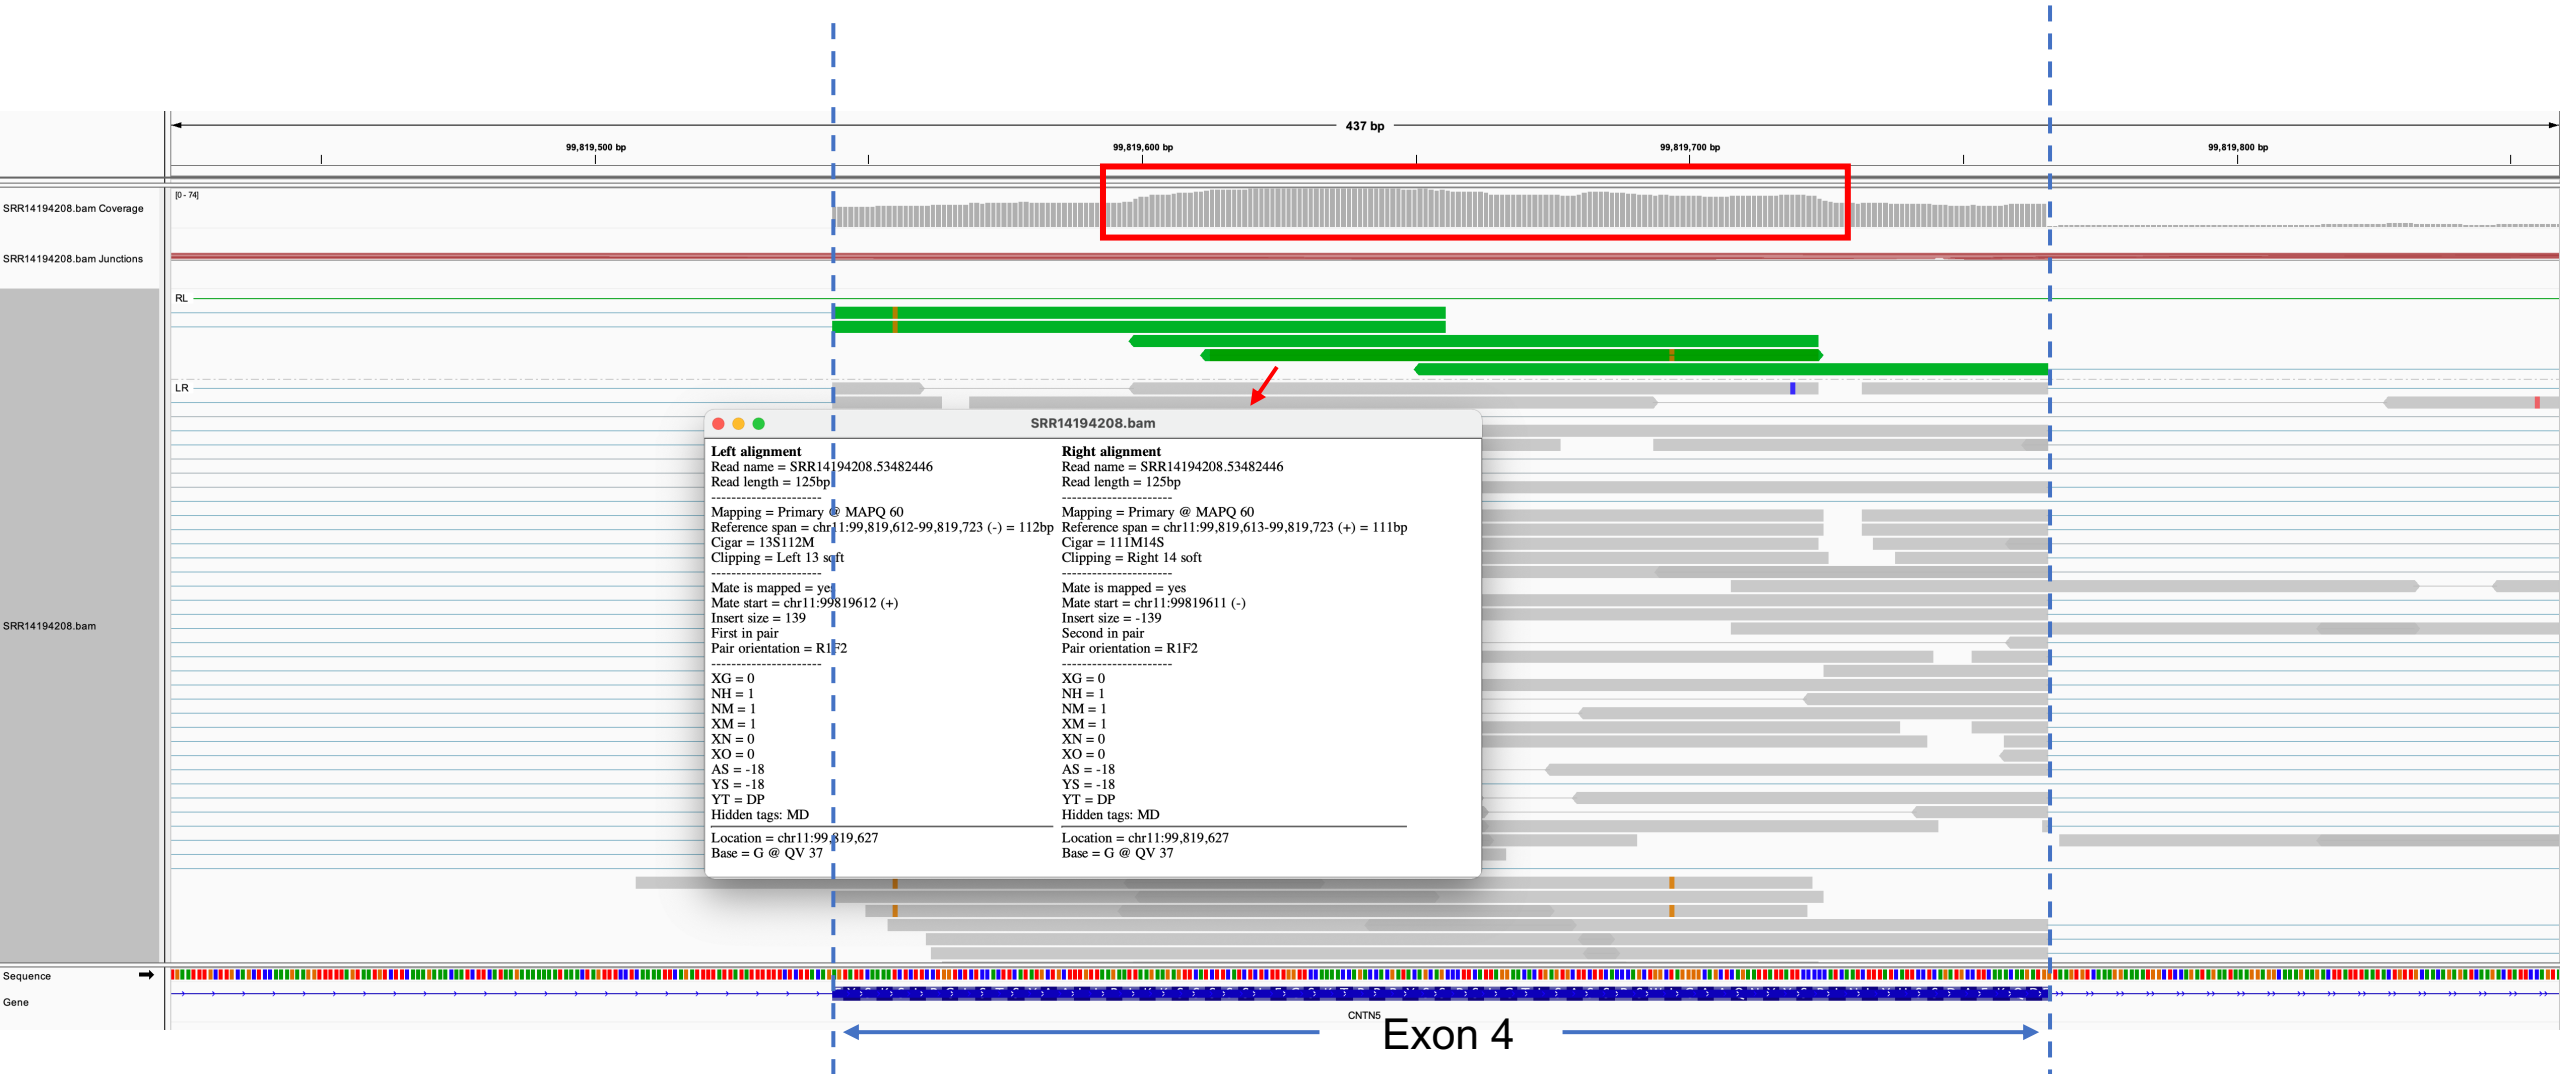

# ❖ SRR14194213, Alzheimer\_Disease\_Female\_Precuneus

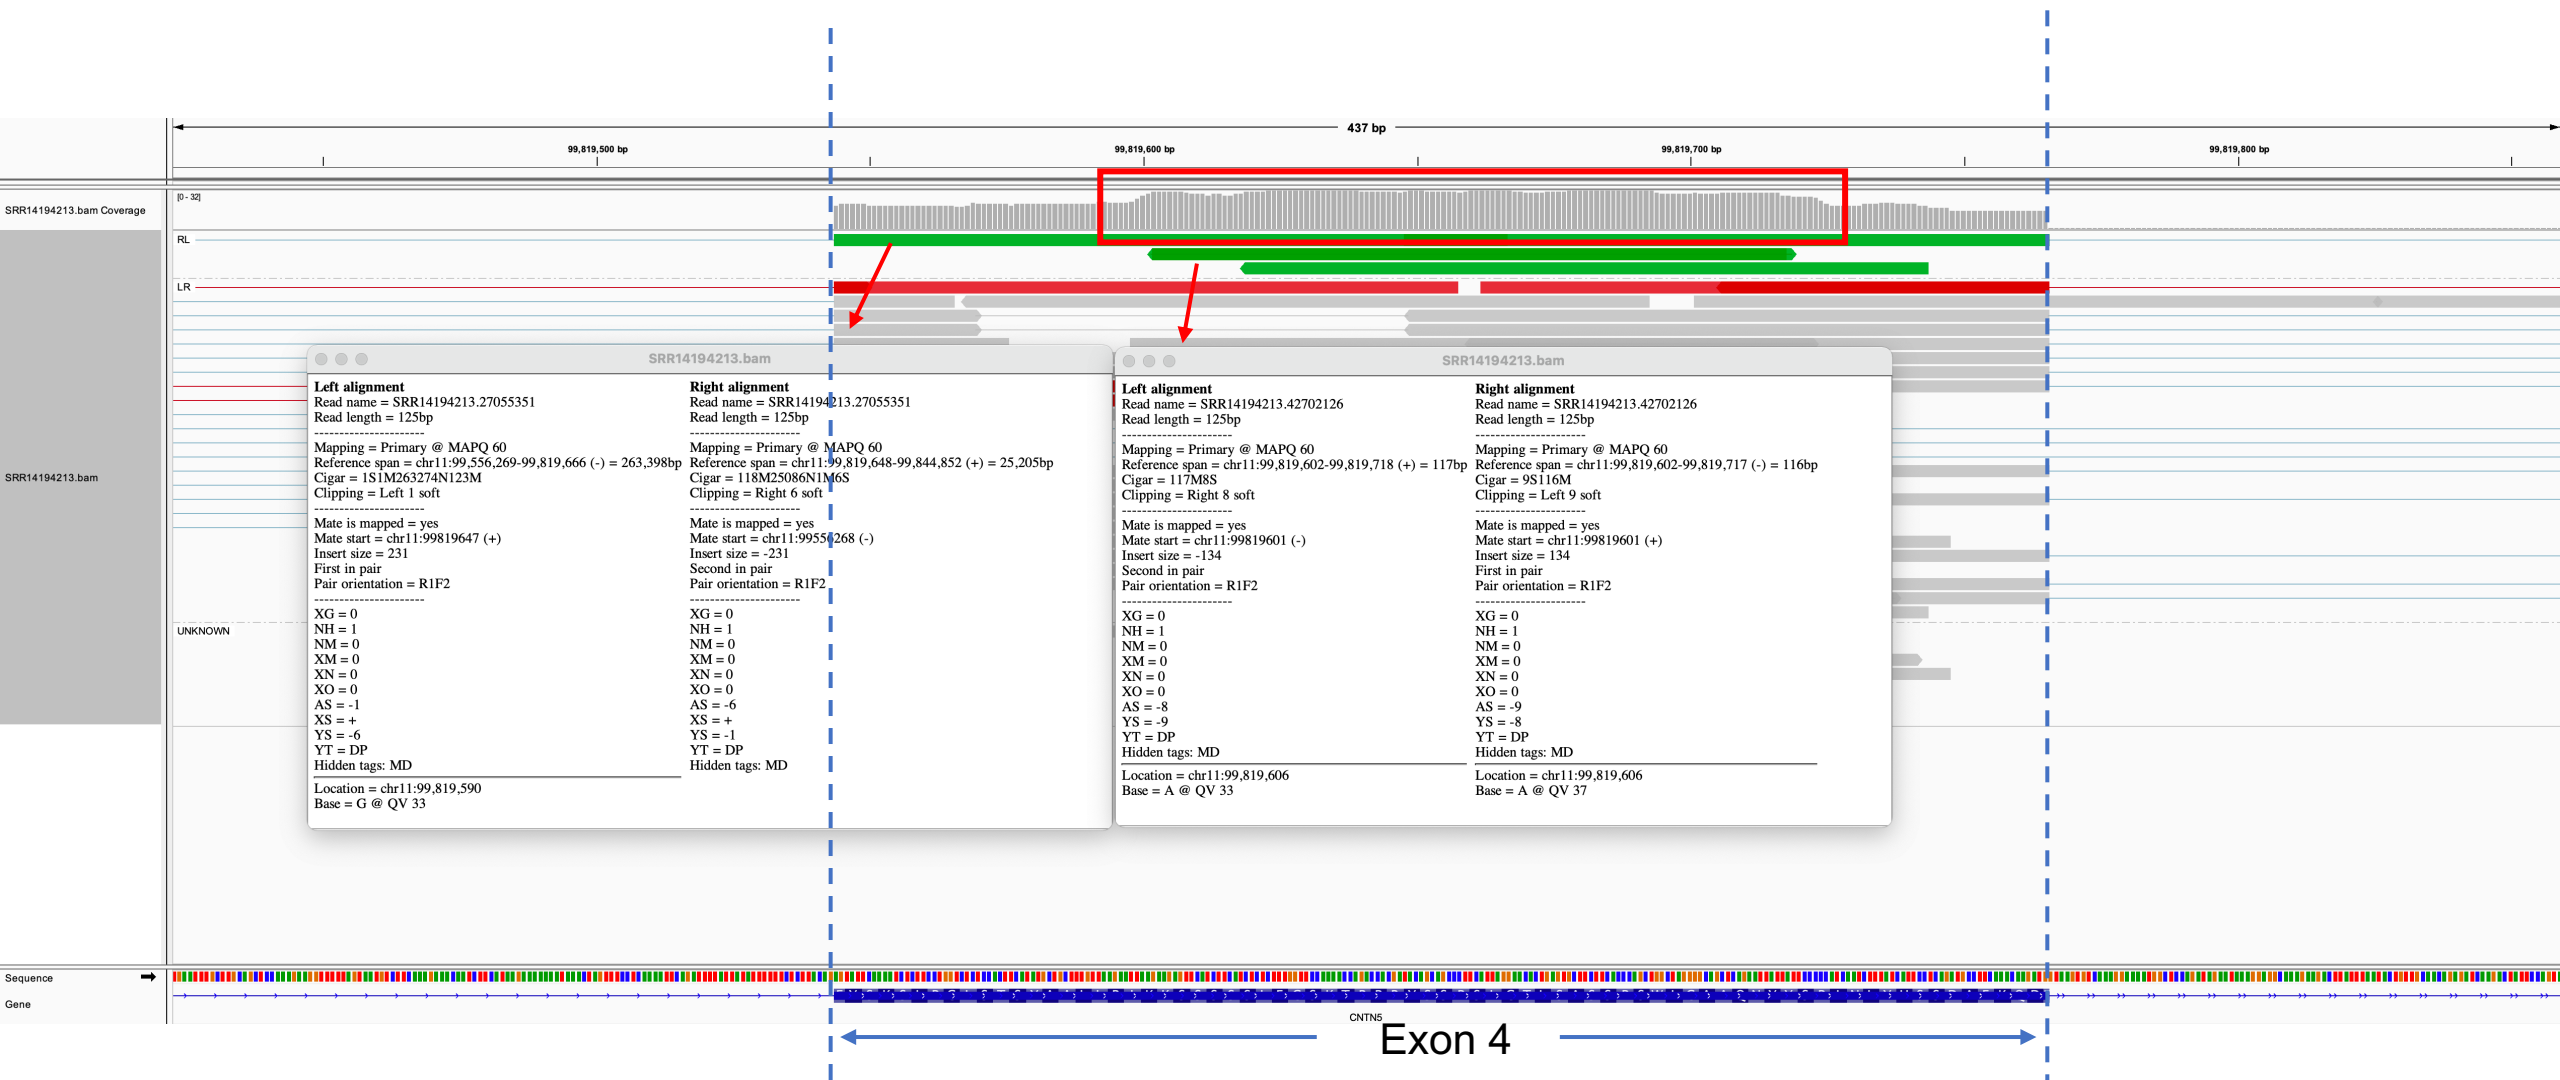

# ❖ SRR14194223, Control\_Male\_Primary\_Visual\_Cortex

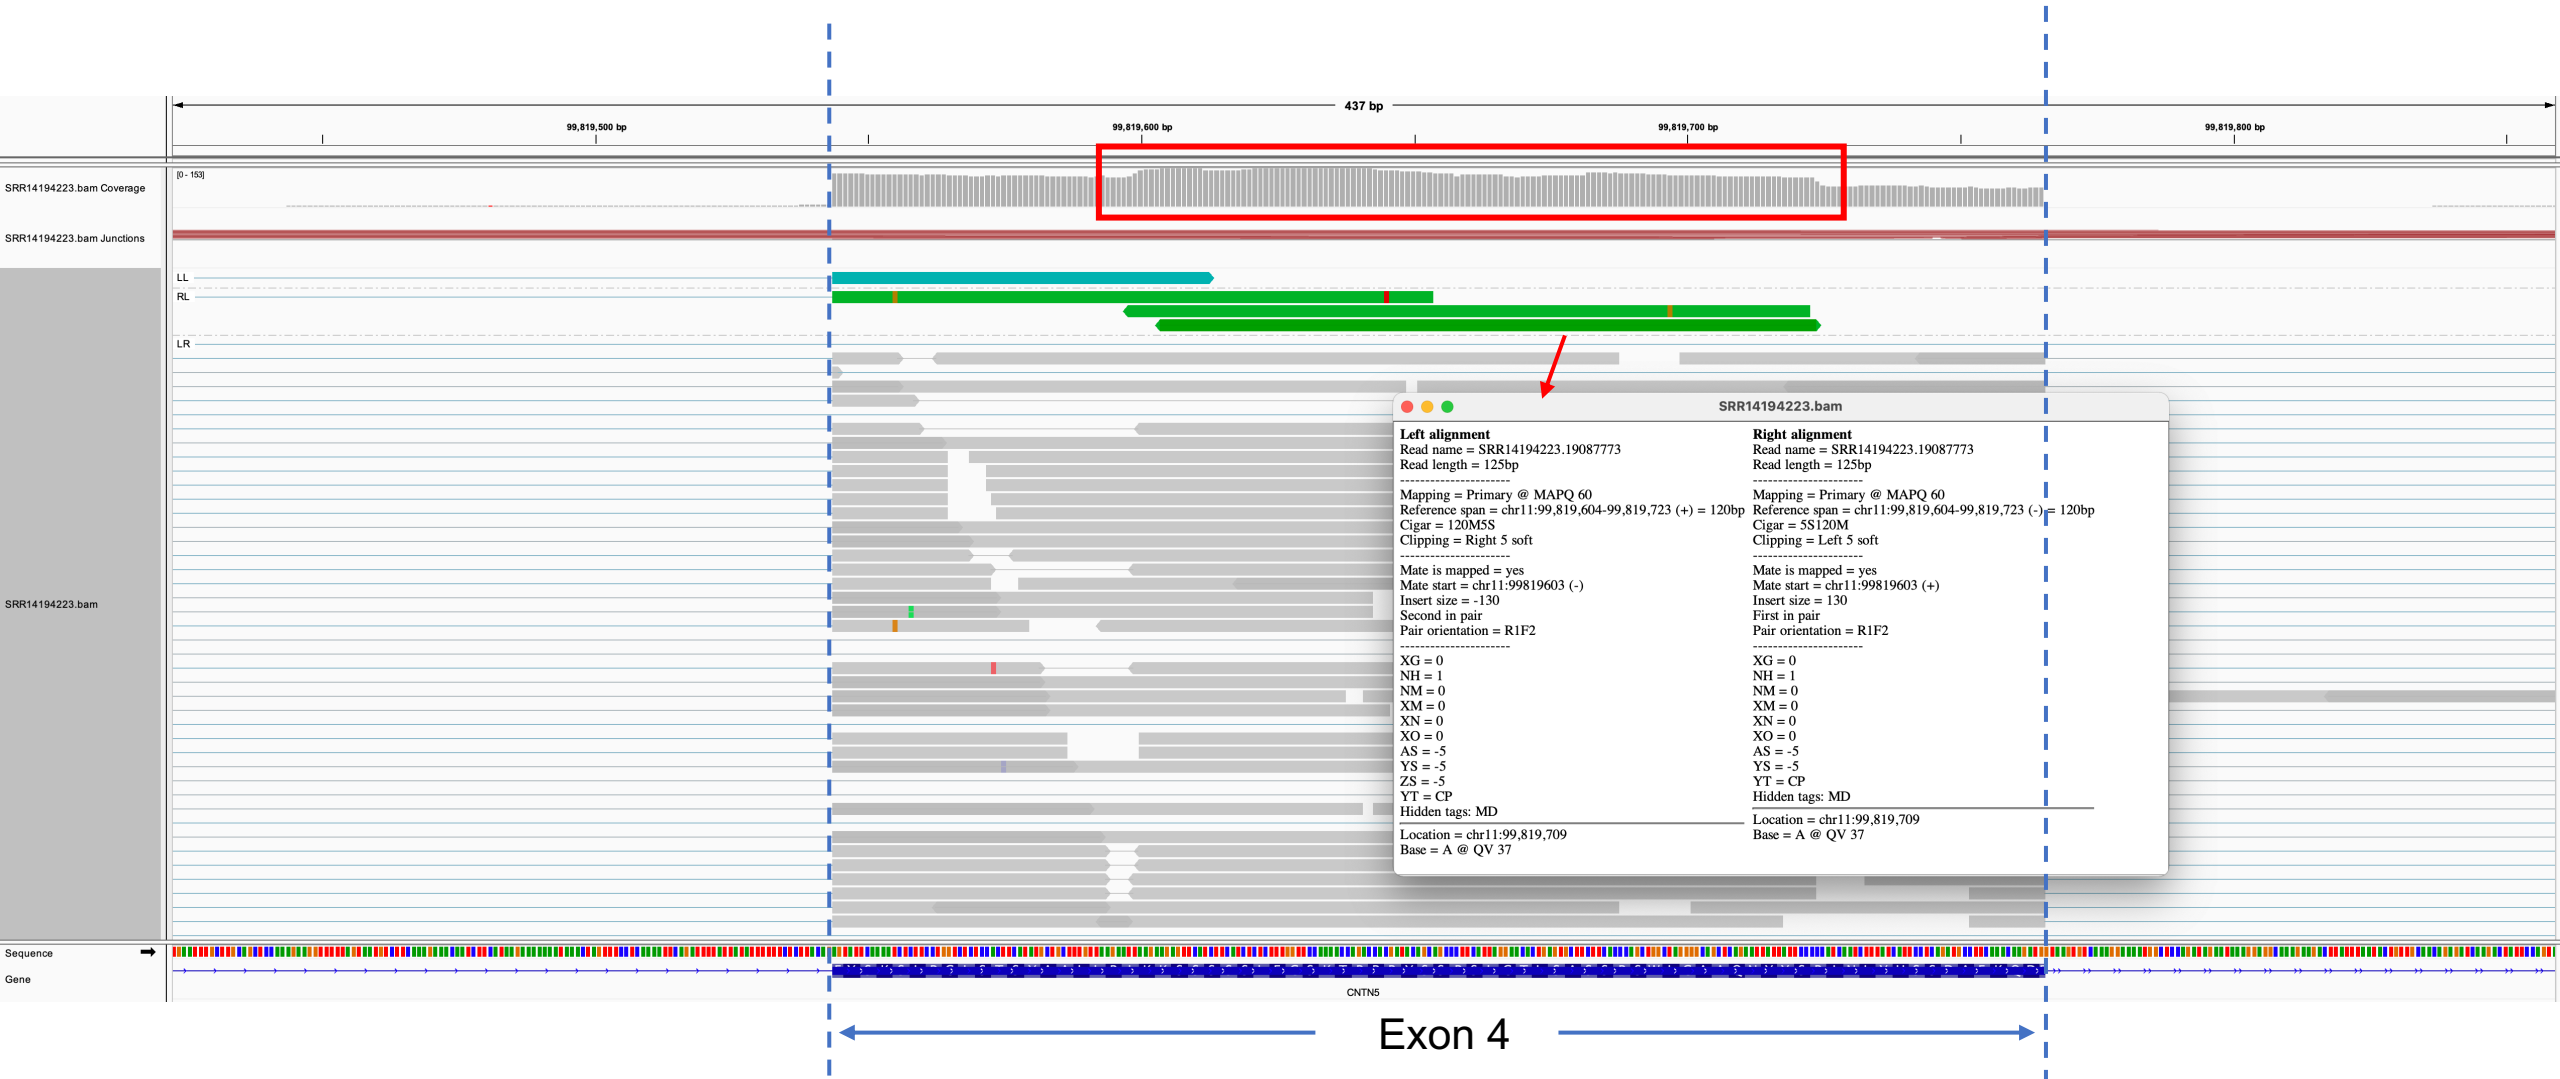

SRR14194223.bam

| Left alignment                                           | Right alignment                                          |
|----------------------------------------------------------|----------------------------------------------------------|
| Read name = SRR14194223.19087773                         | Read name = SRR14194223.19087773                         |
| Read length = 125bp                                      | Read length = 125bp                                      |
| Mapping = Primary @ MAPQ 60                              | Mapping = Primary @ MAPQ 60                              |
| Reference span = chr11:99,819,604-99,819,723 (+) = 120bp | Reference span = chr11:99,819,604-99,819,723 (-) = 120bp |
| Cigar = 120M5S                                           | Cigar = 5S120M                                           |
| Clipping = Right 5 soft                                  | Clipping = Left 5 soft                                   |
| Mate is mapped = yes                                     | Mate is mapped = yes                                     |
| Mate start = chr11:99819603 (-)                          | Mate start = chr11:99819603 (+)                          |
| Insert size = -130                                       | Insert size = 130                                        |
| Second in pair                                           | First in pair                                            |
| Pair orientation = R1F2                                  | Pair orientation = R1F2                                  |
| -----                                                    | -----                                                    |
| XG = 0                                                   | XG = 0                                                   |
| NH = 1                                                   | NH = 1                                                   |
| NM = 0                                                   | NM = 0                                                   |
| XM = 0                                                   | XM = 0                                                   |
| XN = 0                                                   | XN = 0                                                   |
| XO = 0                                                   | XO = 0                                                   |
| AS = -5                                                  | AS = -5                                                  |
| YS = -5                                                  | YS = -5                                                  |
| ZS = -5                                                  | YT = CP                                                  |
| YT = CP                                                  | Hidden tags: MD                                          |
| Hidden tags: MD                                          | Location = chr11:99,819,709                              |
| Location = chr11:99,819,709                              | Base = A @ QV 37                                         |
| Base = A @ QV 37                                         |                                                          |

# ❖ SRR14194215, Control\_Female\_Primary\_Visual\_Cortex

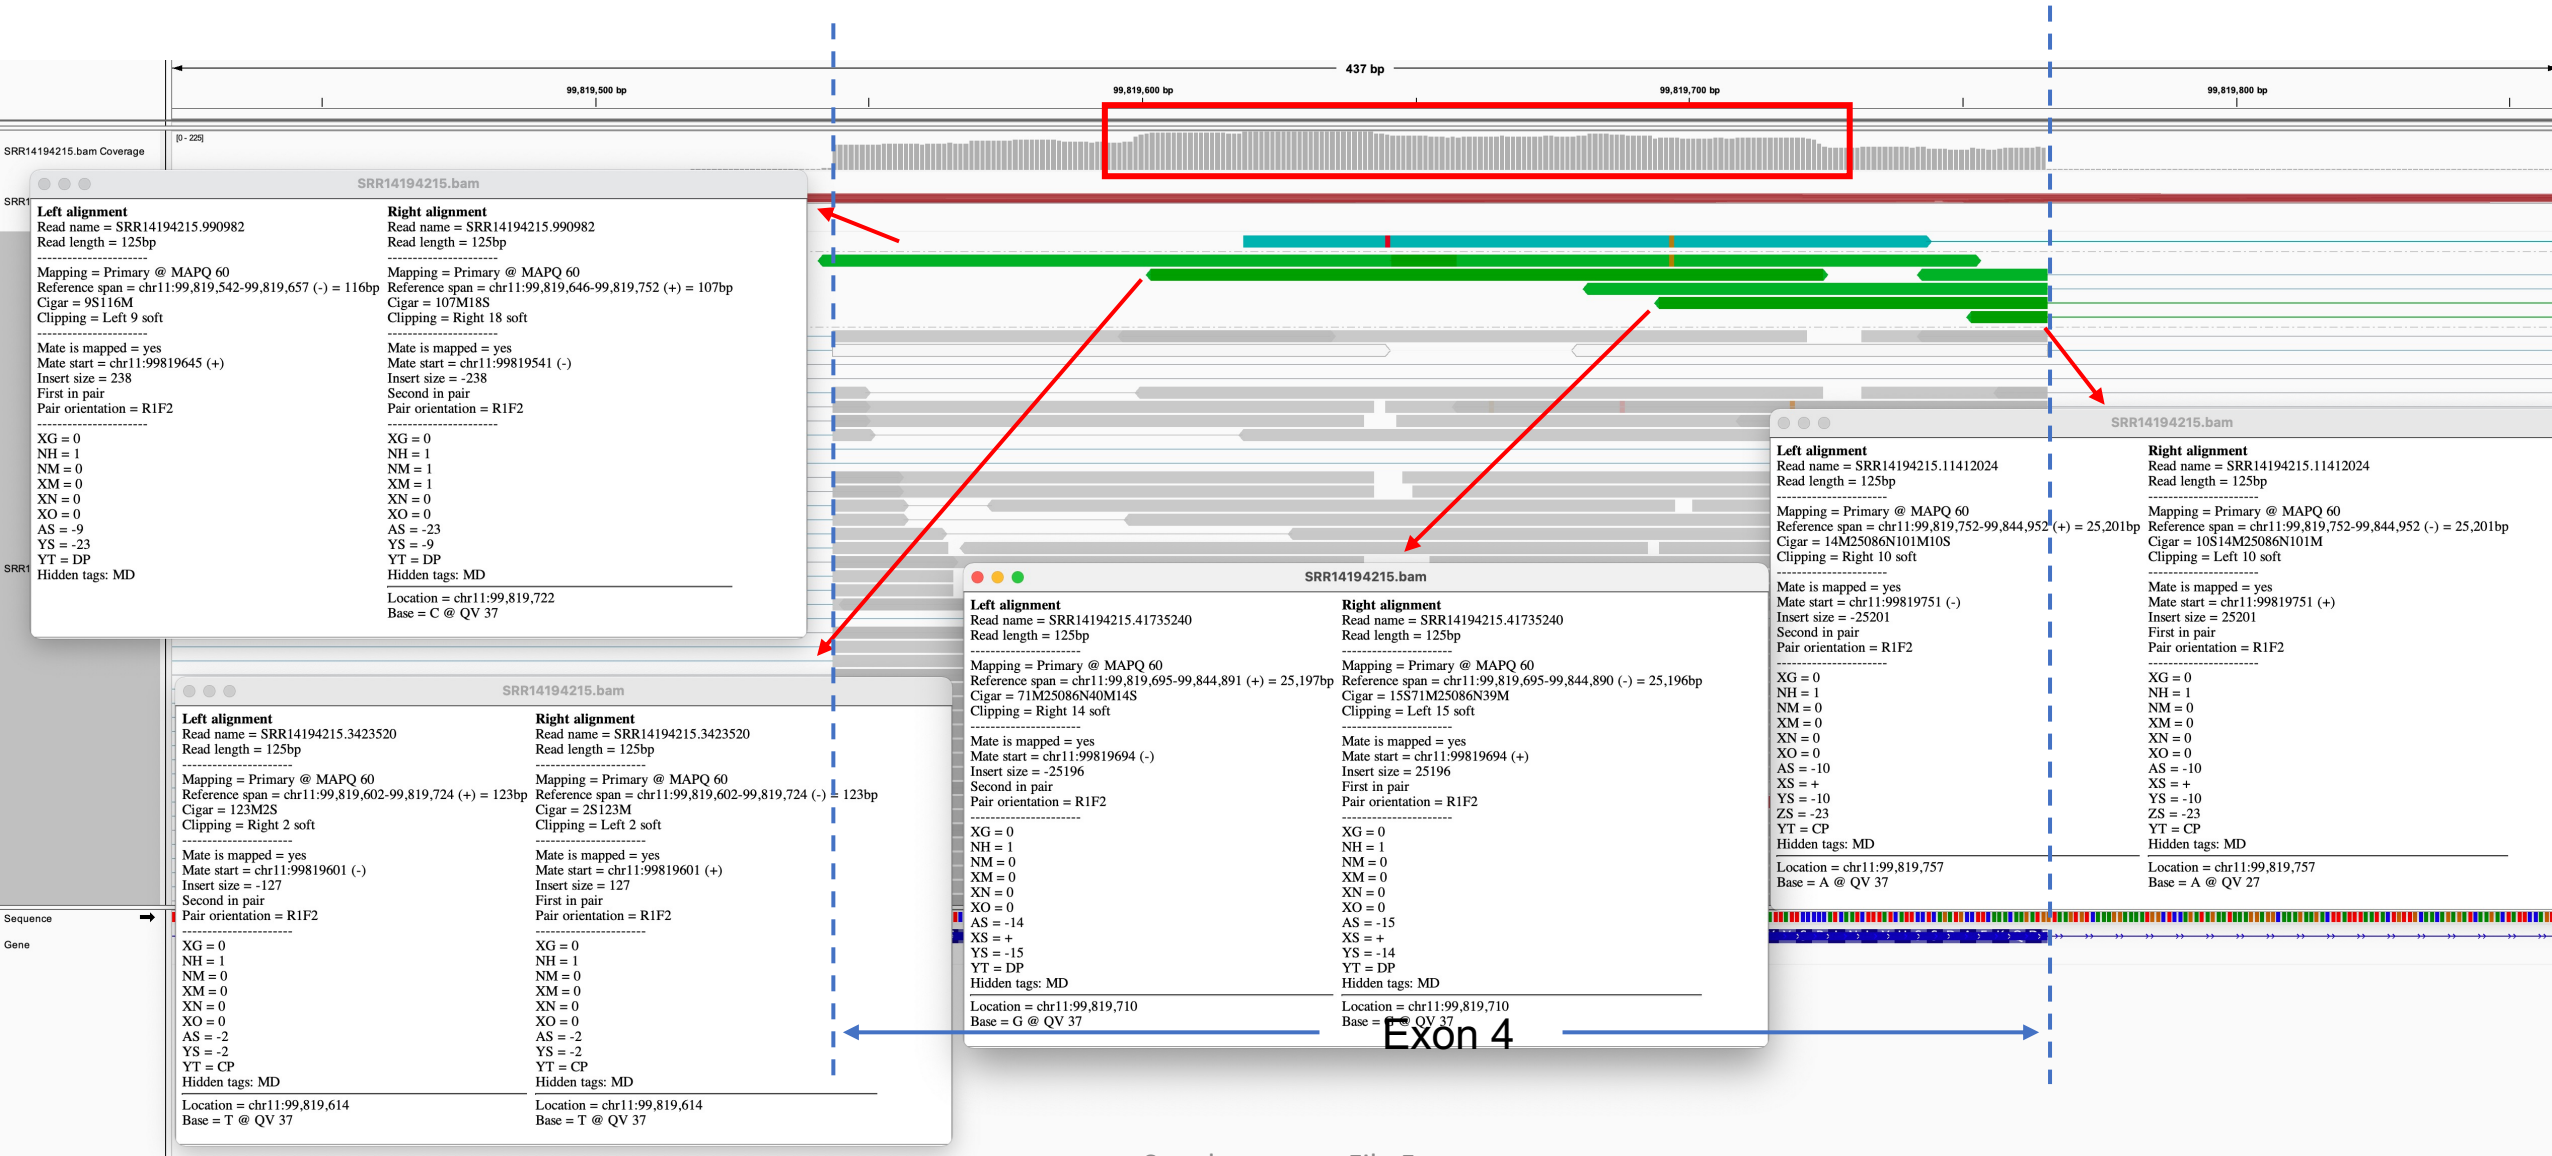

# ❖ SRR14194216, Control\_Female\_Primary\_Visual\_Cortex

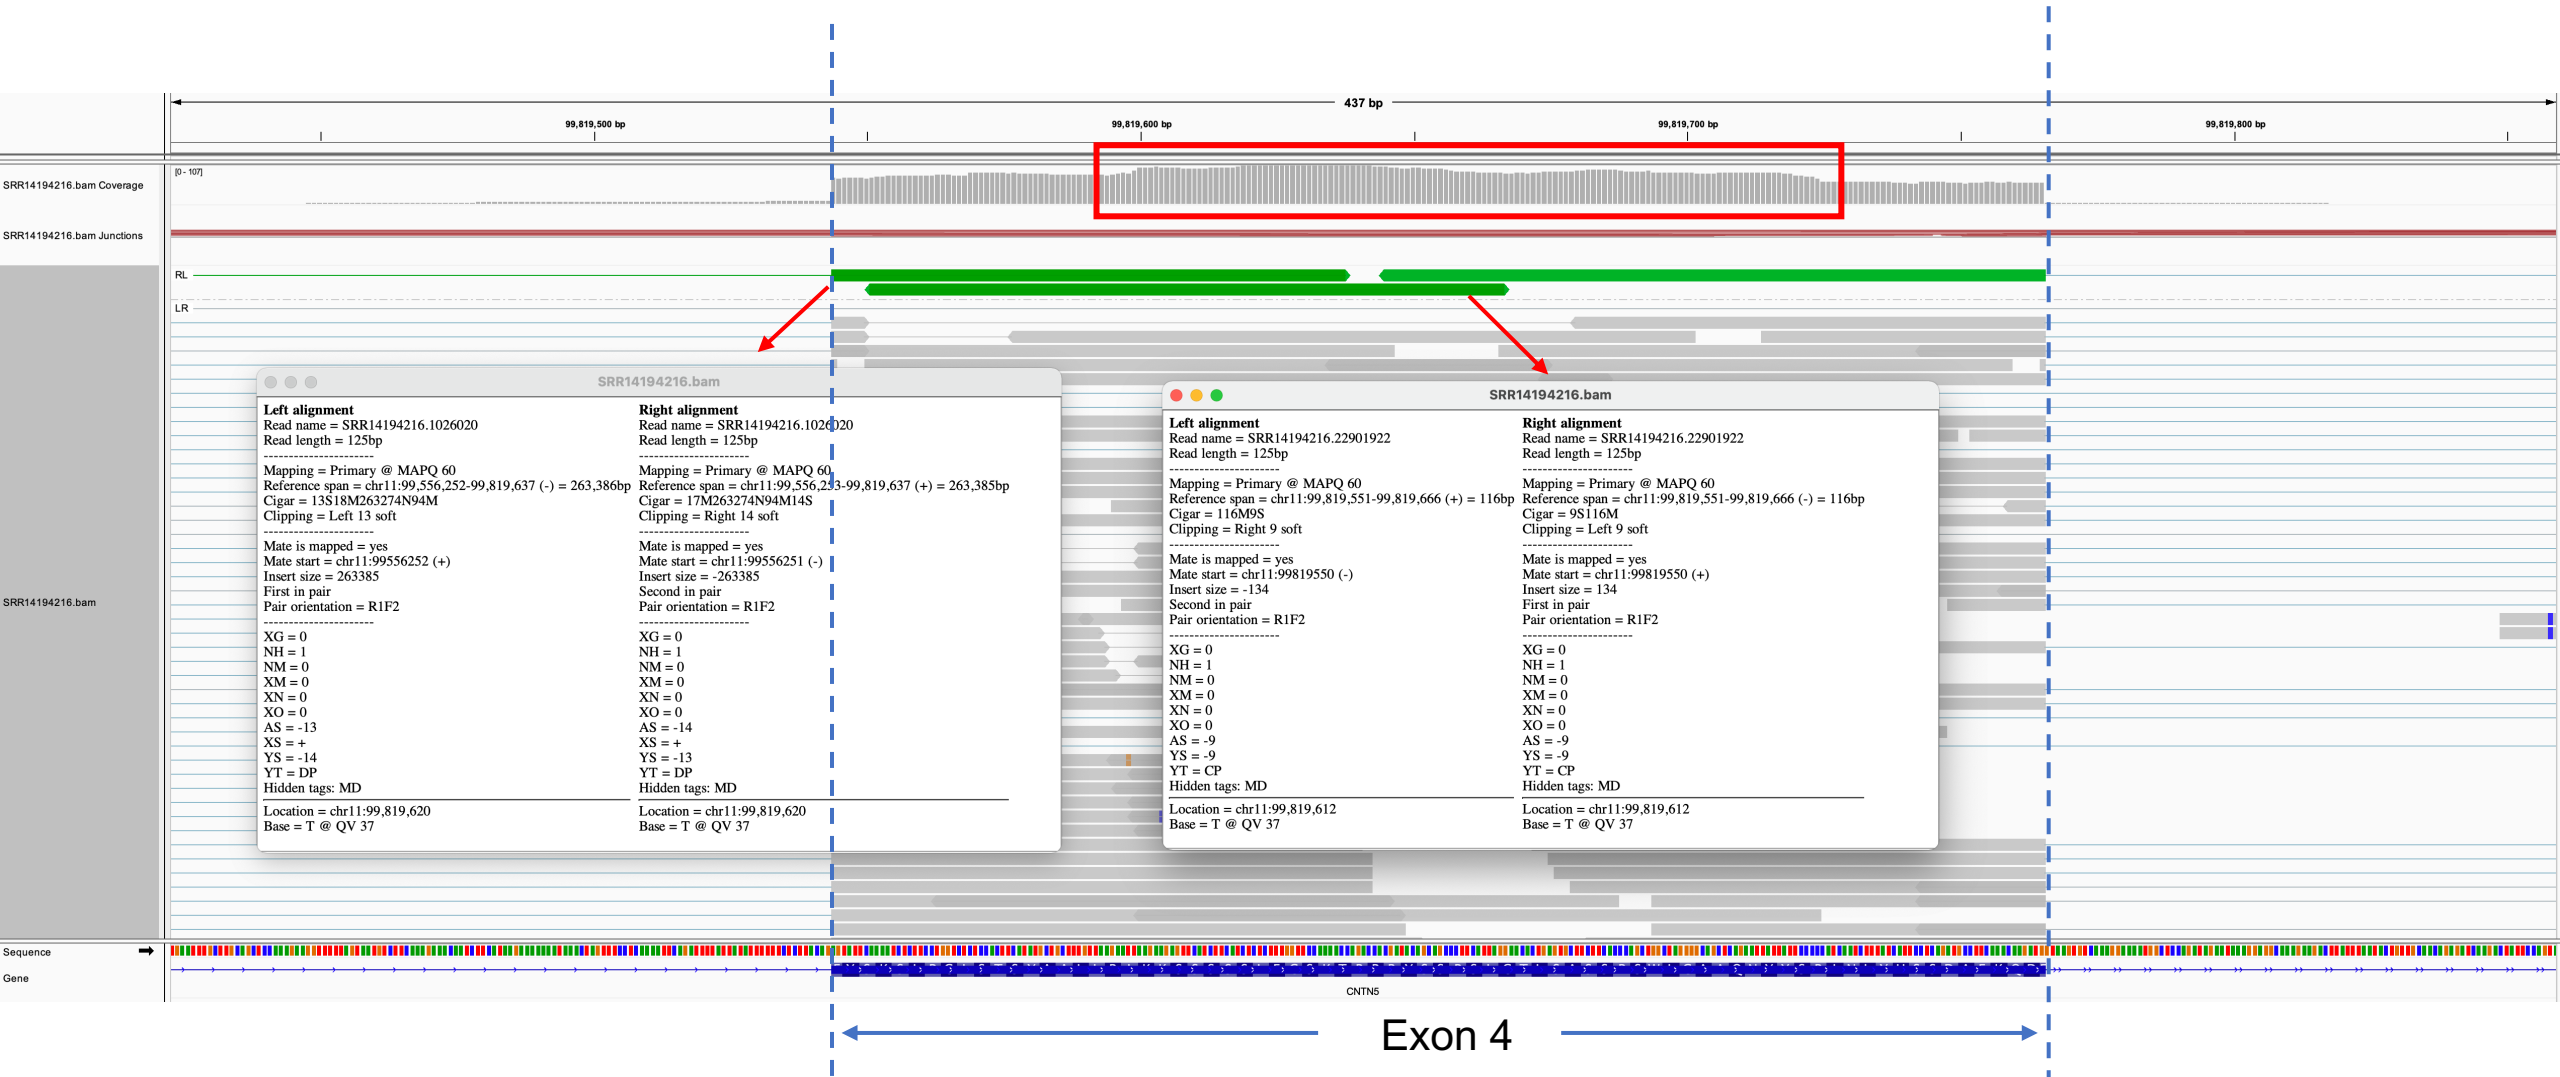

# ❖ SRR14194222, Alzheimer\_Disease\_Male\_Primary\_Visual\_Cortex

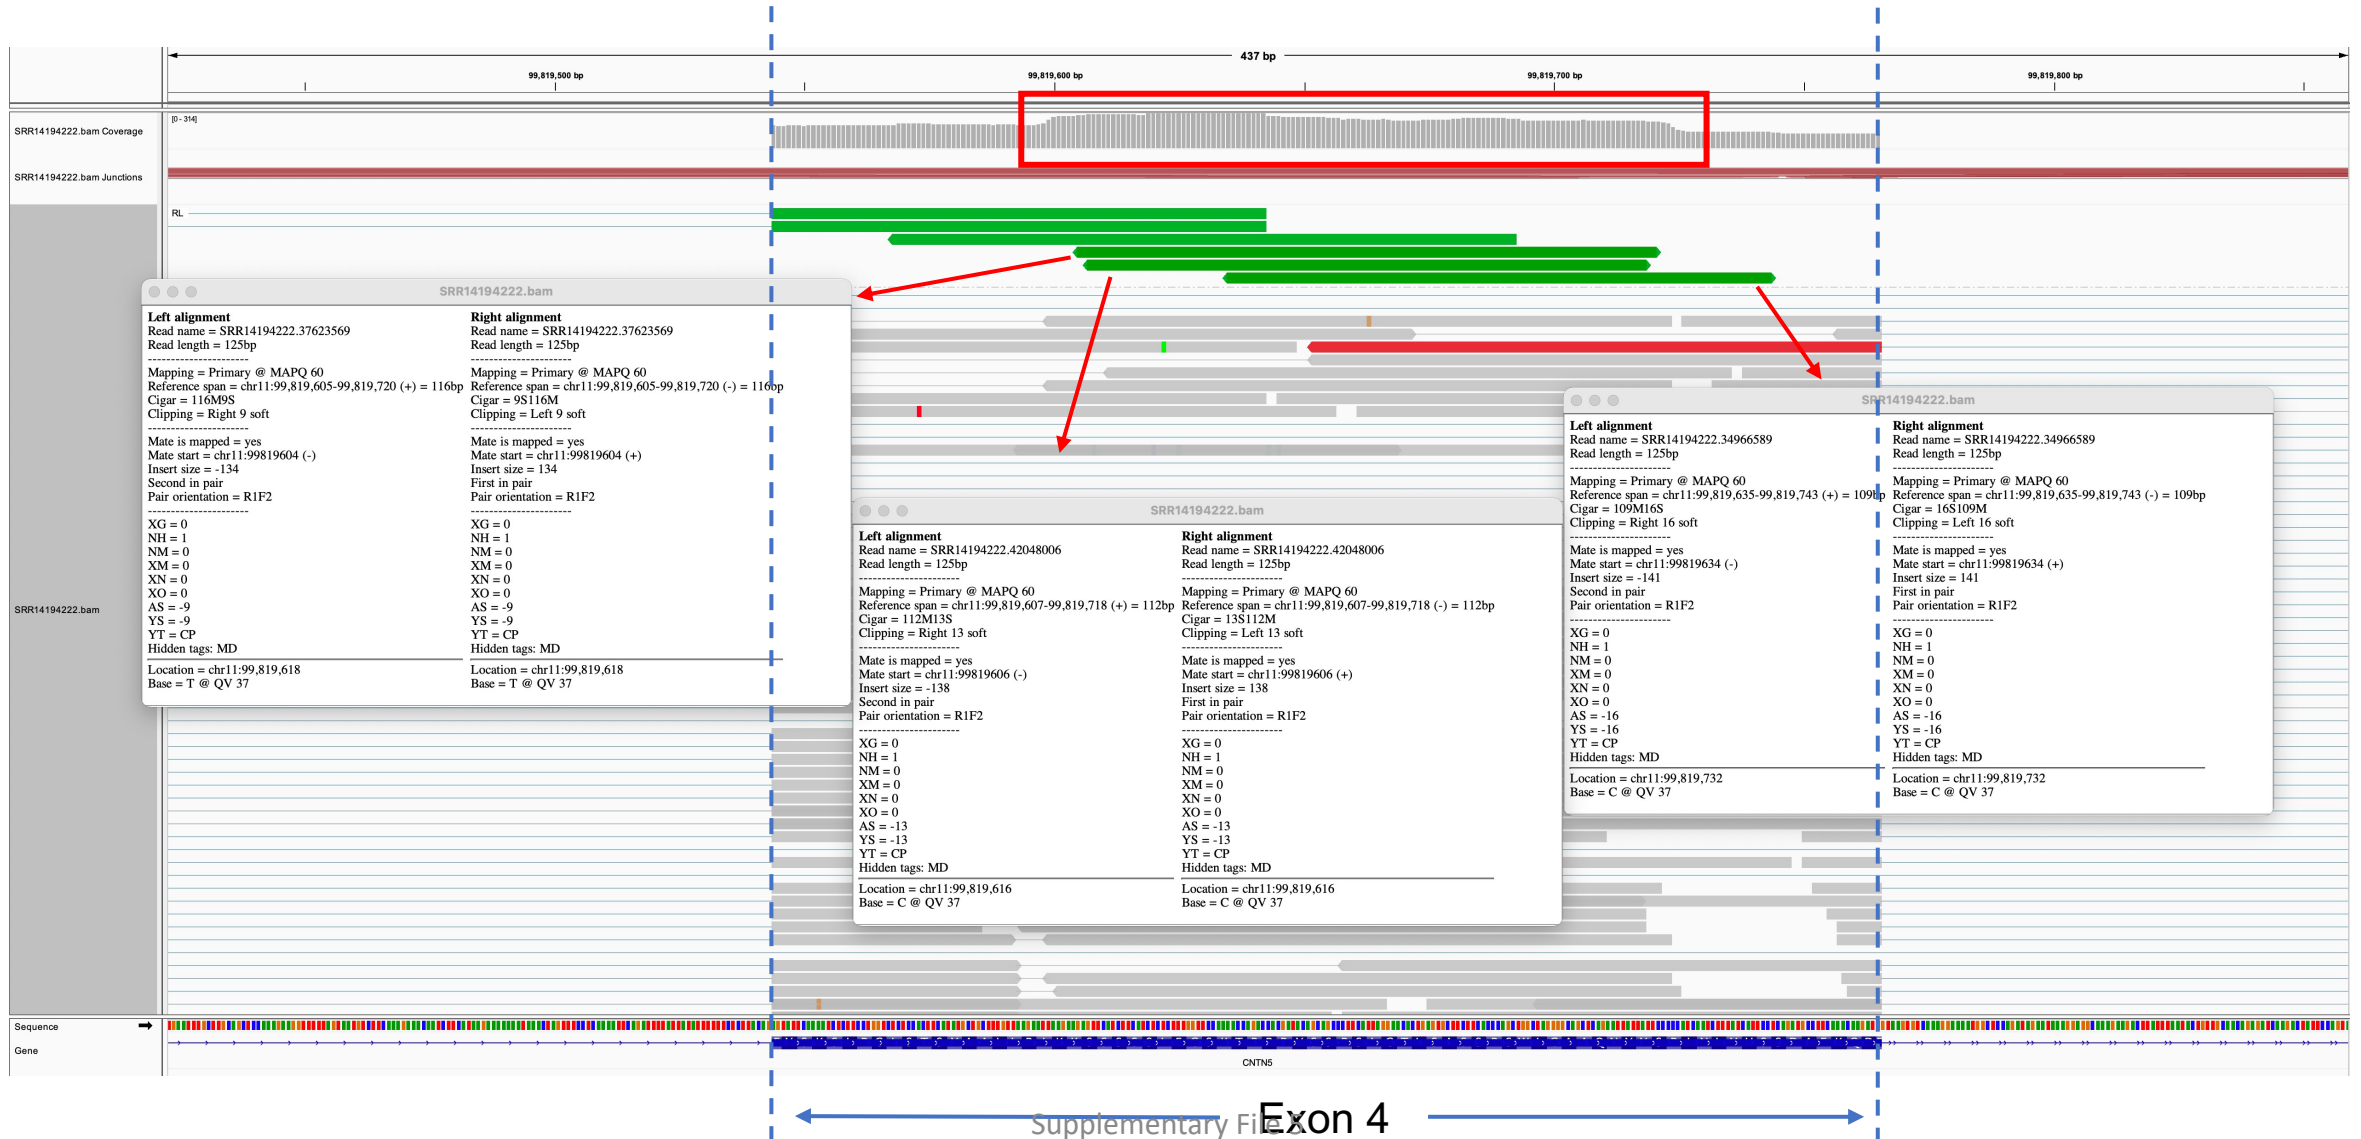



# ❖ SRR14194220, Alzheimer\_Disease\_Female\_Primary\_Visual\_Cortex

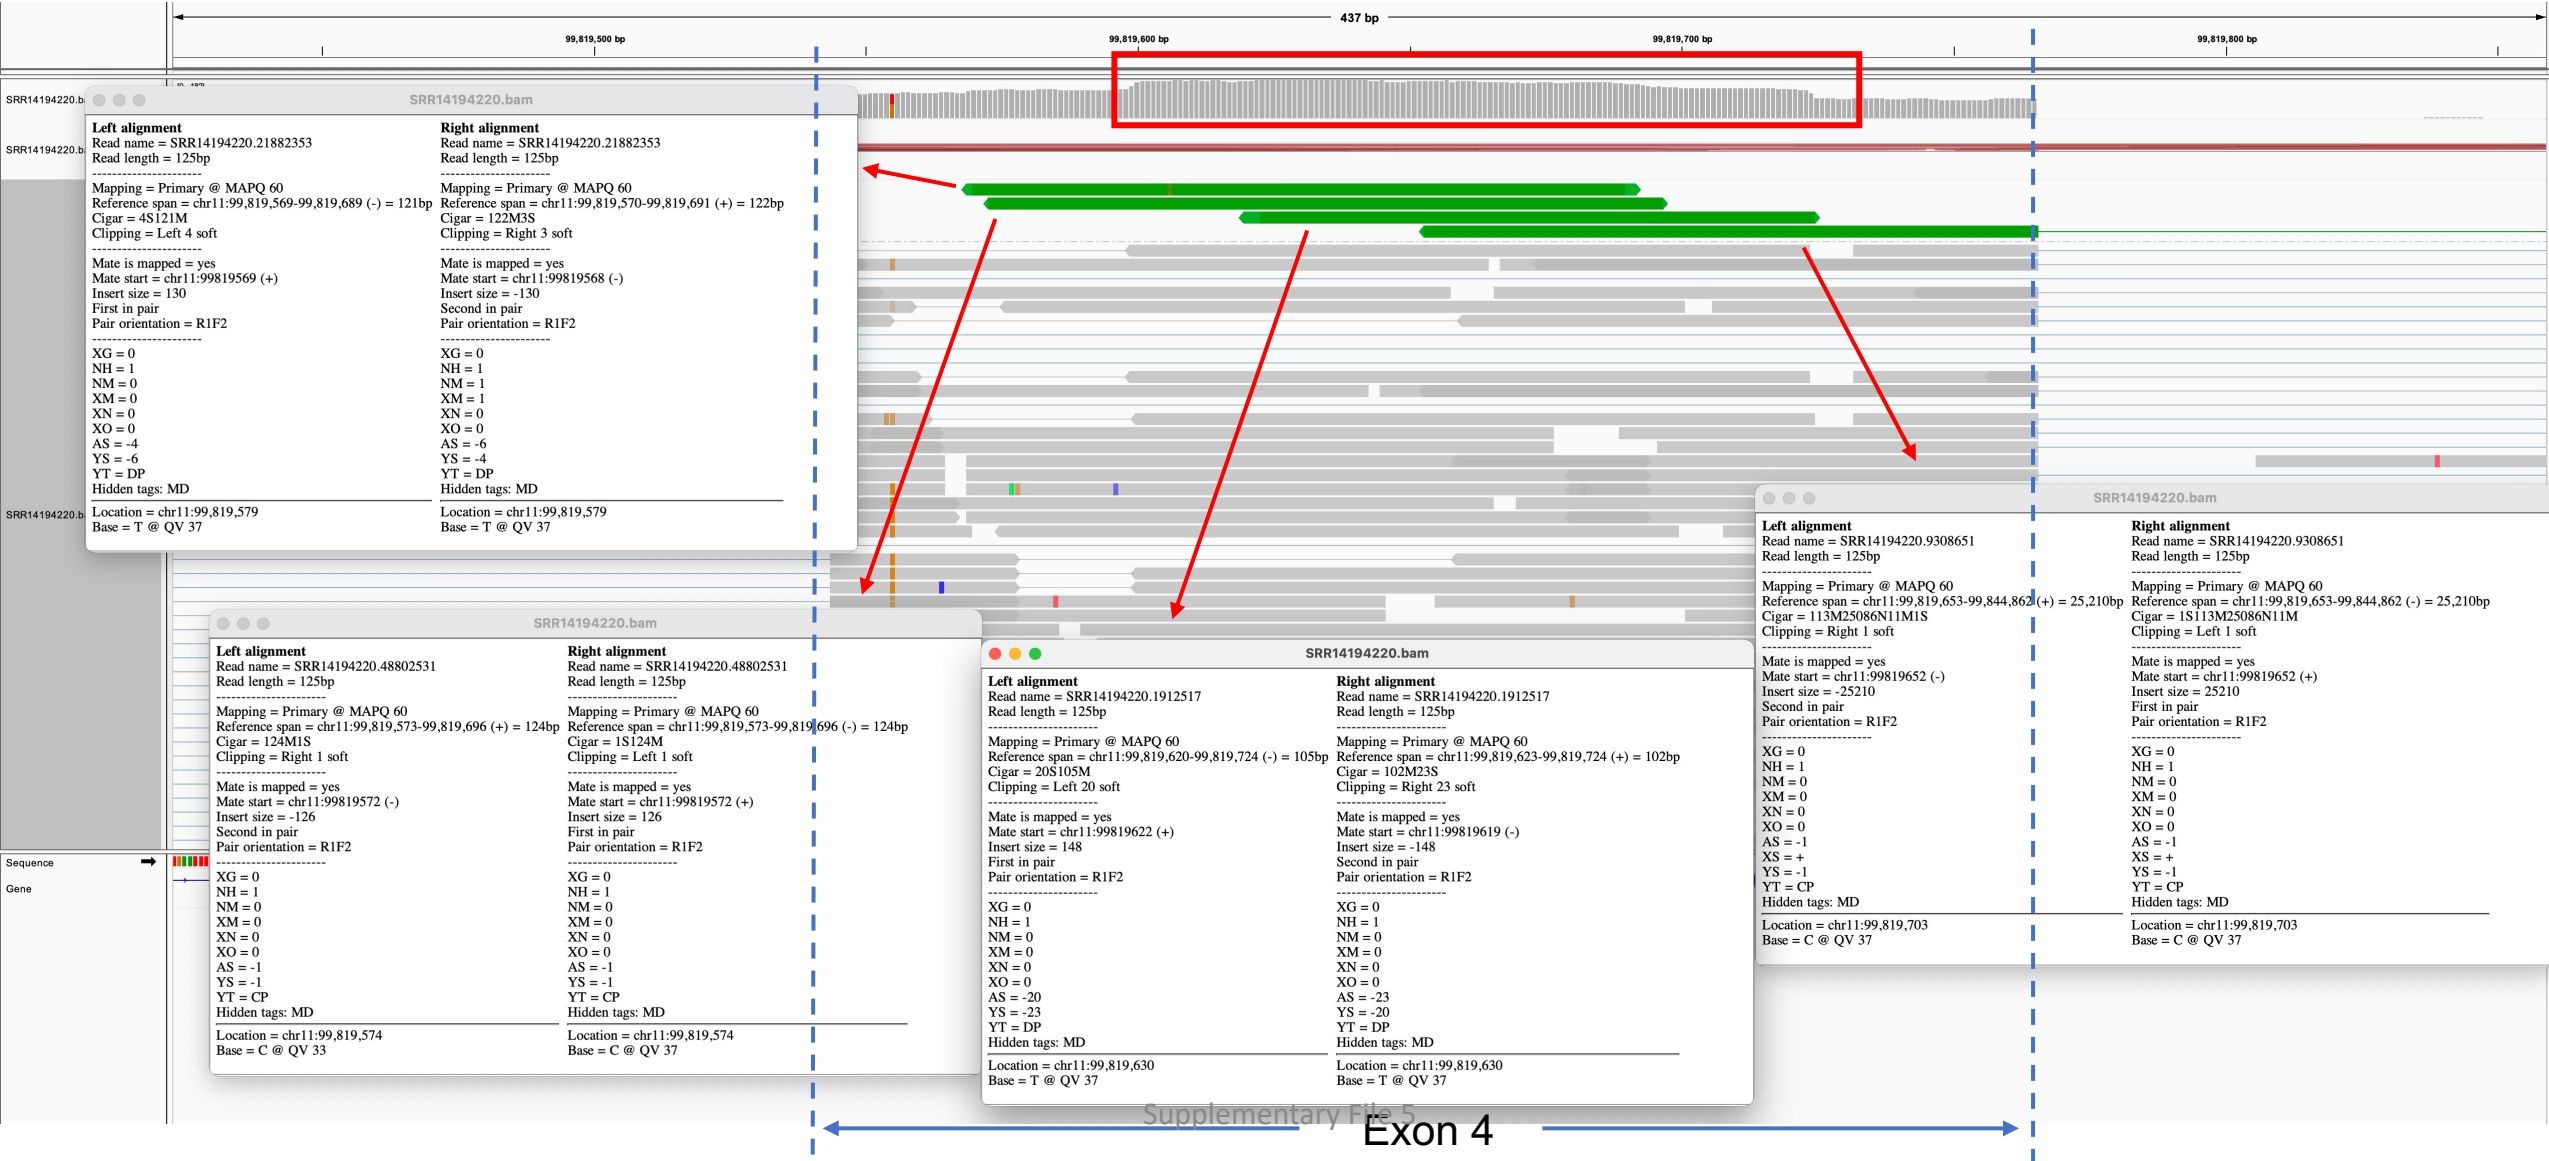

# ❖ SRR14194221, Alzheimer\_Disease\_Female\_Primary\_Visual\_Cortex

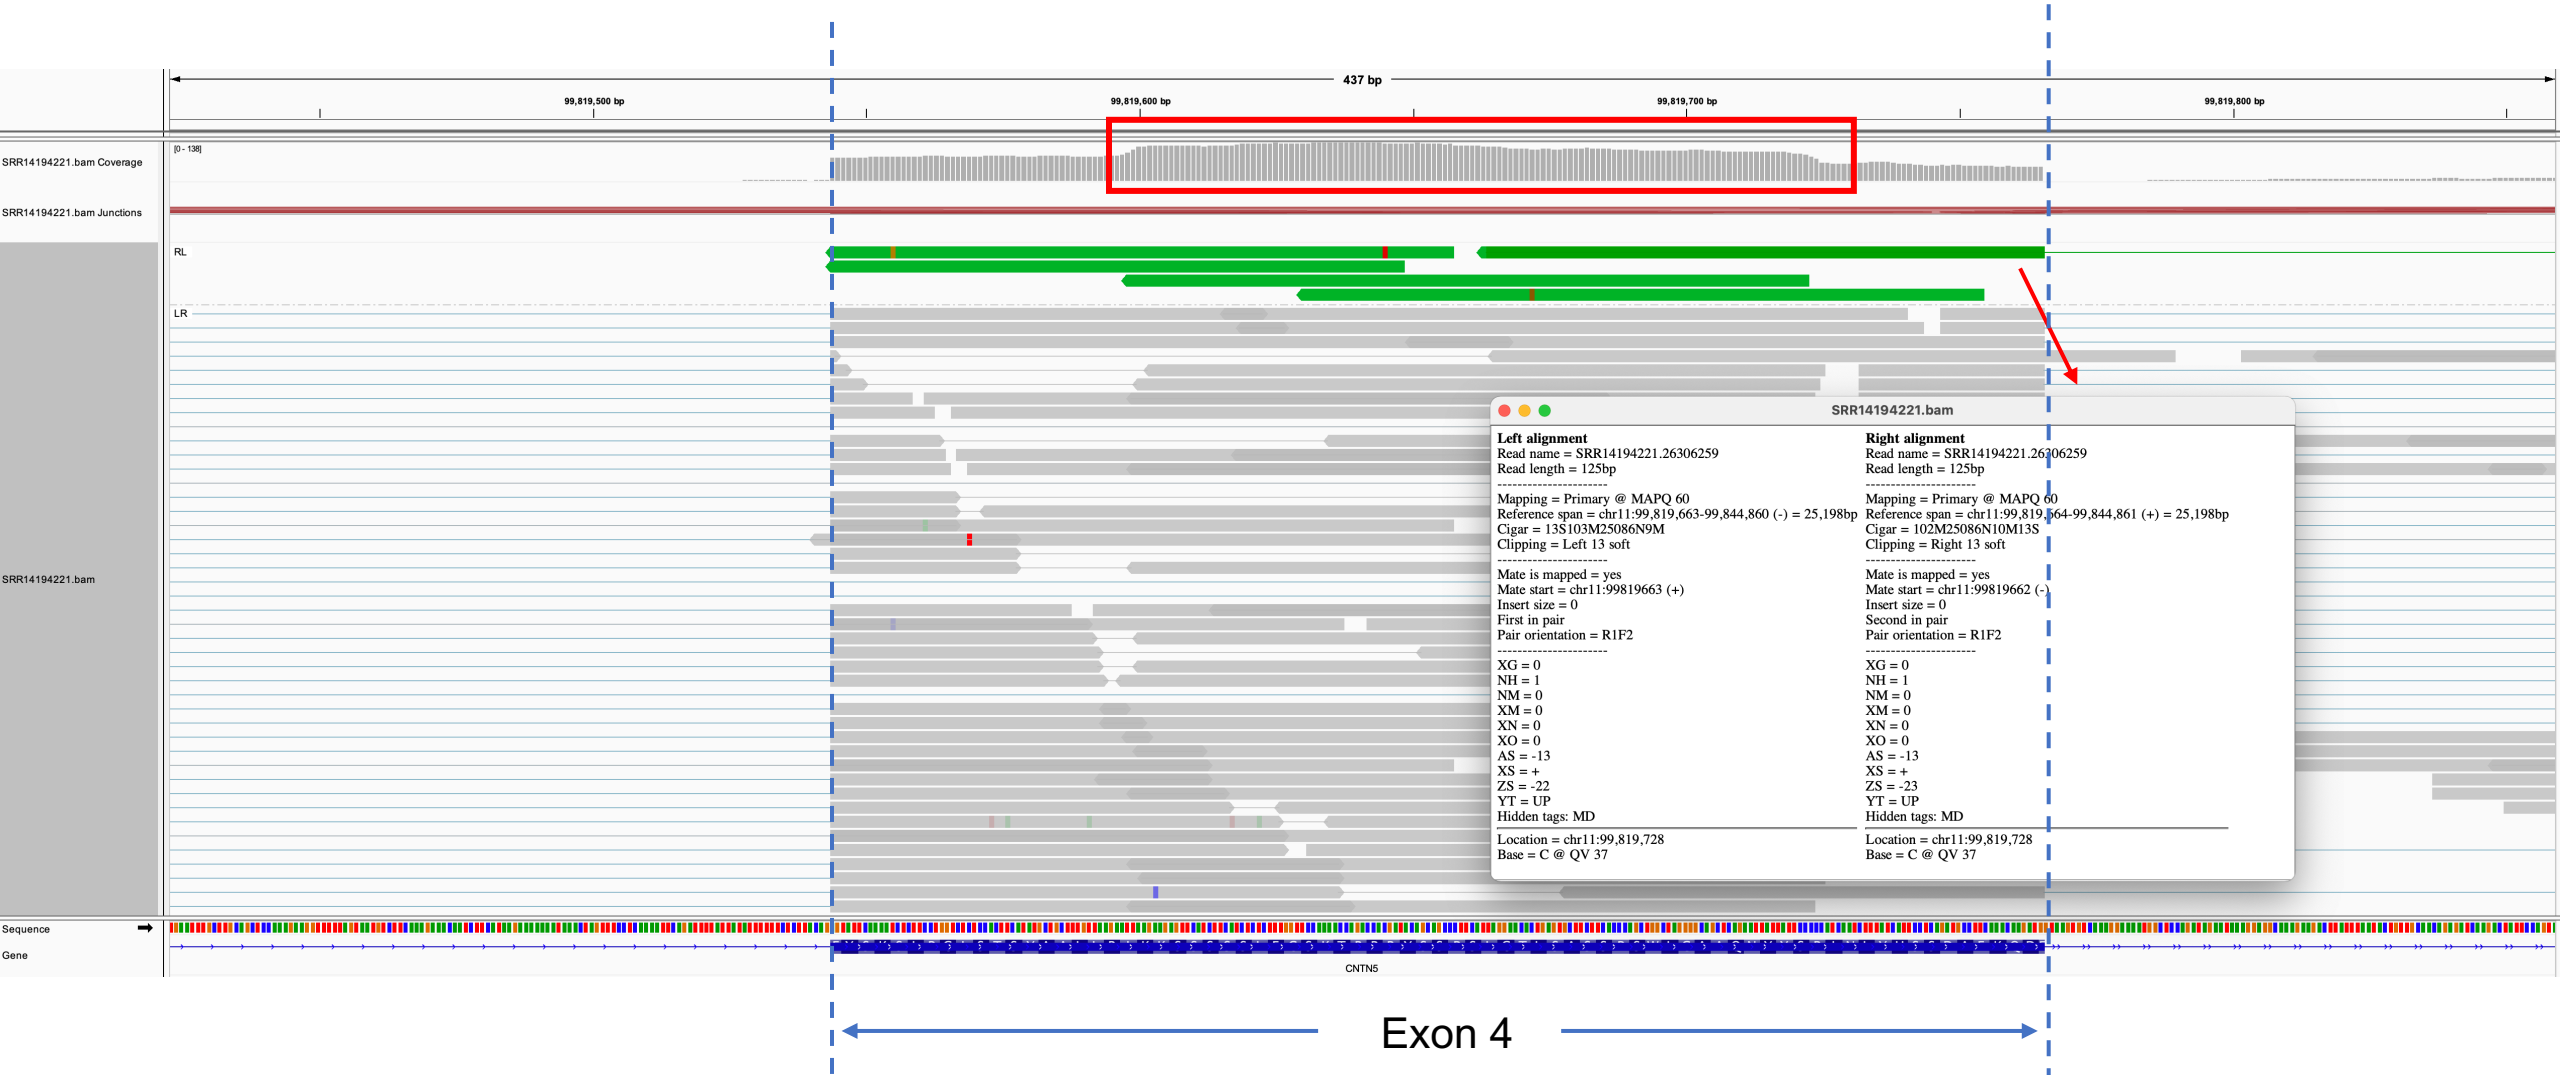

Supplement: NIHMS1867530-supplement-Supplementary_File_5.pdf [file NIHMS1867530-supplement-Supplementary_File_5.pdf]
